# Supplementary material for: Antagonism Pattern Detection between MicroRNA and Target Expression in Ewing’s Sarcoma
Source: PubMed Central journal article supplement (PMC3404966; doi:10.1371/journal.pone.0041770), 2012-07-25
Supplement: pone.0041770.s001.pdf [file pone.0041770.s001.pdf]

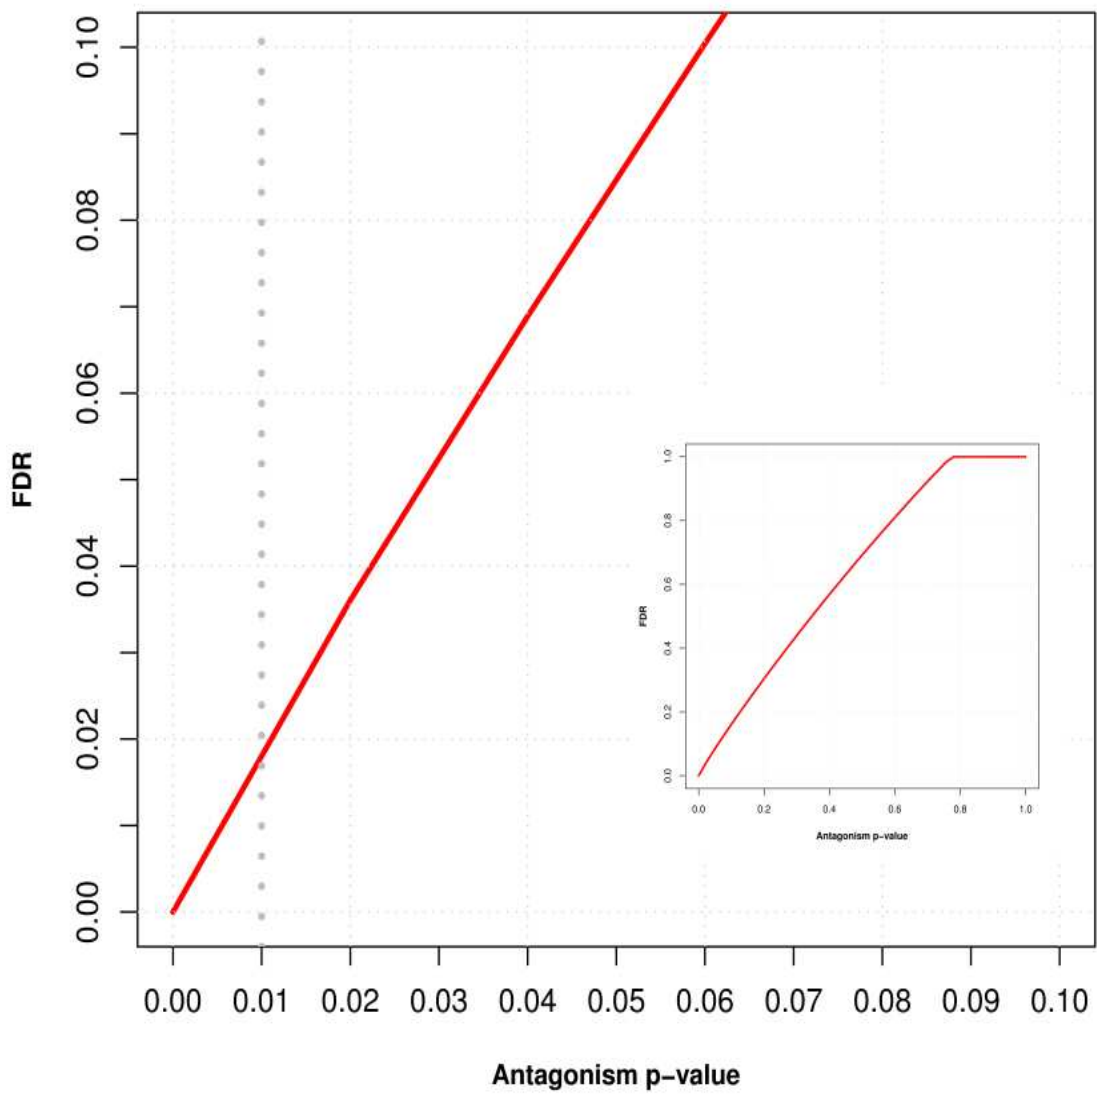

**Supplementary Figure 1.** Plot of the Antagonism p-value versus FDR used to pick the desired FDR level in Ewing's sarcoma study.
