# Supplementary material for: Antagonism Pattern Detection between MicroRNA and Target Expression in Ewing’s Sarcoma
Source: PubMed Central journal article supplement (PMC3404966; doi:10.1371/journal.pone.0041770), 2012-07-25
Supplement: pone.0041770.s002.pdf [file pone.0041770.s002.pdf]

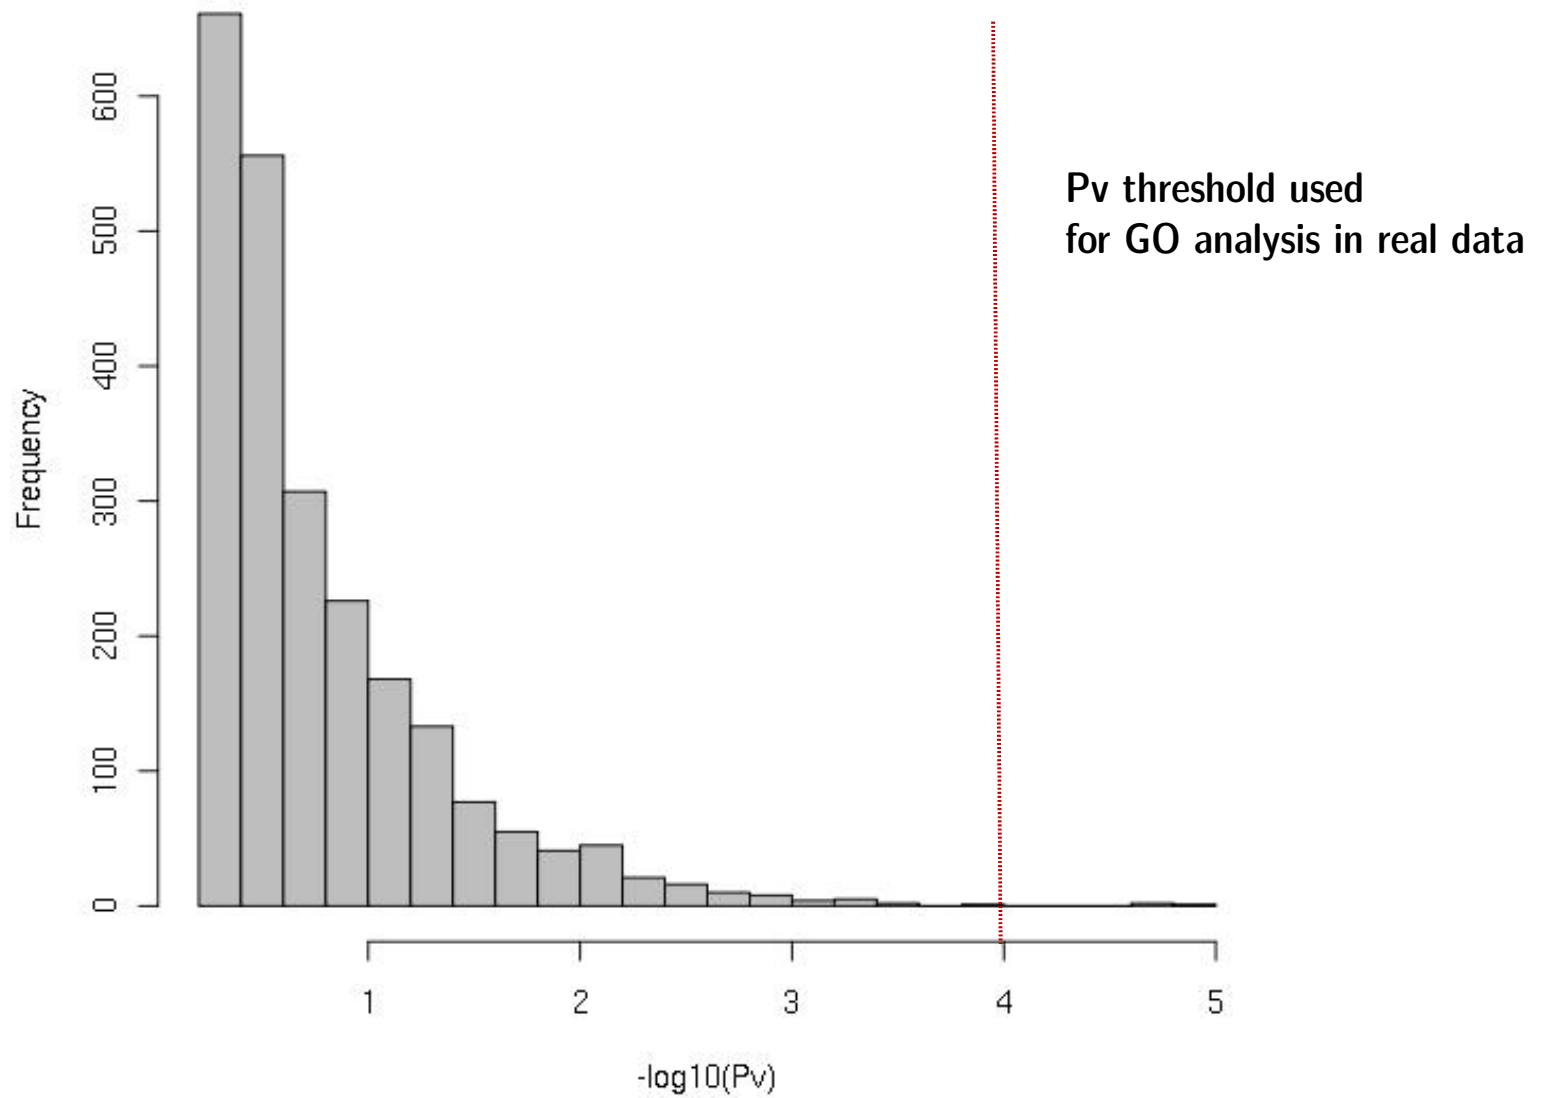

Supplementary Figure 2. GO enrichment p-value distribution in randomized target sets
