# Supplementary material for: Antagonism Pattern Detection between MicroRNA and Target Expression in Ewing’s Sarcoma
Source: PubMed Central journal article supplement (PMC3404966; doi:10.1371/journal.pone.0041770), 2012-07-25
Supplement: pone.0041770.s003.pdf [file pone.0041770.s003.pdf]

| <b>Data Source</b> | <b>Ref (PMID)</b>        | <b>Description</b>                     |
|--------------------|--------------------------|----------------------------------------|
| GSE19536           | <a href="#">21364938</a> | miRNA-mRNA in primary breast tumors    |
| GSE22058           | <a href="#">20739924</a> | miRNA-mRNA in Hepatocellular Carcinoma |
| GSE11508           | <a href="#">18724358</a> | miRNA-mRNA in Human Stem cells         |
| GSE7055            | <a href="#">18459106</a> | miRNA-mRNA in Prostate cancer          |

Table S1. Public datasets used for the test on experimentally validated miRNA targets.
