# Supplementary material for: Antagonism Pattern Detection between MicroRNA and Target Expression in Ewing’s Sarcoma
Source: PubMed Central journal article supplement (PMC3404966; doi:10.1371/journal.pone.0041770), 2012-07-25
Supplement: pone.0041770.s004.pdf [file pone.0041770.s004.pdf]

Table S2.Results obtained for the test on experimentally validated targets

| miRNA target        | Pearson r   | Correlation Pv | Antagonism Pv |
|---------------------|-------------|----------------|---------------|
| hsa-let-7a ACP1     | -0.6231581  | 1.73453e-06    | 0.015         |
| hsa-let-7a BCL2     | 0.2486819   | 0.04576699     | 0.153         |
| hsa-let-7a CDC25A   | 0.1499639   | 0.2331259      | 0.139         |
| hsa-let-7a DAD1     | 0.4048024   | 0.003913119    | 0.149         |
| hsa-let-7a DICER1   | -0.5424829  | 5.659068e-05   | 0.031         |
| hsa-let-7a HMGA1    | -0.7058605  | 1.472359e-08   | 0.002         |
| hsa-let-7a HMGA2    | -0.6106758  | 3.169111e-06   | 0.011         |
| hsa-let-7a KRAS     | -0.6515853  | 3.965013e-07   | 0.057         |
| hsa-let-7a MED28    | -0.3396184  | 0.005644565    | 0.088         |
| hsa-let-7a MYC      | -0.1108327  | 0.3794358      | 0.132         |
| hsa-let-7a NKIRAS2  | 0.5095615   | 0.000184358    | 0.554         |
| hsa-let-7a NRAS     | 0.2388212   | 0.09841185     | 0.368         |
| hsa-let-7a RTCD1    | 0.05335366  | 0.715788       | 0.303         |
| hsa-let-7a SMOX     | 0.2716814   | 0.02858071     | 0.091         |
| hsa-let-7a TRIM71   | -0.8048728  | 3.17775e-12    | 0.002         |
| hsa-let-7a VDR      | 0.2817042   | 0.02300467     | 0.212         |
| hsa-let-7b AARSD1   | -0.4299215  | 0.002049008    | 0.123         |
| hsa-let-7b ACTG1    | 0.4905331   | 0.0003460044   | 0.219         |
| hsa-let-7b AKAP8    | -0.4762661  | 0.000541851    | 0.166         |
| hsa-let-7b ANAPC1   | -0.8425689  | 3.187934e-14   | 0.013         |
| hsa-let-7b ATP6V0A1 | 0.02082315  | 0.8692258      | 0.251         |
| hsa-let-7b ATP6V1F  | 0.4845633   | 0.0004184316   | 0.277         |
| hsa-let-7b AURKB    | -0.7369839  | 1.562205e-09   | 0.001         |
| hsa-let-7b BAT2     | 0.1157728   | 0.2489509      | 0.175         |
| hsa-let-7b BCL7A    | 0.02568973  | 0.8390319      | 0.016         |
| hsa-let-7b CALCOCO2 | 0.1464228   | 0.2444731      | 0.403         |
| hsa-let-7b CAPG     | -0.21248    | 0.1255239      | 0.048         |
| hsa-let-7b CARHSP1  | -0.5281623  | 9.602204e-05   | 0.016         |
| hsa-let-7b CCND1    | 0.4569926   | 0.0001298562   | 0.024         |
| hsa-let-7b CDC25A   | 0.1728297   | 0.1685908      | 0.305         |
| hsa-let-7b CDC34    | -0.1696679  | 0.2438211      | 0.048         |
| hsa-let-7b CDIPT    | 0.3402458   | 0.01675284     | 0.139         |
| hsa-let-7b CHMP2A   | 0.6359415   | 9.09921e-07    | 0.745         |
| hsa-let-7b COIL     | -0.4415157  | 0.001494564    | 0.092         |
| hsa-let-7b COMMD9   | 0.6082117   | 3.558705e-06   | 0.79          |
| hsa-let-7b CSNK1D   | 0.2535318   | 0.07878956     | 0.283         |
| hsa-let-7b DSP      | 0.06182393  | 0.5390984      | 0.09          |
| hsa-let-7b DUSP12   | -0.188746   | 0.1940043      | 0.159         |
| hsa-let-7b DUSP23   | -0.3286795  | 0.02111988     | 0.124         |
| hsa-let-7b FADS2    | 0.161388    | 0.2679337      | 0.01          |
| hsa-let-7b FAM105A  | -0.09866934 | 0.3262626      | 0.195         |
| hsa-let-7b FAM96A   | -0.5907846  | 7.864086e-06   | 0.002         |
| hsa-let-7b FNDC3A   | 0.2192553   | 0.1301143      | 0.278         |
| hsa-let-7b GAK      | -0.04136183 | 0.7778061      | 0.113         |
| hsa-let-7b GPR56    | 0.210882    | 0.08348758     | 0.084         |
| hsa-let-7b GRPEL2   | -0.5426301  | 5.627699e-05   | 0.001         |
| hsa-let-7b GTPBP3   | -0.674228   | 1.090983e-07   | 0.027         |
| hsa-let-7b GYS1     | 0.4436447   | 0.001408732    | 0.124         |
| hsa-let-7b HMGA1    | -0.6355105  | 9.30374e-07    | 0.007         |
| hsa-let-7b HMGA2    | -0.690907   | 3.915952e-08   | 0.008         |
| hsa-let-7b IFIT5    | -0.1951339  | 0.1193021      | 0.212         |
| hsa-let-7b IFRD1    | -0.1317821  | 0.3667351      | 0.018         |

Table S2.Results obtained for the test on experimentally validated targets

|                     |             |              |       |
|---------------------|-------------|--------------|-------|
| hsa-let-7b IPO4     | -0.4465575  | 0.001298427  | 0.038 |
| hsa-let-7b KRAS     | -0.5678222  | 2.088788e-05 | 0.032 |
| hsa-let-7b MLLT1    | 0.3920537   | 0.005335897  | 0.041 |
| hsa-let-7b MRPS24   | 0.06386812  | 0.6628505    | 0.268 |
| hsa-let-7b MRPS33   | 0.01062645  | 0.9422304    | 0.342 |
| hsa-let-7b MTPN     | 0.153691    | 0.2917255    | 0.152 |
| hsa-let-7b MTRR     | -0.5289712  | 9.325548e-05 | 0.045 |
| hsa-let-7b NEDD4    | 0.1038191   | 0.4777693    | 0.205 |
| hsa-let-7b NXN      | -0.4586419  | 0.0009186272 | 0.097 |
| hsa-let-7b PGRMC1   | -0.4524381  | 0.0001544305 | 0.035 |
| hsa-let-7b POLD2    | -0.08616277 | 0.5560856    | 0.039 |
| hsa-let-7b POLR2C   | 0.1588886   | 0.2755137    | 0.092 |
| hsa-let-7b POM121   | -0.5518096  | 3.958203e-05 | 0.075 |
| hsa-let-7b PPP1R7   | 0.5888693   | 8.556173e-06 | 0.932 |
| hsa-let-7b PRIM1    | -0.7258323  | 3.613743e-09 | 0.001 |
| hsa-let-7b PTGS2    | 0.06637355  | 0.6504617    | 0.129 |
| hsa-let-7b PXDN     | -0.1918958  | 0.1835513    | 0.002 |
| hsa-let-7b RDH10    | -0.1600528  | 0.1098617    | 0.099 |
| hsa-let-7b RHOB     | 0.11382     | 0.3666431    | 0.05  |
| hsa-let-7b RHOG     | 0.4743881   | 0.0005739804 | 0.915 |
| hsa-let-7b RPIA     | -0.2696862  | 0.0609365    | 0.039 |
| hsa-let-7b SCYL1    | 0.2739952   | 0.05676855   | 0.448 |
| hsa-let-7b SLC1A4   | 0.45157     | 0.0001595735 | 0.058 |
| hsa-let-7b SLC25A1  | 0.3210604   | 0.02449207   | 0.283 |
| hsa-let-7b SLC25A13 | -0.743042   | 9.730502e-10 | 0.003 |
| hsa-let-7b SLC25A24 | 0.02880255  | 0.7749407    | 0.261 |
| hsa-let-7b SLC25A32 | -0.3755973  | 0.002048293  | 0.063 |
| hsa-let-7b SLC38A1  | -0.8381271  | 5.82116e-14  | 0.011 |
| hsa-let-7b SNAP23   | -0.2468753  | 0.08724803   | 0.046 |
| hsa-let-7b SPCS3    | 0.1782256   | 0.2204958    | 0.242 |
| hsa-let-7b SYPL1    | -0.08897851 | 0.4809046    | 0.101 |
| hsa-let-7b TAF9B    | 0.4107805   | 0.003369495  | 0.126 |
| hsa-let-7b THBS1    | 0.1751004   | 0.2288275    | 0.033 |
| hsa-let-7b TMEM2    | -0.5466819  | 4.824157e-05 | 0.001 |
| hsa-let-7b TPM2     | 0.2927338   | 0.02295941   | 0.14  |
| hsa-let-7b TRMT1    | -0.6725198  | 1.207225e-07 | 0.021 |
| hsa-let-7b TYMS     | -0.1112316  | 0.4467249    | 0.172 |
| hsa-let-7b UHRF1    | -0.2161677  | 0.1357484    | 0.044 |
| hsa-let-7b VPS39    | 0.4516472   | 0.001124064  | 0.69  |
| hsa-let-7c BCL2     | -0.01658407 | 0.8956806    | 0.169 |
| hsa-let-7c BCL2L1   | 0.1631323   | 0.2627268    | 0.215 |
| hsa-let-7c CDC25A   | 0.1221216   | 0.3324927    | 0.081 |
| hsa-let-7c HMGA2    | -0.4896264  | 0.0003562174 | 0.031 |
| hsa-let-7c MED28    | -0.03946782 | 0.7549286    | 0.231 |
| hsa-let-7c MYC      | -0.07187291 | 0.5693893    | 0.059 |
| hsa-let-7c RTCD1    | -0.2336847  | 0.1060884    | 0.025 |
| hsa-let-7c TRIM71   | -0.5443716  | 5.268387e-05 | 0.007 |
| hsa-let-7d BCL2     | 0.1731053   | 0.1679024    | 0.047 |
| hsa-let-7d BDNF     | -0.07065691 | 0.6294978    | 0.132 |
| hsa-let-7d CDC25A   | 0.171538    | 0.1718445    | 0.047 |
| hsa-let-7d DAD1     | 0.1509467   | 0.3005303    | 0.183 |
| hsa-let-7d DICER1   | -0.4086574  | 0.003554423  | 0.029 |
| hsa-let-7d EIF4G2   | 0.2850334   | 0.04713135   | 0.288 |

Table S2. Results obtained for the test on experimentally validated targets

|                     |             |              |       |
|---------------------|-------------|--------------|-------|
| hsa-let-7d HMGA2    | -0.6109063  | 3.134776e-06 | 0.013 |
| hsa-let-7d KRAS     | -0.3660493  | 0.009691195  | 0.036 |
| hsa-let-7d RABGAP1L | 0.1662569   | 0.1856255    | 0.032 |
| hsa-let-7d SMOX     | -0.1446392  | 0.2503297    | 0.077 |
| hsa-let-7e DAD1     | 0.378149    | 0.007384475  | 0.45  |
| hsa-let-7e HMGA2    | -0.5492061  | 4.378243e-05 | 0.095 |
| hsa-let-7e RABGAP1L | -0.2289401  | 0.06659361   | 0.091 |
| hsa-let-7f ASS1     | -0.3126599  | 0.02872207   | 0.061 |
| hsa-let-7f EEF1A2   | 0.211677    | 0.1442652    | 0.13  |
| hsa-let-7f ESM1     | 0.2317013   | 0.1091725    | 0.035 |
| hsa-let-7f FDPS     | -0.2411962  | 0.09501088   | 0.046 |
| hsa-let-7f NTS      | -0.1584335  | 0.2769087    | 0.096 |
| hsa-let-7f VIM      | 0.5453625   | 5.073465e-05 | 0.014 |
| hsa-let-7g BCL2L1   | -0.03575803 | 0.8072909    | 0.03  |
| hsa-let-7g CDC25A   | 0.03991758  | 0.7522248    | 0.094 |
| hsa-let-7g COL1A2   | -0.2228753  | 0.07433714   | 0.022 |
| hsa-let-7g DAD1     | 0.2986642   | 0.0371131    | 0.378 |
| hsa-let-7g EIF4G2   | 0.04769798  | 0.7448391    | 0.167 |
| hsa-let-7g HMGA2    | -0.6924704  | 3.54496e-08  | 0.002 |
| hsa-let-7g KRAS     | -0.3957401  | 0.004884194  | 0.028 |
| hsa-let-7g MYC      | -0.09076987 | 0.5110749    | 0.101 |
| hsa-let-7i DAD1     | 0.3634173   | 0.01026808   | 0.313 |
| hsa-let-7i EIF4G2   | 0.158574    | 0.2764775    | 0.252 |
| hsa-miR-100 EGR2    | 0.196477    | 0.1685211    | 0.125 |
| hsa-miR-100 FGFR3   | -0.6839836  | 6.402719e-09 | 0.001 |
| hsa-miR-100 ID1     | -0.7504285  | 5.365552e-10 | 0.013 |
| hsa-miR-100 IGF1R   | 0.259781    | 0.036635     | 0.026 |
| hsa-miR-100 PLK1    | -0.6646694  | 1.90644e-07  | 0.006 |
| hsa-miR-101 APP     | 0.3368028   | 0.01796431   | 0.112 |
| hsa-miR-101 ATXN1   | -0.2341479  | 0.0604741    | 0.024 |
| hsa-miR-101 EZH2    | 0.2414747   | 0.05264294   | 0.031 |
| hsa-miR-101 FOS     | 0.305379    | 0.01337316   | 0.114 |
| hsa-miR-101 MCL1    | 0.3142049   | 0.0108045    | 0.048 |
| hsa-miR-101 MYCN    | 0.427625    | 0.0009290042 | 0.021 |
| hsa-miR-103 GPD1    | -0.04752446 | 0.7457363    | 0.409 |
| hsa-miR-103 SERBP1  | 0.4538573   | 0.0001463499 | 0.048 |
| hsa-miR-105 TLR2    | -0.1048829  | 0.1476713    | 0.05  |
| hsa-miR-106a APP    | 0.4182501   | 0.002784466  | 0.594 |
| hsa-miR-106a CDKN1A | -0.6188423  | 2.142738e-06 | 0.005 |
| hsa-miR-106a RB1    | -0.1525473  | 0.2953743    | 0.179 |
| hsa-miR-106b APP    | 0.3553162   | 0.01223298   | 0.001 |
| hsa-miR-106b CDKN1A | -0.5259601  | 0.000103938  | 0.006 |
| hsa-miR-106b ITCH   | 0.4990773   | 0.0002619916 | 0.001 |
| hsa-miR-106b PCAF   | -0.2740491  | 0.0001198467 | 0.003 |
| hsa-miR-107 BACE1   | -0.04100973 | 0.7796501    | 0.062 |
| hsa-miR-107 CCNE1   | -0.1790289  | 0.2183887    | 0.187 |
| hsa-miR-107 CDCA4   | -0.2066477  | 0.1542669    | 0.257 |
| hsa-miR-107 HIF1A   | -0.2083714  | 0.1507832    | 0.063 |
| hsa-miR-107 RAB1B   | -0.2889339  | 0.02927235   | 0.121 |
| hsa-miR-107 SERBP1  | -0.2420301  | 0.09383859   | 0.018 |
| hsa-miR-10a USF2    | 0.2489055   | 0.000498861  | 0.142 |
| hsa-miR-10b HOXD10  | -0.3754918  | 0.002054735  | 0.043 |
| hsa-miR-10b KLF4    | 0.1602604   | 0.02638452   | 0.04  |

Table S2.Results obtained for the test on experimentally validated targets

|                       |             |              |       |
|-----------------------|-------------|--------------|-------|
| hsa-miR-124a CDK2     | 0.2485469   | 0.08506008   | 0.261 |
| hsa-miR-124a NR3C1    | -0.3263581  | 0.02210314   | 0.182 |
| hsa-miR-125a ARID3B   | -0.7109822  | 1.038554e-08 | 0.035 |
| hsa-miR-125a ERBB2    | -0.05958108 | 0.5208977    | 0.273 |
| hsa-miR-125a ERBB3    | -0.7265441  | 4.284935e-12 | 0.001 |
| hsa-miR-125a LIF      | 0.3179173   | 0.02600911   | 0.475 |
| hsa-miR-125a RARA     | 0.354925    | 0.01233551   | 0.31  |
| hsa-miR-125b ADAMTS1  | 0.5258407   | 4.884981e-15 | 0.182 |
| hsa-miR-125b BAK1     | -0.02426557 | 0.8685518    | 0.198 |
| hsa-miR-125b CASP6    | -0.2369892  | 0.05733215   | 0.046 |
| hsa-miR-125b CASP7    | -0.2787363  | 0.02455045   | 0.021 |
| hsa-miR-125b CBX7     | 0.1033495   | 0.1537171    | 0.061 |
| hsa-miR-125b CDC25A   | 0.08806913  | 0.4854172    | 0.254 |
| hsa-miR-125b CDK6     | -0.07836291 | 0.279964     | 0.096 |
| hsa-miR-125b CDKN2A   | -0.5016648  | 1.241865e-13 | 0.004 |
| hsa-miR-125b CEBPG    | -0.4504165  | 8.032627e-10 | 0.003 |
| hsa-miR-125b CLU      | 0.4050517   | 5.62243e-09  | 0.239 |
| hsa-miR-125b CYP1A1   | 0.2573451   | 0.0003139886 | 0.351 |
| hsa-miR-125b DICER1   | -0.5581528  | 3.084876e-05 | 0.006 |
| hsa-miR-125b EIF4EBP1 | -0.3045566  | 0.009769531  | 0.021 |
| hsa-miR-125b ERBB2    | 0.06835033  | 0.3461887    | 0.522 |
| hsa-miR-125b ERBB3    | -0.6663427  | 3.549734e-20 | 0.001 |
| hsa-miR-125b GPR160   | -0.7859238  | 2.238764e-11 | 0.025 |
| hsa-miR-125b H3F3B    | 0.1950851   | 0.1791779    | 0.046 |
| hsa-miR-125b HMGA1    | -0.5778549  | 1.702192e-18 | 0.001 |
| hsa-miR-125b HMGA2    | -0.4876672  | 0.0003792243 | 0.043 |
| hsa-miR-125b HOMER2   | 0.1156929   | 0.1100452    | 0.071 |
| hsa-miR-125b ID1      | -0.7558865  | 5.444978e-12 | 0.025 |
| hsa-miR-125b ID2      | 0.4890366   | 6.148415e-13 | 0.015 |
| hsa-miR-125b ID3      | 0.5102647   | 4.019007e-14 | 0.106 |
| hsa-miR-125b IGFBP3   | 0.4436844   | 1.152158e-10 | 0.044 |
| hsa-miR-125b IL1RN    | 0.2360832   | 0.0009785309 | 0.116 |
| hsa-miR-125b KLF13    | -0.4239697  | 8.907559e-10 | 0.001 |
| hsa-miR-125b LIF      | 0.2509828   | 0.08194883   | 0.391 |
| hsa-miR-125b MAN1A1   | 0.2395233   | 0.0008195596 | 0.129 |
| hsa-miR-125b NKIRAS2  | 0.5438102   | 5.381848e-05 | 0.398 |
| hsa-miR-125b ODZ2     | 0.183365    | 0.01090243   | 0.409 |
| hsa-miR-125b PERP     | 0.1906387   | 0.008081323  | 0.181 |
| hsa-miR-125b PIGR     | 0.2672777   | 0.0001784376 | 0.001 |
| hsa-miR-125b RBM8A    | -0.3636073  | 2.172585e-07 | 0.008 |
| hsa-miR-125b SGPL1    | -0.1390221  | 0.05446545   | 0.083 |
| hsa-miR-125b SMO      | -0.2497887  | 0.0004756154 | 0.001 |
| hsa-miR-125b TP53     | -0.1949933  | 0.1195737    | 0.096 |
| hsa-miR-125b TSPAN8   | -0.3176039  | 0.009936101  | 0.007 |
| hsa-miR-125b UBE2I    | -0.4146308  | 0.002064801  | 0.051 |
| hsa-miR-125b UGT2B15  | 0.4537997   | 3.829737e-11 | 0.115 |
| hsa-miR-125b VDR      | -0.3884284  | 0.001386728  | 0.043 |
| hsa-miR-126 CCNE2     | -0.1053023  | 0.4038157    | 0.026 |
| hsa-miR-126 CRK       | 0.3346693   | 0.01094159   | 0.069 |
| hsa-miR-126 HOXA9     | -0.2578389  | 0.0381135    | 0.045 |
| hsa-miR-126 IRS1      | 0.1842435   | 0.1417768    | 0.076 |
| hsa-miR-126 PLK2      | 0.5403142   | 6.140316e-05 | 0.072 |
| hsa-miR-126 RGS3      | 0.3280045   | 0.02140193   | 0.028 |

Table S2. Results obtained for the test on experimentally validated targets

|                       |             |              |       |
|-----------------------|-------------|--------------|-------|
| hsa-miR-126* SLC45A3  | -0.2253663  | 0.0234547    | 0.162 |
| hsa-miR-126 SPRED1    | -0.6110765  | 3.109628e-06 | 0.068 |
| hsa-miR-126 TOM1      | -0.1851059  | 0.2029014    | 0.228 |
| hsa-miR-126 VCAM1     | 0.1290987   | 0.3385201    | 0.07  |
| hsa-miR-126 VEGFA     | -0.2121863  | 0.08971762   | 0.041 |
| hsa-miR-127 BCL6      | 0.3676859   | 0.009346755  | 0.11  |
| hsa-miR-127 XBP1      | 0.09023832  | 0.2768541    | 0.248 |
| hsa-miR-128b CDKN1B   | 0.4520484   | 0.001111255  | 0.164 |
| hsa-miR-128b EGFR     | -0.08582012 | 0.4966727    | 0.021 |
| hsa-miR-128b MLL      | -0.3419436  | 0.00530477   | 0.007 |
| hsa-miR-129 GALNT1    | 0.3531607   | 0.003906228  | 0.282 |
| hsa-miR-129 NOTCH1    | 0.1674018   | 0.1825723    | 0.06  |
| hsa-miR-129 SOX4      | -0.5438752  | 2.836423e-06 | 0.001 |
| hsa-miR-130a ATXN1    | 0.1423217   | 0.06587022   | 0.018 |
| hsa-miR-130a HOXA5    | 0.07495037  | 0.5795058    | 0.19  |
| hsa-miR-130a MAFB     | 0.2234703   | 0.07354707   | 0.108 |
| hsa-miR-130a NR3C2    | 0.1775533   | 0.02477174   | 0.041 |
| hsa-miR-130a TAC1     | -0.1454153  | 0.2477698    | 0.52  |
| hsa-miR-130b RUNX3    | -0.1961121  | 0.1174249    | 0.087 |
| hsa-miR-130b TP53INP1 | 0.11121     | 0.3894189    | 0.05  |
| hsa-miR-132 CDKN1A    | 0.310672    | 0.02980746   | 0.204 |
| hsa-miR-132 MECP2     | -0.3219216  | 0.008920927  | 0.215 |
| hsa-miR-132 RFX4      | 0.5219887   | 0.0001197348 | 0.047 |
| hsa-miR-132 SIRT1     | -0.1618853  | 0.2664422    | 0.158 |
| hsa-miR-133a CDC42    | 0.1000841   | 0.1672111    | 0.121 |
| hsa-miR-133a ERG      | 0.3586912   | 3.243089e-07 | 0.426 |
| hsa-miR-133a FSCN1    | -0.09086345 | 0.2100552    | 0.136 |
| hsa-miR-133a KLF15    | -0.01505819 | 0.8357743    | 0.068 |
| hsa-miR-133a KRT7     | 0.2299344   | 0.001334952  | 0.44  |
| hsa-miR-133a PKM2     | -0.1885394  | 0.008820102  | 0.217 |
| hsa-miR-133a RHOA     | -0.1982613  | 0.005839345  | 0.035 |
| hsa-miR-133a UCP2     | 0.0779702   | 0.2823885    | 0.204 |
| hsa-miR-133b BCL2L2   | -0.2822754  | 7.285828e-05 | 0.065 |
| hsa-miR-133b KLF15    | -0.05265717 | 0.4682201    | 0.061 |
| hsa-miR-133b MCL1     | 0.5463091   | 2.508197e-06 | 0.19  |
| hsa-miR-133b PKM2     | -0.1603728  | 0.0262777    | 0.123 |
| hsa-miR-135a APC      | 0.1601558   | 0.2716531    | 0.067 |
| hsa-miR-135a NR3C2    | -0.3370263  | 1.752329e-06 | 0.001 |
| hsa-miR-135b APC      | 0.6254547   | 1.547999e-06 | 0.027 |
| hsa-miR-137 CDK6      | -0.0131021  | 0.8568619    | 0.046 |
| hsa-miR-137 NCOA2     | 0.3945184   | 0.00114602   | 0.058 |
| hsa-miR-138 ARHGEF3   | 0.2382757   | 0.0008742412 | 0.165 |
| hsa-miR-138 RHOC      | -0.229659   | 0.001353402  | 0.003 |
| hsa-miR-138 ROCK2     | -0.1059507  | 0.143569     | 0.243 |
| hsa-miR-140 CXCL12    | -0.5206943  | 0.0001253385 | 0.069 |
| hsa-miR-140 HDAC4     | 0.1176058   | 0.4209428    | 0.149 |
| hsa-miR-141 BAP1      | -0.09748347 | 0.1785748    | 0.001 |
| hsa-miR-141 BRD3      | -0.09753425 | 0.5049593    | 0.044 |
| hsa-miR-141 DLX5      | -0.1769701  | 0.2238175    | 0.269 |
| hsa-miR-141 ELMO2     | 0.1038903   | 0.151564     | 0.255 |
| hsa-miR-141 ERBB2IP   | -0.7593544  | 2.541148e-10 | 0.001 |
| hsa-miR-141 HMGB1     | -0.09293136 | 0.1998208    | 0.041 |
| hsa-miR-141 KLF5      | 0.355797    | 4.092884e-07 | 0.163 |

Table S2. Results obtained for the test on experimentally validated targets

|                      |             |              |       |
|----------------------|-------------|--------------|-------|
| hsa-miR-141 PTEN     | -0.0555048  | 0.4444713    | 0.142 |
| hsa-miR-141 SERBP1   | 0.5947104   | 6.604362e-06 | 0.027 |
| hsa-miR-141 SFPQ     | 0.2625168   | 0.0684116    | 0.033 |
| hsa-miR-141 STK3     | -0.02533947 | 0.862789     | 0.112 |
| hsa-miR-141 TGFB2    | -0.3503037  | 0.01360354   | 0.101 |
| hsa-miR-141 UBAP1    | -0.5366336  | 7.043539e-05 | 0.013 |
| hsa-miR-141 ZEB1     | -0.3559014  | 0.01208096   | 0.071 |
| hsa-miR-141 ZEB2     | -0.1808074  | 0.02548856   | 0.105 |
| hsa-miR-141 ZFH1B    | -0.1018293  | 0.3109312    | 0.061 |
| hsa-miR-143 DNMT3A   | -0.3506425  | 6.159756e-07 | 0.182 |
| hsa-miR-143 ELK1     | 0.06402099  | 0.662092     | 0.381 |
| hsa-miR-143 FNDC3B   | 0.5833707   | 1.08681e-05  | 0.056 |
| hsa-miR-143 KLF4     | 0.2989176   | 0.0009660595 | 0.277 |
| hsa-miR-143 KRAS     | 0.1714961   | 0.2305563    | 0.097 |
| hsa-miR-143 MYO6     | -0.2324533  | 0.0309112    | 0.033 |
| hsa-miR-145 ACBD3    | 0.6569536   | 2.948682e-07 | 0.128 |
| hsa-miR-145 BNIP3    | 0.2833011   | 0.04854898   | 0.003 |
| hsa-miR-145 CBFB     | 0.3692756   | 1.357465e-07 | 0.157 |
| hsa-miR-145 CCDC25   | -0.4548044  | 0.001026731  | 0.034 |
| hsa-miR-145 CCNA2    | -0.3494647  | 0.0138453    | 0.023 |
| hsa-miR-145 CDKN1A   | 0.3724567   | 0.002104753  | 0.129 |
| hsa-miR-145 CLINT1   | 0.638011    | 8.174064e-07 | 0.068 |
| hsa-miR-145 ELK1     | 0.4893025   | 0.0003599316 | 0.143 |
| hsa-miR-145 FBXO28   | -0.3215282  | 0.02427276   | 0.015 |
| hsa-miR-145 FLI1     | 0.5773037   | 9.960166e-11 | 0.008 |
| hsa-miR-145 FSCN1    | 0.1606758   | 0.2010378    | 0.071 |
| hsa-miR-145 HOXA9    | -0.2016059  | 0.1073009    | 0.069 |
| hsa-miR-145 IGF1R    | 0.1875219   | 0.1624678    | 0.135 |
| hsa-miR-145 IRS1     | -0.198779   | 0.005709503  | 0.026 |
| hsa-miR-145 KLF4     | 0.6794414   | 7.976702e-08 | 0.023 |
| hsa-miR-145 KLF5     | 0.161362    | 0.08188985   | 0.073 |
| hsa-miR-145 KRT7     | 0.1744363   | 0.01552653   | 0.283 |
| hsa-miR-145 MUC1     | -0.07557581 | 0.5496092    | 0.333 |
| hsa-miR-145 MYC      | 0.4894228   | 0.0003585481 | 0.02  |
| hsa-miR-145 MYO6     | -0.2510273  | 0.0004447019 | 0.032 |
| hsa-miR-145 PPP3CA   | 0.3792073   | 5.824831e-08 | 0.054 |
| hsa-miR-145 RASA1    | 0.6502812   | 4.257028e-07 | 0.201 |
| hsa-miR-145 RTKN     | -0.328272   | 0.0001936076 | 0.002 |
| hsa-miR-145 SOX2     | -0.01248093 | 0.9213956    | 0.246 |
| hsa-miR-145 STAT1    | 0.6185424   | 2.174181e-06 | 0.041 |
| hsa-miR-145 TMOD3    | -0.1421678  | 0.1079645    | 0.237 |
| hsa-miR-145 USP46    | 0.113604    | 0.3675589    | 0.069 |
| hsa-miR-145 YES1     | -0.2485956  | 0.06222843   | 0.045 |
| hsa-miR-146a ATO8    | 0.2847596   | 0.001874313  | 0.055 |
| hsa-miR-146a BLMH    | 0.08837268  | 0.2228754    | 0.125 |
| hsa-miR-146a BRCA1   | 0.1933897   | 0.1227056    | 0.102 |
| hsa-miR-146a BRCA2   | 0.1033395   | 0.4126837    | 0.2   |
| hsa-miR-146a CCNA2   | 0.2959142   | 0.01669698   | 0.054 |
| hsa-miR-146a CDKN3   | -0.2515377  | 0.0004325132 | 0.014 |
| hsa-miR-146a CFH     | 0.1619444   | 0.2662653    | 0.022 |
| hsa-miR-146a COL13A1 | -0.1113235  | 0.2677278    | 0.225 |
| hsa-miR-146a CXCR4   | 0.4334456   | 3.387988e-10 | 0.027 |
| hsa-miR-146a ELL3    | -0.3464057  | 8.573364e-07 | 0.019 |

Table S2.Results obtained for the test on experimentally validated targets

|                       |              |              |       |
|-----------------------|--------------|--------------|-------|
| hsa-miR-146a FADD     | -0.003001539 | 0.9670415    | 0.024 |
| hsa-miR-146a FAF1     | -0.2869068   | 5.467421e-05 | 0.061 |
| hsa-miR-146a IL8      | 0.7103814    | 1.082376e-08 | 0.105 |
| hsa-miR-146a IRAK1    | 0.5268933    | 0.0001005135 | 0.001 |
| hsa-miR-146a IRAK2    | -0.03998668  | 0.5818572    | 0.223 |
| hsa-miR-146a KIF22    | 0.2159961    | 0.083972     | 0.048 |
| hsa-miR-146a KIT      | 0.08606238   | 0.3921418    | 0.252 |
| hsa-miR-146a LTB      | 0.1066202    | 0.2885943    | 0.223 |
| hsa-miR-146a MCM10    | -0.276103    | 0.05481505   | 0.246 |
| hsa-miR-146a METTL7A  | -0.3426984   | 1.14045e-06  | 0.001 |
| hsa-miR-146a MR1      | -0.2028753   | 0.1050606    | 0.108 |
| hsa-miR-146a NFIX     | 0.1421369    | 0.1562235    | 0.041 |
| hsa-miR-146a PA2G4    | -0.1755517   | 0.02012274   | 0.014 |
| hsa-miR-146a PBLD     | 0.1439221    | 0.04641482   | 0.019 |
| hsa-miR-146a PDIK1L   | -0.2837648   | 0.04816616   | 0.133 |
| hsa-miR-146a PEX11G   | 0.1053686    | 0.1457942    | 0.08  |
| hsa-miR-146a PLEKHA4  | -0.1482018   | 0.3095068    | 0.02  |
| hsa-miR-146a POLE2    | -0.3247429   | 4.31604e-06  | 0.028 |
| hsa-miR-146a RAD54L   | -0.154775    | 0.1371114    | 0.082 |
| hsa-miR-146a ROCK1    | 0.02202528   | 0.8617483    | 0.242 |
| hsa-miR-146a SDCBP2   | 0.07306168   | 0.4677821    | 0.165 |
| hsa-miR-146a STAT1    | 0.5986779    | 1.338272e-10 | 0.029 |
| hsa-miR-146a TBP      | -0.3343969   | 2.132286e-06 | 0.03  |
| hsa-miR-146a TIMELESS | -0.2198068   | 0.002188389  | 0.001 |
| hsa-miR-146a TLR2     | 0.3419869    | 1.204147e-06 | 0.82  |
| hsa-miR-146a TMSL8    | -0.01356267  | 0.892918     | 0.06  |
| hsa-miR-146a TRIM14   | 0.336592     | 1.810294e-06 | 0.213 |
| hsa-miR-146a UHRF1    | -0.4064178   | 0.003759119  | 0.12  |
| hsa-miR-146a VWCE     | -0.08306131  | 0.4089211    | 0.256 |
| hsa-miR-146b MMP16    | -0.04303823  | 0.7335474    | 0.119 |
| hsa-miR-148a DNMT1    | 0.6248662    | 7.92931e-11  | 0.004 |
| hsa-miR-148a DNMT3B   | 0.668204     | 1.554565e-07 | 0.05  |
| hsa-miR-148a TGIF2    | 0.4885141    | 2.191562e-07 | 0.03  |
| hsa-miR-150 CCNE1     | -0.2890209   | 4.787799e-05 | 0.016 |
| hsa-miR-150 EGR2      | 0.437572     | 2.203091e-10 | 0.113 |
| hsa-miR-150 MYB       | -0.02614408  | 0.795235     | 0.147 |
| hsa-miR-152 DNMT1     | -0.4906874   | 0.0003442931 | 0.02  |
| hsa-miR-152 FOXO1     | -0.3488771   | 0.01401682   | 0.074 |
| hsa-miR-153 FOXO1     | -0.2211483   | 0.126748     | 0.179 |
| hsa-miR-153 MCL1      | -0.1271706   | 0.3838871    | 0.192 |
| hsa-miR-155 AGTR1     | -0.09403039  | 0.4562471    | 0.038 |
| hsa-miR-155 AMIGO2    | 0.2906589    | 0.04275849   | 0.063 |
| hsa-miR-155 ANKFY1    | -0.1497142   | 0.3045402    | 0.124 |
| hsa-miR-155 APC       | -0.2525928   | 0.07994202   | 0.149 |
| hsa-miR-155 ARFIP1    | -0.03627361  | 0.774214     | 0.196 |
| hsa-miR-155 ARFIP2    | -0.02943504  | 0.770134     | 0.196 |
| hsa-miR-155 ARID2     | -0.5381865   | 6.648567e-05 | 0.015 |
| hsa-miR-155 ARNTL     | -0.4791963   | 0.0004949488 | 0.032 |
| hsa-miR-155 ATG3      | 0.2752449    | 0.05560361   | 0.207 |
| hsa-miR-155 ATP6V1C1  | -0.101918    | 0.4191754    | 0.054 |
| hsa-miR-155 BACH1     | 0.02330387   | 0.8737182    | 0.126 |
| hsa-miR-155 BET1      | 0.04893475   | 0.7384546    | 0.276 |
| hsa-miR-155 BRPF3     | 0.04157671   | 0.7766814    | 0.155 |

Table S2.Results obtained for the test on experimentally validated targets

|                      |             |              |       |
|----------------------|-------------|--------------|-------|
| hsa-miR-155 CBFB     | 0.5015867   | 0.0002411035 | 0.298 |
| hsa-miR-155 CCND1    | 0.1676901   | 0.1073844    | 0.181 |
| hsa-miR-155 CDK5RAP3 | -0.2071263  | 0.1532936    | 0.271 |
| hsa-miR-155 CEBPB    | -0.07737411 | 0.5401239    | 0.113 |
| hsa-miR-155 CHAF1A   | -0.4327653  | 0.001898347  | 0.067 |
| hsa-miR-155 CLDN1    | 0.1831291   | 0.1442444    | 0.111 |
| hsa-miR-155 CSF1R    | 0.2352882   | 0.01785853   | 0.21  |
| hsa-miR-155 CTNNB1   | -0.3050201  | 0.03308129   | 0.093 |
| hsa-miR-155 CUL4B    | 0.4206671   | 0.002615413  | 0.111 |
| hsa-miR-155 CYP51A1  | -0.2881957  | 0.04463052   | 0.091 |
| hsa-miR-155 CYR61    | 0.557439    | 3.173444e-05 | 0.154 |
| hsa-miR-155 DHX40    | -0.3327499  | 0.0194848    | 0.125 |
| hsa-miR-155 DNAJB1   | 0.04308275  | 0.7688111    | 0.154 |
| hsa-miR-155 DNAJC19  | -0.4107226  | 0.003374427  | 0.049 |
| hsa-miR-155 DPP7     | 0.1118124   | 0.4443404    | 0.242 |
| hsa-miR-155 DSG2     | -0.3900856  | 0.005591681  | 0.14  |
| hsa-miR-155 FADS1    | -0.1246549  | 0.2915977    | 0.049 |
| hsa-miR-155 FADS3    | 0.4920713   | 0.0003292821 | 0.191 |
| hsa-miR-155 FMNL2    | -0.1618763  | 0.2664692    | 0.11  |
| hsa-miR-155 FOXO3    | -0.3207154  | 0.02465491   | 0.057 |
| hsa-miR-155 GNA13    | -0.4238596  | 0.002406067  | 0.03  |
| hsa-miR-155 HIF1A    | -0.08460686 | 0.5632662    | 0.191 |
| hsa-miR-155 HIVEP2   | -0.06980698 | 0.4878917    | 0.054 |
| hsa-miR-155 HSD17B12 | -0.2744379  | 0.05635362   | 0.061 |
| hsa-miR-155 JARID2   | -0.5177574  | 0.0001389492 | 0.015 |
| hsa-miR-155 KIAA0776 | 0.08800514  | 0.4857355    | 0.024 |
| hsa-miR-155 LDOC1    | 0.2855967   | 0.04667777   | 0.039 |
| hsa-miR-155 LPL      | -0.2820316  | 0.04960969   | 0.095 |
| hsa-miR-155 LY6K     | 0.03532605  | 0.7258038    | 0.224 |
| hsa-miR-155 MATR3    | -0.5232042  | 0.0001146817 | 0.028 |
| hsa-miR-155 MECP2    | 0.1048064   | 0.4060456    | 0.312 |
| hsa-miR-155 MEIS1    | -0.1616237  | 0.1063723    | 0.044 |
| hsa-miR-155 MET      | 0.2778624   | 0.02502201   | 0.117 |
| hsa-miR-155 METTL7A  | -0.3603769  | 0.01097106   | 0.093 |
| hsa-miR-155 MLH1     | -0.3000942  | 0.03617238   | 0.212 |
| hsa-miR-155 MOSC1    | -0.6301582  | 1.22272e-06  | 0.035 |
| hsa-miR-155 MPZL1    | 0.3030854   | 0.03426818   | 0.169 |
| hsa-miR-155 MSH2     | -0.422895   | 0.0024677    | 0.165 |
| hsa-miR-155 MSH6     | -0.4993733  | 0.0002594447 | 0.027 |
| hsa-miR-155 MSI2     | 0.06636399  | 0.5096546    | 0.112 |
| hsa-miR-155 MYO10    | 0.09191875  | 0.4664684    | 0.141 |
| hsa-miR-155 NARS     | -0.5418426  | 5.797436e-05 | 0.04  |
| hsa-miR-155 NT5E     | 0.3119921   | 0.01140458   | 0.111 |
| hsa-miR-155 PDLIM5   | 0.1317045   | 0.295655     | 0.134 |
| hsa-miR-155 PHC2     | 0.07565672  | 0.6053887    | 0.329 |
| hsa-miR-155 PHF17    | -0.3299902  | 0.02058118   | 0.18  |
| hsa-miR-155 PICALM   | 0.3062056   | 0.03237102   | 0.038 |
| hsa-miR-155 PLXND1   | 0.7086313   | 1.220132e-08 | 0.071 |
| hsa-miR-155 PODXL    | -0.349007   | 0.01397874   | 0.179 |
| hsa-miR-155 POLE3    | -0.01907271 | 0.8965078    | 0.022 |
| hsa-miR-155 POLE4    | 0.3147075   | 0.02763867   | 0.523 |
| hsa-miR-155 PPL      | 0.2224291   | 0.0749341    | 0.193 |
| hsa-miR-155 PRAF2    | 0.1511075   | 0.3000099    | 0.029 |



Table S2. Results obtained for the test on experimentally validated targets

|                      |             |              |       |
|----------------------|-------------|--------------|-------|
| hsa-miR-155 RAB23    | 0.1182886   | 0.418232     | 0.109 |
| hsa-miR-155 RAB34    | 0.1264249   | 0.2100639    | 0.051 |
| hsa-miR-155 RAB5C    | 0.1265608   | 0.3861902    | 0.217 |
| hsa-miR-155 RAB6A    | -0.03066003 | 0.8343477    | 0.156 |
| hsa-miR-155 RAI14    | 0.6122904   | 2.935704e-06 | 0.09  |
| hsa-miR-155 RCN2     | -0.4369425  | 0.001694872  | 0.04  |
| hsa-miR-155 RCOR1    | -0.03916061 | 0.7567772    | 0.25  |
| hsa-miR-155 RHEB     | -0.07351535 | 0.6156655    | 0.332 |
| hsa-miR-155 RHOA     | 0.5387719   | 6.505025e-05 | 0.583 |
| hsa-miR-155 SDCBP    | -0.01813255 | 0.9015835    | 0.06  |
| hsa-miR-155 SH3BP4   | 0.2602205   | 0.03630711   | 0.122 |
| hsa-miR-155 SLA      | -0.129819   | 0.3739794    | 0.197 |
| hsa-miR-155 SMAD1    | -0.06188117 | 0.6727396    | 0.229 |
| hsa-miR-155 SMAD5    | -0.1036844  | 0.4111171    | 0.283 |
| hsa-miR-155 SOCS1    | -0.3221705  | 0.02397435   | 0.124 |
| hsa-miR-155 SYPL1    | -0.1050102  | 0.4051282    | 0.105 |
| hsa-miR-155 TACSTD2  | 0.1545049   | 0.1229019    | 0.581 |
| hsa-miR-155 TBCA     | -0.2077991  | 0.1519334    | 0.151 |
| hsa-miR-155 TM6SF1   | 0.6114133   | 3.060444e-06 | 0.06  |
| hsa-miR-155 TP53INP1 | 0.08661912  | 0.5539878    | 0.075 |
| hsa-miR-155 TRAM1    | 0.2954821   | 0.03927876   | 0.005 |
| hsa-miR-155 TRIP13   | -0.2051985  | 0.1572413    | 0.105 |
| hsa-miR-155 TXNDC12  | -0.3632924  | 0.01029618   | 0.104 |
| hsa-miR-155 UBE2J1   | 0.7149884   | 7.862794e-09 | 0.269 |
| hsa-miR-155 VAMP3    | 0.5994744   | 5.326874e-06 | 0.055 |
| hsa-miR-155 WDFY1    | 0.2727117   | 0.05798528   | 0.122 |
| hsa-miR-155 ZIC3     | -0.4456102  | 0.001333423  | 0.092 |
| hsa-miR-155 ZNF652   | -0.1949509  | 0.1794832    | 0.081 |
| hsa-miR-15a ACTR1A   | 0.08883     | 0.5438777    | 0.053 |
| hsa-miR-15a BACE1    | 0.02922633  | 0.8419925    | 0.155 |
| hsa-miR-15a BCL2     | 0.1050918   | 0.4047612    | 0.104 |
| hsa-miR-15a BMI1     | 0.5203866   | 0.000126705  | 0.242 |
| hsa-miR-15a BRCA1    | -0.116257   | 0.3564034    | 0.194 |
| hsa-miR-15a CCND1    | -0.6366112  | 8.789675e-07 | 0.009 |
| hsa-miR-15a CCND2    | 0.4342908   | 0.001821649  | 0.008 |
| hsa-miR-15a CCNE1    | 0.1522423   | 0.2260208    | 0.125 |
| hsa-miR-15a CDC14B   | -0.3575799  | 0.01165392   | 0.042 |
| hsa-miR-15a CDC25A   | -0.1797909  | 0.1518287    | 0.132 |
| hsa-miR-15a CENPJ    | 0.08023591  | 0.5836664    | 0.153 |
| hsa-miR-15a DMTF1    | 0.1022852   | 0.4843332    | 0.195 |
| hsa-miR-15a ECHDC1   | -0.1144846  | 0.4334599    | 0.395 |
| hsa-miR-15a GOLGA5   | -0.1683462  | 0.2475678    | 0.212 |
| hsa-miR-15a GOLPH3L  | -0.1623302  | 0.2651127    | 0.084 |
| hsa-miR-15a H3F3B    | 0.37756     | 0.007484577  | 0.052 |
| hsa-miR-15a HDHD2    | 0.3529504   | 0.01286433   | 0.241 |
| hsa-miR-15a HERC6    | 0.02957679  | 0.8150781    | 0.07  |
| hsa-miR-15a HRSP12   | 0.1253111   | 0.3909355    | 0.345 |
| hsa-miR-15a HSDL2    | 0.6560741   | 3.096522e-07 | 0.044 |
| hsa-miR-15a HSPA1A   | 0.1654295   | 0.1878549    | 0.414 |
| hsa-miR-15a JUN      | 0.07498899  | 0.5801002    | 0.074 |
| hsa-miR-15a MCL1     | -0.3901632  | 0.005581402  | 0.024 |
| hsa-miR-15a MSH2     | -0.1800174  | 0.2158152    | 0.154 |
| hsa-miR-15a PDCD4    | 0.1470254   | 0.3134059    | 0.201 |

Table S2.Results obtained for the test on experimentally validated targets

|                     |              |              |       |
|---------------------|--------------|--------------|-------|
| hsa-miR-15a PNN     | 0.05449326   | 0.6663704    | 0.162 |
| hsa-miR-15a PRIM1   | -0.08842667  | 0.5457154    | 0.125 |
| hsa-miR-15a RAB21   | 0.3398401    | 0.01689188   | 0.115 |
| hsa-miR-15a RAD51C  | 0.3406888    | 0.01660213   | 0.183 |
| hsa-miR-15a SLC35A1 | 0.08766914   | 0.5491751    | 0.199 |
| hsa-miR-15a SLC35B3 | -0.2069095   | 0.153734     | 0.072 |
| hsa-miR-15a TIA1    | 0.4920698    | 0.0003292984 | 0.155 |
| hsa-miR-15a TPI1    | -0.3598963   | 0.0110859    | 0.079 |
| hsa-miR-15a UGDH    | -0.1860567   | 0.2005503    | 0.016 |
| hsa-miR-15a UGP2    | -0.3967717   | 0.004763938  | 0.036 |
| hsa-miR-15b BCL2    | -0.1753626   | 0.1623415    | 0.032 |
| hsa-miR-15b CASP8   | 0.08552242   | 0.4981726    | 0.027 |
| hsa-miR-15b CCNE1   | -0.2236573   | 0.122388     | 0.101 |
| hsa-miR-15b RECK    | -0.4366234   | 0.0017097    | 0.033 |
| hsa-miR-16 ABHD10   | 0.2414288    | 0.09468274   | 0.142 |
| hsa-miR-16 ACTR1A   | -0.03937656  | 0.7882187    | 0.031 |
| hsa-miR-16 ACVR2A   | -0.1189218   | 0.3454107    | 0.036 |
| hsa-miR-16 ARHGDI A | -0.5483799   | 4.519843e-05 | 0.038 |
| hsa-miR-16 ARL2     | -0.1365916   | 0.3493481    | 0.068 |
| hsa-miR-16 ATG9A    | 0.4358114    | 0.0002849144 | 0.382 |
| hsa-miR-16 BCL2     | -0.2134465   | 0.08778383   | 0.009 |
| hsa-miR-16 BMI1     | 0.3099004    | 0.03023786   | 0.267 |
| hsa-miR-16 BRCA1    | -0.04596773  | 0.716153     | 0.214 |
| hsa-miR-16 CA12     | -0.0892593   | 0.541925     | 0.083 |
| hsa-miR-16 CAPRIN1  | 0.4469253    | 0.0001898617 | 0.159 |
| hsa-miR-16 CASP8    | 0.1832258    | 0.1440289    | 0.366 |
| hsa-miR-16 CCND1    | -0.7950686   | 8.950798e-12 | 0.001 |
| hsa-miR-16 CCND3    | -0.312367    | 0.02887989   | 0.082 |
| hsa-miR-16 CCNE1    | -0.2128561   | 0.0886857    | 0.161 |
| hsa-miR-16 CCNT2    | 0.4651008    | 0.0007595191 | 0.617 |
| hsa-miR-16 CDC14B   | -0.2501997   | 0.08293912   | 0.181 |
| hsa-miR-16 CDK1     | 0.2076667    | 0.1522003    | 0.117 |
| hsa-miR-16 CDK2     | 0.4719117    | 0.0006189677 | 0.355 |
| hsa-miR-16 CDK5RAP1 | 0.2007377    | 0.1666609    | 0.234 |
| hsa-miR-16 CENPJ    | 0.2887924    | 0.04417099   | 0.303 |
| hsa-miR-16 CFL2     | 0.2106717    | 0.1462249    | 0.17  |
| hsa-miR-16 CHORDC1  | 0.1524681    | 0.2956281    | 0.287 |
| hsa-miR-16 CRHBP    | -0.6911752   | 3.84982e-08  | 0.094 |
| hsa-miR-16 DNAJB4   | 0.0159794    | 0.899464     | 0.225 |
| hsa-miR-16 ECHDC1   | -0.002402306 | 0.9869296    | 0.237 |
| hsa-miR-16 EGFR     | -0.04575031  | 0.7174391    | 0.254 |
| hsa-miR-16 EIF4E    | -0.3617536   | 0.00306696   | 0.049 |
| hsa-miR-16 FGF2     | -0.3737242   | 0.002165506  | 0.028 |
| hsa-miR-16 FNDC3B   | 0.09752969   | 0.5049793    | 0.21  |
| hsa-miR-16 GALNT7   | 0.133658     | 0.2884864    | 0.158 |
| hsa-miR-16 GFM1     | 0.3518491    | 0.01316765   | 0.531 |
| hsa-miR-16 GFPT1    | -0.1616051   | 0.267282     | 0.014 |
| hsa-miR-16 GNL3L    | 0.2868471    | 0.04568342   | 0.208 |
| hsa-miR-16 GOLGA5   | -0.274048    | 0.05671894   | 0.047 |
| hsa-miR-16 GOLPH3L  | 0.04891314   | 0.738566     | 0.137 |
| hsa-miR-16 GSTM4    | 0.3296078    | 0.007335984  | 0.344 |
| hsa-miR-16 H3F3B    | 0.1968858    | 0.1751192    | 0.033 |
| hsa-miR-16 HARS     | -0.1933217   | 0.1832179    | 0.04  |

Table S2.Results obtained for the test on experimentally validated targets

|                     |              |              |       |
|---------------------|--------------|--------------|-------|
| hsa-miR-16 HARS2    | 0.6322824    | 1.097742e-06 | 0.875 |
| hsa-miR-16 HBXIP    | 0.2561913    | 0.07559634   | 0.756 |
| hsa-miR-16 HDHD2    | 0.3341921    | 0.01893171   | 0.583 |
| hsa-miR-16 HERC6    | -0.006811877 | 0.9570514    | 0.25  |
| hsa-miR-16 HMGA1    | -0.2493162   | 0.04519902   | 0.016 |
| hsa-miR-16 HMOX1    | 0.1263783    | 0.386881     | 0.221 |
| hsa-miR-16 HRSP12   | 0.1964326    | 0.1761345    | 0.276 |
| hsa-miR-16 HSDL2    | 0.4340485    | 0.001833644  | 0.019 |
| hsa-miR-16 HSPA1A   | 0.1851529    | 0.2027848    | 0.172 |
| hsa-miR-16 HSPA1B   | 0.3767001    | 0.007632842  | 0.135 |
| hsa-miR-16 IFRD1    | -0.2530299   | 0.04198863   | 0.057 |
| hsa-miR-16 IFRD2    | -0.3628225   | 0.01040248   | 0.129 |
| hsa-miR-16 IGF2R    | 0.2890356    | 0.01953584   | 0.137 |
| hsa-miR-16 IPO4     | -0.2856802   | 0.04661078   | 0.158 |
| hsa-miR-16 ITGA2    | -0.3701028   | 0.008857434  | 0.049 |
| hsa-miR-16 JUN      | -0.2983417   | 0.01578332   | 0.046 |
| hsa-miR-16 KCNN4    | -0.2734562   | 0.02751779   | 0.208 |
| hsa-miR-16 KPNA3    | 0.4950386    | 0.0002990744 | 0.265 |
| hsa-miR-16 LAMC1    | 0.109312     | 0.3860499    | 0.082 |
| hsa-miR-16 LYPLA2   | -0.3033397   | 0.03411023   | 0.034 |
| hsa-miR-16 MCL1     | -0.5420518   | 5.751881e-05 | 0.005 |
| hsa-miR-16 MLLT1    | -0.7650918   | 1.545014e-10 | 0.011 |
| hsa-miR-16 MLLT11   | 0.4240566    | 0.002393652  | 0.008 |
| hsa-miR-16 MRPL20   | 0.281913     | 0.04970976   | 0.114 |
| hsa-miR-16 MSH2     | 0.06050431   | 0.6796247    | 0.208 |
| hsa-miR-16 NOTCH2   | 0.1121927    | 0.3735788    | 0.272 |
| hsa-miR-16 PDCD4    | 0.08578305   | 0.557834     | 0.161 |
| hsa-miR-16 PHLDB2   | -0.1169422   | 0.4235868    | 0.05  |
| hsa-miR-16 PLK1     | 0.2331566    | 0.1069029    | 0.266 |
| hsa-miR-16 PNN      | 0.3452566    | 0.004851802  | 0.183 |
| hsa-miR-16 PPIF     | 0.2134294    | 0.0878099    | 0.1   |
| hsa-miR-16 PRIM1    | 0.1719043    | 0.2375699    | 0.198 |
| hsa-miR-16 PSAT1    | 0.3816306    | 0.006816172  | 0.2   |
| hsa-miR-16 PTGS2    | 0.01484186   | 0.9103825    | 0.281 |
| hsa-miR-16 RAB21    | 0.3086343    | 0.03095522   | 0.672 |
| hsa-miR-16 RAD51C   | 0.2455341    | 0.08903508   | 0.635 |
| hsa-miR-16 RARS     | -0.07011123  | 0.6321529    | 0.001 |
| hsa-miR-16 RECK     | 0.02103964   | 0.8859022    | 0.037 |
| hsa-miR-16 RTN4     | 0.4062695    | 0.003773024  | 0.065 |
| hsa-miR-16 SEC24A   | 0.1586915    | 0.2067312    | 0.216 |
| hsa-miR-16 SERPINE2 | 0.3123041    | 0.02891384   | 0.143 |
| hsa-miR-16 SHOC2    | 0.1443432    | 0.3224123    | 0.276 |
| hsa-miR-16 SLC16A3  | -0.1408233   | 0.2631782    | 0.17  |
| hsa-miR-16 SLC35A1  | -0.09132086  | 0.5325949    | 0.219 |
| hsa-miR-16 SLC35B3  | -0.2456611   | 0.08886468   | 0.013 |
| hsa-miR-16 SLC38A1  | -0.2856855   | 0.02106128   | 0.001 |
| hsa-miR-16 SLC7A1   | -0.4619961   | 0.0001070391 | 0.001 |
| hsa-miR-16 SNX15    | 0.1890288    | 0.1933247    | 0.241 |
| hsa-miR-16 SPTLC1   | -0.1049511   | 0.4729559    | 0.26  |
| hsa-miR-16 SQSTM1   | -0.0767887   | 0.5432029    | 0.183 |
| hsa-miR-16 SRPR     | -0.5174594   | 0.0001404029 | 0.017 |
| hsa-miR-16 SRPRB    | -0.1847602   | 0.2037611    | 0.022 |
| hsa-miR-16 TIA1     | 0.522962     | 0.0001156729 | 0.031 |

Table S2.Results obtained for the test on experimentally validated targets

|                     |             |              |       |
|---------------------|-------------|--------------|-------|
| hsa-miR-16 TMEM109  | -0.3677277  | 0.009338103  | 0.052 |
| hsa-miR-16 TMEM43   | 0.1707703   | 0.2407259    | 0.104 |
| hsa-miR-16 TOMM34   | 0.2766981   | 0.05427342   | 0.457 |
| hsa-miR-16 TPI1     | -0.2398914  | 0.09686794   | 0.116 |
| hsa-miR-16 TPM3     | -0.1347407  | 0.3559785    | 0.223 |
| hsa-miR-16 TXN2     | 0.3136902   | 0.02817257   | 0.483 |
| hsa-miR-16 UBE2S    | 0.2462861   | 0.0880296    | 0.374 |
| hsa-miR-16 UBE2V1   | -0.1799604  | 0.215963     | 0.058 |
| hsa-miR-16 UBE4A    | 0.05150746  | 0.7252298    | 0.143 |
| hsa-miR-16 UGDH     | -0.2915344  | 0.01846029   | 0.003 |
| hsa-miR-16 UGP2     | -0.05915358 | 0.6864043    | 0.31  |
| hsa-miR-16 VTI1B    | -0.2553805  | 0.07655886   | 0.157 |
| hsa-miR-16 YIF1B    | -0.3395605  | 0.01698828   | 0.054 |
| hsa-miR-16 ZNF622   | -0.4749991  | 0.000563343  | 0.134 |
| hsa-miR-17-3p VIM   | -0.2877132  | 0.04500495   | 0.269 |
| hsa-miR-17-5p BMPR2 | 0.1022628   | 0.4175956    | 0.186 |
| hsa-miR-17-5p CCND1 | -0.7916036  | 1.273634e-11 | 0.001 |
| hsa-miR-17-5p PTPRO | -0.2193438  | 0.0791668    | 0.188 |
| hsa-miR-181a BCL2   | 0.2142582   | 0.08655574   | 0.295 |
| hsa-miR-181a BDNF   | 0.1415086   | 0.2608386    | 0.038 |
| hsa-miR-181a GATA6  | 0.2069207   | 0.09816192   | 0.026 |
| hsa-miR-181a HOXA11 | -0.1338781  | 0.3590947    | 0.027 |
| hsa-miR-181a NLK    | -0.6343105  | 9.89604e-07  | 0.005 |
| hsa-miR-181a PLAG1  | 0.02216077  | 0.8609063    | 0.024 |
| hsa-miR-181b BCL2   | 0.2270442   | 0.06894131   | 0.112 |
| hsa-miR-181b GATA6  | 0.4178924   | 0.0005327353 | 0.016 |
| hsa-miR-181b GRIA2  | 0.4442284   | 0.001385981  | 0.018 |
| hsa-miR-181b NLK    | -0.5451199  | 5.120555e-05 | 0.038 |
| hsa-miR-181b PLAG1  | -0.0253037  | 0.8414191    | 0.043 |
| hsa-miR-181b TIMP3  | -0.2430529  | 0.05106939   | 0.086 |
| hsa-miR-181b VSNL1  | 0.2474067   | 0.04692676   | 0.008 |
| hsa-miR-181c BCL2   | 0.3697074   | 1.309202e-07 | 0.02  |
| hsa-miR-181c GATA6  | 0.1601449   | 0.02649464   | 0.048 |
| hsa-miR-181c KRAS   | -0.6930753  | 3.410467e-08 | 0.001 |
| hsa-miR-181c NLK    | -0.5572725  | 3.194439e-05 | 0.004 |
| hsa-miR-181c NOTCH2 | -0.118053   | 0.2035926    | 0.073 |
| hsa-miR-181c NOTCH4 | 0.109331    | 0.385967     | 0.246 |
| hsa-miR-182 ADCY6   | -0.4068969  | 0.002166153  | 0.118 |
| hsa-miR-182 CDKN1A  | -0.6432831  | 6.19783e-07  | 0.003 |
| hsa-miR-182 EP300   | -0.05754756 | 0.4278637    | 0.153 |
| hsa-miR-182 FOXO1   | 0.4274447   | 0.002188782  | 0.011 |
| hsa-miR-182 IGF1R   | -0.03091992 | 0.806839     | 0.108 |
| hsa-miR-182 MITF    | -0.04835116 | 0.5054187    | 0.179 |
| hsa-miR-182 RARG    | 0.02221907  | 0.8795521    | 0.174 |
| hsa-miR-183 BTRC    | 0.2225151   | 0.001921455  | 0.135 |
| hsa-miR-183 FOXO1   | 0.4412576   | 1.507293e-09 | 0.002 |
| hsa-miR-183 VIL2    | -0.09235567 | 0.202633     | 0.006 |
| hsa-miR-184 AKT2    | 0.08631515  | 0.2338771    | 0.038 |
| hsa-miR-185 CCNE1   | -0.1885458  | 0.1944863    | 0.07  |
| hsa-miR-185 CORO2B  | 0.1461462   | 0.3163405    | 0.01  |
| hsa-miR-185 HMGA2   | -0.367108   | 0.00946715   | 0.028 |
| hsa-miR-186 FOXO1   | 0.3079957   | 0.0313224    | 0.144 |
| hsa-miR-18a CTGF    | -0.1442449  | 0.3227452    | 0.022 |

Table S2.Results obtained for the test on experimentally validated targets

|                       |             |              |       |
|-----------------------|-------------|--------------|-------|
| hsa-miR-18a ESR1      | -0.6049967  | 1.491125e-20 | 0.001 |
| hsa-miR-18a* KRAS     | 0.6736914   | 1.126317e-07 | 0.181 |
| hsa-miR-18a PTEN      | -0.320267   | 5.936783e-06 | 0.002 |
| hsa-miR-18a THBS1     | -0.2336803  | 0.001105869  | 0.054 |
| hsa-miR-18b ESR1      | -0.1639119  | 0.101445     | 0.106 |
| hsa-miR-192 CDKN1A    | -0.3188589  | 0.0255466    | 0.141 |
| hsa-miR-192 DHFR      | 0.210777    | 0.1460187    | 0.246 |
| hsa-miR-193b CCND1    | 0.6521497   | 3.844518e-07 | 0.081 |
| hsa-miR-193b MCL1     | 0.4053876   | 0.0038567    | 0.041 |
| hsa-miR-195 BCL2L11   | -0.08353807 | 0.2493237    | 0.003 |
| hsa-miR-195 CCND1     | 0.4163453   | 0.0005614115 | 0.157 |
| hsa-miR-195 CDK6      | -0.2553006  | 0.0003517622 | 0.023 |
| hsa-miR-195 E2F3      | -0.4168126  | 1.812742e-09 | 0.036 |
| hsa-miR-195 MECP2     | 0.3279221   | 0.007660723  | 0.199 |
| hsa-miR-195 WEE1      | -0.1218181  | 0.3337045    | 0.062 |
| hsa-miR-196a ANXA1    | 0.4050955   | 0.003884777  | 0.231 |
| hsa-miR-196a BMP4     | 0.2508021   | 0.05876419   | 0.1   |
| hsa-miR-196a HOXA7    | 0.5008894   | 0.0002467503 | 0.017 |
| hsa-miR-196a HOXB8    | 0.2100843   | 0.1473791    | 0.016 |
| hsa-miR-196a HOXD8    | 0.4090203   | 0.003522196  | 0.054 |
| hsa-miR-196a KRT5     | 0.01767231  | 0.8607594    | 0.168 |
| hsa-miR-196a S100A9   | 0.09467472  | 0.346324     | 0.2   |
| hsa-miR-196b HOXB8    | 0.09489672  | 0.5166004    | 0.003 |
| hsa-miR-197 ACVR1     | 0.4668491   | 0.0007209425 | 0.139 |
| hsa-miR-197 TSPAN3    | 0.4792992   | 0.0004933696 | 0.305 |
| hsa-miR-199a ETS2     | 0.4640636   | 1.206368e-11 | 0.136 |
| hsa-miR-199a* ETS2    | 0.4459366   | 9.044032e-11 | 0.012 |
| hsa-miR-199a JUNB     | 0.5292794   | 3.108624e-15 | 0.106 |
| hsa-miR-199a* JUNB    | 0.5224726   | 7.549517e-15 | 0.311 |
| hsa-miR-199a LIF      | 0.3641415   | 0.01010648   | 0.48  |
| hsa-miR-199a MECP2    | 0.3267275   | 0.007898407  | 0.558 |
| hsa-miR-199a* MECP2   | 0.2365961   | 0.05775885   | 0.44  |
| hsa-miR-199a* MET     | -0.3262122  | 3.882811e-06 | 0.001 |
| hsa-miR-199a* SMAD1   | -0.6898517  | 4.186608e-08 | 0.014 |
| hsa-miR-199b-5p HES1  | -0.1002708  | 0.3184331    | 0.187 |
| hsa-miR-199b-5p LAMC2 | -0.03809603 | 0.7052581    | 0.081 |
| hsa-miR-199b LAMC2    | 0.3196532   | 0.02516186   | 0.072 |
| hsa-miR-199b SET      | -0.05798355 | 0.424366     | 0.064 |
| hsa-miR-19a ATXN1     | -0.1414372  | 0.2610816    | 0.073 |
| hsa-miR-19a CCND1     | -0.59669    | 6.042548e-06 | 0.004 |
| hsa-miR-19a CTGF      | -0.04928396 | 0.6966346    | 0.231 |
| hsa-miR-19a ERBB4     | -0.1674716  | 0.1823873    | 0.045 |
| hsa-miR-19a HOXA5     | 0.1994113   | 0.1695392    | 0.094 |
| hsa-miR-19a MECP2     | -0.07508941 | 0.5521885    | 0.104 |
| hsa-miR-19a NR4A2     | 0.114753    | 0.362702     | 0.18  |
| hsa-miR-19a PTEN      | -0.1832248  | 0.1440311    | 0.044 |
| hsa-miR-19a SOCS1     | 0.4689715   | 0.0006764836 | 0.168 |
| hsa-miR-19a THBS1     | 0.2164954   | 0.1351419    | 0.084 |
| hsa-miR-19b BACE1     | -0.6083468  | 3.536246e-06 | 0.053 |
| hsa-miR-19b CTGF      | -0.1419958  | 0.3304272    | 0.051 |
| hsa-miR-19b NR3C2     | 0.2009965   | 0.1083894    | 0.259 |
| hsa-miR-19b PTEN      | -0.05281908 | 0.676042     | 0.07  |
| hsa-miR-19b SOCS1     | 0.4168482   | 0.002886873  | 0.093 |

Table S2.Results obtained for the test on experimentally validated targets

|                    |              |              |       |
|--------------------|--------------|--------------|-------|
| hsa-miR-1 ABHD11   | 0.0004149727 | 0.996714     | 0.223 |
| hsa-miR-1 ACPL2    | -0.2236025   | 0.001822895  | 0.012 |
| hsa-miR-1 ADAR     | -0.4063773   | 8.426272e-05 | 0.001 |
| hsa-miR-1 ADPGK    | -0.0742451   | 0.3060877    | 0.078 |
| hsa-miR-1 AGMAT    | 0.2171797    | 0.002479118  | 0.319 |
| hsa-miR-1 AGRN     | -0.1565291   | 0.03014724   | 0.087 |
| hsa-miR-1 ANKIB1   | -0.004260144 | 0.9768237    | 0.099 |
| hsa-miR-1 ANP32B   | -0.1858702   | 0.009845526  | 0.052 |
| hsa-miR-1 ANPEP    | -0.2924539   | 0.04143508   | 0.167 |
| hsa-miR-1 ANXA2    | 0.2965701    | 0.0385269    | 0.019 |
| hsa-miR-1 AP3B1    | 0.5158682    | 1.520011e-05 | 0.001 |
| hsa-miR-1 AP3D1    | -0.1704763   | 0.01807416   | 0.008 |
| hsa-miR-1 ARCN1    | 0.4424394    | 0.001456767  | 0.019 |
| hsa-miR-1 ARF3     | -0.1671343   | 0.02049938   | 0.154 |
| hsa-miR-1 ARF4     | 0.3793174    | 0.007189338  | 0.013 |
| hsa-miR-1 ARHGEF18 | -0.2024455   | 0.00486153   | 0.123 |
| hsa-miR-1 ARID1A   | 0.05498905   | 0.5849506    | 0.269 |
| hsa-miR-1 ARID2    | -0.1864647   | 0.009608443  | 0.043 |
| hsa-miR-1 ASH2L    | -0.1802443   | 0.2152274    | 0.006 |
| hsa-miR-1 ATP6V0A1 | -0.2003955   | 0.005320568  | 0.012 |
| hsa-miR-1 ATP6V1B2 | -0.01720207  | 0.9066108    | 0.408 |
| hsa-miR-1 AXL      | 0.44855      | 6.813683e-11 | 0.033 |
| hsa-miR-1 BCKDHB   | 0.2023232    | 0.004887895  | 0.298 |
| hsa-miR-1 BCL2     | 0.4444575    | 1.060489e-10 | 0.222 |
| hsa-miR-1 BDNF     | 0.6026488    | 4.607104e-06 | 0.033 |
| hsa-miR-1 BLCAP    | 0.06366843   | 0.3802991    | 0.016 |
| hsa-miR-1 BRI3BP   | -0.3390895   | 1.500349e-06 | 0.068 |
| hsa-miR-1 BRWD2    | -0.1398474   | 0.05303368   | 0.001 |
| hsa-miR-1 CAND1    | -0.1855007   | 0.009995489  | 0.044 |
| hsa-miR-1 CAP1     | 0.5021872    | 0.0002363351 | 0.011 |
| hsa-miR-1 CDCP1    | -0.04620234  | 0.7525827    | 0.25  |
| hsa-miR-1 CDK9     | 0.1463627    | 0.04279144   | 0.115 |
| hsa-miR-1 CEBPA    | -0.2927599   | 3.776235e-05 | 0.007 |
| hsa-miR-1 CHST11   | -0.153504    | 0.1103169    | 0.174 |
| hsa-miR-1 CHSY1    | 0.4645657    | 1.138956e-11 | 0.118 |
| hsa-miR-1 CLCN3    | -0.1505475   | 0.03713111   | 0.073 |
| hsa-miR-1 CNN3     | -0.0638043   | 0.5261525    | 0.078 |
| hsa-miR-1 COIL     | -0.3439714   | 1.034438e-06 | 0.001 |
| hsa-miR-1 CORO1C   | 0.3958874    | 0.004866854  | 0.007 |
| hsa-miR-1 CPOX     | -0.1482212   | 0.04019412   | 0.114 |
| hsa-miR-1 CSRP1    | 0.2963168    | 3.003727e-05 | 0.145 |
| hsa-miR-1 CTSC     | 0.2545105    | 0.07760237   | 0.093 |
| hsa-miR-1 DDX5     | -0.1454804   | 0.318574     | 0.146 |
| hsa-miR-1 DHX15    | 0.08545204   | 0.3072278    | 0.195 |
| hsa-miR-1 DNAJB1   | 0.07259346   | 0.6201125    | 0.139 |
| hsa-miR-1 EGFR     | -0.01242735  | 0.8641604    | 0.032 |
| hsa-miR-1 EHMT1    | -0.1699164   | 0.01846219   | 0.058 |
| hsa-miR-1 EHMT2    | -0.3574644   | 3.580315e-07 | 0.013 |
| hsa-miR-1 EML4     | -0.3250272   | 4.228762e-06 | 0.001 |
| hsa-miR-1 EPB41L4B | 0.1645451    | 0.02256722   | 0.086 |
| hsa-miR-1 F2       | 0.1741686    | 0.0156883    | 0.39  |
| hsa-miR-1 FBLN2    | -0.3157049   | 0.02712344   | 0.02  |
| hsa-miR-1 FN1      | 0.3654889    | 0.009811622  | 0.034 |

Table S2.Results obtained for the test on experimentally validated targets

|                    |             |              |       |
|--------------------|-------------|--------------|-------|
| hsa-miR-1 FOXP1    | 0.2121226   | 0.01822052   | 0.004 |
| hsa-miR-1 G6PD     | -0.1940106  | 0.181632     | 0.183 |
| hsa-miR-1 GAK      | -0.2258217  | 0.1187188    | 0.132 |
| hsa-miR-1 GATA4    | -0.03377627 | 0.6418639    | 0.38  |
| hsa-miR-1 GCH1     | 0.3619825   | 2.481994e-07 | 0.351 |
| hsa-miR-1 GJA1     | 0.3623395   | 0.0105127    | 0.114 |
| hsa-miR-1 GNPDA2   | 0.2165039   | 0.1351262    | 0.211 |
| hsa-miR-1 GNPNAT1  | 0.1870438   | 0.009382365  | 0.257 |
| hsa-miR-1 GOLGA7   | 0.1381459   | 0.0560203    | 0.155 |
| hsa-miR-1 H3F3B    | -0.2958255  | 0.03904019   | 0.018 |
| hsa-miR-1 HAND2    | 0.4779138   | 2.384981e-12 | 0.636 |
| hsa-miR-1 HDAC4    | -0.3285245  | 0.0002534439 | 0.007 |
| hsa-miR-1 HIST1H3B | -0.06212926 | 0.5370922    | 0.006 |
| hsa-miR-1 HIST1H3I | 0.02523437  | 0.8022119    | 0.079 |
| hsa-miR-1 IGF1     | 0.1937766   | 0.00970258   | 0.042 |
| hsa-miR-1 IHPK2    | -0.1501209  | 0.03767751   | 0.082 |
| hsa-miR-1 IQGAP3   | -0.06868992 | 0.6390902    | 0.127 |
| hsa-miR-1 ITGB4    | -0.09066694 | 0.3672117    | 0.207 |
| hsa-miR-1 KCNJ2    | 0.1916577   | 0.1870895    | 0.034 |
| hsa-miR-1 KIAA1598 | -0.1137318  | 0.1162468    | 0.025 |
| hsa-miR-1 KIAA1618 | -0.2348701  | 0.001041031  | 0.126 |
| hsa-miR-1 LARP4    | 0.3569376   | 0.01181578   | 0.035 |
| hsa-miR-1 LASP1    | 0.4093163   | 1.571463e-06 | 0.024 |
| hsa-miR-1 LASS2    | 0.168957    | 0.02945875   | 0.038 |
| hsa-miR-1 LIN7C    | 0.2190358   | 0.002270325  | 0.294 |
| hsa-miR-1 LRP1     | 0.1308517   | 0.3701578    | 0.101 |
| hsa-miR-1 LRRRC8A  | -0.02899908 | 0.8432057    | 0.204 |
| hsa-miR-1 LZTFL1   | 0.0995818   | 0.3217867    | 0.004 |
| hsa-miR-1 MEF2A    | 0.1318589   | 0.06828394   | 0.474 |
| hsa-miR-1 MET      | -0.1402093  | 0.05241572   | 0.01  |
| hsa-miR-1 MMD      | -0.1582729  | 0.1376308    | 0.001 |
| hsa-miR-1 MOV10    | -0.4195145  | 1.388973e-09 | 0.001 |
| hsa-miR-1 MRC2     | 0.2463478   | 0.0005722368 | 0.033 |
| hsa-miR-1 MTHFD2   | 0.4518535   | 0.0002680659 | 0.133 |
| hsa-miR-1 MTX1     | -0.3248108  | 4.295039e-06 | 0.053 |
| hsa-miR-1 MXD4     | -0.2569913  | 0.0746561    | 0.073 |
| hsa-miR-1 NETO2    | -0.2306635  | 0.001614768  | 0.133 |
| hsa-miR-1 NOTCH2   | -0.03337374 | 0.6458404    | 0.143 |
| hsa-miR-1 NP       | 0.142479    | 0.04867528   | 0.062 |
| hsa-miR-1 NRP1     | 0.2635437   | 0.0002212465 | 0.156 |
| hsa-miR-1 OAT      | 0.338692    | 0.0172907    | 0.085 |
| hsa-miR-1 PDCD4    | 0.2208581   | 0.03058893   | 0.089 |
| hsa-miR-1 PDLIM7   | 0.3043177   | 0.03350821   | 0.094 |
| hsa-miR-1 PFTK1    | -0.1856446  | 0.009936855  | 0.127 |
| hsa-miR-1 PGM2     | 0.119987    | 0.09737261   | 0.026 |
| hsa-miR-1 PICALM   | 0.5322116   | 8.28873e-05  | 0.053 |
| hsa-miR-1 PIM1     | 0.2196723   | 0.002202491  | 0.031 |
| hsa-miR-1 PLEKHB2  | -0.2079522  | 0.1516251    | 0.004 |
| hsa-miR-1 PLEKHC1  | 0.1970002   | 0.006166731  | 0.073 |
| hsa-miR-1 POGK     | -0.2016364  | 0.005038286  | 0.104 |
| hsa-miR-1 POLA2    | 0.0529955   | 0.7176165    | 0.413 |
| hsa-miR-1 POLR2K   | -0.2876528  | 5.217877e-05 | 0.025 |
| hsa-miR-1 POM121   | -0.09190452 | 0.5299677    | 0.115 |

Table S2.Results obtained for the test on experimentally validated targets

|                       |             |              |       |
|-----------------------|-------------|--------------|-------|
| hsa-miR-1 PPIB        | -0.1829946  | 0.01106689   | 0.051 |
| hsa-miR-1 PREX1       | -0.343885   | 0.01554846   | 0.151 |
| hsa-miR-1 PTBP1       | -0.241233   | 0.0007497336 | 0.081 |
| hsa-miR-1 PTBP2       | -0.2613487  | 0.0002506922 | 0.009 |
| hsa-miR-1 PTMA        | -0.06028783 | 0.593985     | 0.162 |
| hsa-miR-1 PTPLAD1     | 0.09114402  | 0.3121887    | 0.078 |
| hsa-miR-1 PTPLB       | 0.5595577   | 2.917169e-05 | 0.007 |
| hsa-miR-1 PTPRF       | -0.423132   | 9.688395e-10 | 0.002 |
| hsa-miR-1 PWP1        | -0.3025813  | 1.992436e-05 | 0.063 |
| hsa-miR-1 RAB11FIP2   | 0.2034709   | 0.1608419    | 0.186 |
| hsa-miR-1 RABGAP1L    | 0.09151269  | 0.2068022    | 0.101 |
| hsa-miR-1 RFT1        | -0.2562811  | 0.0003331499 | 0.005 |
| hsa-miR-1 RHEB        | -0.2495968  | 0.0004805786 | 0.007 |
| hsa-miR-1 RNF138      | 0.05367044  | 0.4596906    | 0.238 |
| hsa-miR-1 SAC3D1      | -0.1714985  | 0.238696     | 0.042 |
| hsa-miR-1 SDC4        | 0.4368412   | 6.655093e-05 | 0.146 |
| hsa-miR-1 SERP1       | 0.4797235   | 0.0004869091 | 0.228 |
| hsa-miR-1 SFRS9       | -0.338762   | 1.53789e-06  | 0.001 |
| hsa-miR-1 SFXN1       | 0.1624973   | 0.02432772   | 0.116 |
| hsa-miR-1 SH2D4A      | 0.09021128  | 0.3696344    | 0.367 |
| hsa-miR-1 SH3BGRL3    | 0.1100678   | 0.1708943    | 0.03  |
| hsa-miR-1 SLC16A9     | -0.1608232  | 0.04560135   | 0.156 |
| hsa-miR-1 SLC25A1     | -0.2165463  | 0.01803146   | 0.002 |
| hsa-miR-1 SLC25A30    | -0.02914006 | 0.6882544    | 0.124 |
| hsa-miR-1 SNX6        | 0.2225554   | 0.1242887    | 0.044 |
| hsa-miR-1 SSNA1       | -0.01990105 | 0.8920391    | 0.324 |
| hsa-miR-1 SYNE1       | 0.209288    | 0.01185639   | 0.059 |
| hsa-miR-1 TAGLN2      | 0.2597428   | 0.07149245   | 0.093 |
| hsa-miR-1 TDP1        | 0.2592471   | 0.07205444   | 0.273 |
| hsa-miR-1 TH1L        | -0.3253208  | 4.140424e-06 | 0.001 |
| hsa-miR-1 THBS1       | 0.5161098   | 7.586909e-11 | 0.004 |
| hsa-miR-1 TIMP3       | 0.4631816   | 1.33431e-11  | 0.321 |
| hsa-miR-1 TMSB4X      | 0.2020266   | 0.163898     | 0.201 |
| hsa-miR-1 TPM1        | 0.4252216   | 0.002321364  | 0.027 |
| hsa-miR-1 TPM2        | 0.5526779   | 7.694049e-07 | 0.036 |
| hsa-miR-1 TPM3        | -0.224363   | 0.001756723  | 0.029 |
| hsa-miR-1 TPM4        | 0.2807124   | 8.018072e-05 | 0.157 |
| hsa-miR-1 TRAPPC3     | 0.349393    | 0.01386614   | 0.009 |
| hsa-miR-1 TRIM2       | -0.04422394 | 0.7628627    | 0.077 |
| hsa-miR-1 UHRF1       | -0.231543   | 0.01981836   | 0.068 |
| hsa-miR-1 UST         | 0.2639724   | 0.06683772   | 0.207 |
| hsa-miR-1 WDFY1       | 0.4161478   | 0.002939275  | 0.016 |
| hsa-miR-1 YWHAQ       | -0.296123   | 3.041644e-05 | 0.019 |
| hsa-miR-200a BAP1     | -0.4369672  | 2.347399e-10 | 0.003 |
| hsa-miR-200a CTNNB1   | 0.3028042   | 0.0101809    | 0.089 |
| hsa-miR-200a CTNNBIP1 | -0.0875912  | 0.2270099    | 0.007 |
| hsa-miR-200a DLX5     | -0.01982825 | 0.8924317    | 0.155 |
| hsa-miR-200a ELMO2    | -0.02533727 | 0.7272042    | 0.156 |
| hsa-miR-200a ERBB2IP  | -0.303993   | 0.002494101  | 0.003 |
| hsa-miR-200a G3BP2    | 0.348771    | 0.001729019  | 0.161 |
| hsa-miR-200a RAB30    | 0.1795727   | 0.01269268   | 0.584 |
| hsa-miR-200a ZEB1     | -0.2262021  | 0.1180826    | 0.025 |
| hsa-miR-200a ZEB2     | -0.4753922  | 1.221689e-11 | 0.021 |



Table S2.Results obtained for the test on experimentally validated targets

|                      |             |              |       |
|----------------------|-------------|--------------|-------|
| hsa-miR-200b BAP1    | -0.4782304  | 2.296251e-12 | 0.001 |
| hsa-miR-200b ELMO2   | -0.04651004 | 0.5217823    | 0.04  |
| hsa-miR-200b EP300   | -0.09892783 | 0.1721952    | 0.009 |
| hsa-miR-200b ERBB2IP | -0.3221592  | 0.000869146  | 0.001 |
| hsa-miR-200b ERRFI1  | 0.1596401   | 0.02698068   | 0.001 |
| hsa-miR-200b PTPN12  | 0.1054792   | 0.1453693    | 0.127 |
| hsa-miR-200b RERE    | 0.1416182   | 0.3317279    | 0.067 |
| hsa-miR-200b ZEB1    | -0.233829   | 0.1058665    | 0.041 |
| hsa-miR-200b ZEB2    | -0.4821091  | 2.607736e-11 | 0.018 |
| hsa-miR-200c BMI1    | -0.6689967  | 1.484469e-07 | 0.001 |
| hsa-miR-200c CDH1    | 0.9052645   | 4.867469e-09 | 0.022 |
| hsa-miR-200c ERBB2IP | -0.5299189  | 9.010697e-05 | 0.003 |
| hsa-miR-200c ERRFI1  | -0.04761796 | 0.7452528    | 0.186 |
| hsa-miR-200c KLHL20  | -0.1608318  | 0.2005951    | 0.122 |
| hsa-miR-200c PTPRD   | -0.02379924 | 0.8507361    | 0.136 |
| hsa-miR-200c TUBB3   | -0.1269799  | 0.3134696    | 0.204 |
| hsa-miR-200c ZEB1    | -0.3579593  | 0.01155921   | 0.048 |
| hsa-miR-200c ZEB2    | -0.518053   | 0.0001375208 | 0.012 |
| hsa-miR-200c ZFHX1B  | -0.03928278 | 0.6965191    | 0.057 |
| hsa-miR-203 SOCS3    | 0.3115206   | 1.09095e-05  | 0.274 |
| hsa-miR-204 ARPC1B   | -0.6957815  | 2.865266e-08 | 0.004 |
| hsa-miR-204 AURKB    | 0.1898666   | 0.1913219    | 0.128 |
| hsa-miR-204 BCL2     | -0.1293899  | 0.0736635    | 0.044 |
| hsa-miR-204 BMP1     | -0.4292749  | 0.002084713  | 0.066 |
| hsa-miR-204 CDC25B   | -0.3946376  | 1.477695e-08 | 0.001 |
| hsa-miR-204 CDH11    | -0.4130245  | 0.00318331   | 0.042 |
| hsa-miR-204 CTSC     | -0.564193   | 2.421451e-05 | 0.009 |
| hsa-miR-204 EFNB1    | 0.06138441  | 0.5419927    | 0.112 |
| hsa-miR-204 FBN2     | -0.1202326  | 0.410569     | 0.174 |
| hsa-miR-204 HMGA2    | -0.2288309  | 0.1137567    | 0.246 |
| hsa-miR-204 HOXA10   | -0.3250532  | 0.02267258   | 0.062 |
| hsa-miR-204 HOXB7    | -0.3403621  | 0.01671317   | 0.112 |
| hsa-miR-204 ITGB4    | -0.07368781 | 0.463966     | 0.168 |
| hsa-miR-204 MCL1     | -0.2341792  | 0.02122147   | 0.082 |
| hsa-miR-204 MEIS1    | 0.0827154   | 0.4108818    | 0.004 |
| hsa-miR-204 MEIS2    | 0.5676273   | 2.105525e-05 | 0.008 |
| hsa-miR-204 MMP3     | -0.2609561  | 0.07013168   | 0.125 |
| hsa-miR-204 MMP9     | 0.13919     | 0.3401691    | 0.106 |
| hsa-miR-204 SHC1     | -0.7519884  | 4.719252e-10 | 0.001 |
| hsa-miR-204 SNAI2    | -0.5486866  | 4.466804e-05 | 0.003 |
| hsa-miR-204 SOX4     | 0.7585761   | 2.715734e-10 | 0.007 |
| hsa-miR-204 SPARC    | -0.2646404  | 0.0002077731 | 0.011 |
| hsa-miR-204 TGFB2    | 0.1126658   | 0.1197301    | 0.243 |
| hsa-miR-205 DDX5     | -0.3224622  | 0.01443162   | 0.003 |
| hsa-miR-205 ERBB3    | 0.7563462   | 3.280687e-10 | 0.014 |
| hsa-miR-205 INPPL1   | -0.3448983  | 0.01522653   | 0.074 |
| hsa-miR-205 LRP1     | -0.2905397  | 0.04284755   | 0.149 |
| hsa-miR-205 MED1     | 0.561987    | 2.646808e-05 | 0.091 |
| hsa-miR-205 SIP1     | 0.00486114  | 0.9713717    | 0.134 |
| hsa-miR-205 VEGF     | 0.0318737   | 0.7516838    | 0.04  |
| hsa-miR-205 VEGFA    | 0.4337939   | 0.0007487833 | 0.149 |
| hsa-miR-205 ZEB1     | -0.32447    | 0.02293101   | 0.077 |
| hsa-miR-205 ZEB2     | -0.5421268  | 5.735634e-05 | 0.008 |

Table S2. Results obtained for the test on experimentally validated targets

|                      |              |              |       |
|----------------------|--------------|--------------|-------|
| hsa-miR-206 ESR1     | -0.2560538   | 0.05454041   | 0.132 |
| hsa-miR-206 FSTL1    | -0.1075823   | 0.4257128    | 0.199 |
| hsa-miR-206 GJA1     | 0.06142554   | 0.6498955    | 0.416 |
| hsa-miR-206 NOTCH3   | -0.3003711   | 0.02319468   | 0.048 |
| hsa-miR-206 UTRN     | -0.005269598 | 0.9689674    | 0.181 |
| hsa-miR-20a APP      | 0.4247232    | 0.002352048  | 0.185 |
| hsa-miR-20a BCL2     | 0.1914648    | 0.1265471    | 0.094 |
| hsa-miR-20a BMPR2    | -0.0261956   | 0.8359057    | 0.15  |
| hsa-miR-20a CCND1    | -0.8047805   | 3.209752e-12 | 0.001 |
| hsa-miR-20a CDKN1A   | -0.4864824   | 0.0003937801 | 0.062 |
| hsa-miR-20a HIF1A    | -0.1545565   | 0.2889837    | 0.127 |
| hsa-miR-20a IL8      | 0.1787051    | 0.1543581    | 0.093 |
| hsa-miR-20a JAK1     | -0.2226467   | 0.07464243   | 0.085 |
| hsa-miR-20a MEF2D    | -0.37748     | 0.007498267  | 0.01  |
| hsa-miR-20a PTEN     | 0.03050368   | 0.8093902    | 0.174 |
| hsa-miR-20a TGFB2    | -0.204408    | 0.1024039    | 0.083 |
| hsa-miR-20b CDKN1A   | -0.8066458   | 2.61869e-12  | 0.001 |
| hsa-miR-20b HIF1A    | -0.372737    | 0.008349502  | 0.082 |
| hsa-miR-20b HIPK3    | -0.0698035   | 0.580586     | 0.276 |
| hsa-miR-20b MYLIP    | 0.02269228   | 0.8576046    | 0.42  |
| hsa-miR-20b STAT3    | -0.3678682   | 0.009309058  | 0.077 |
| hsa-miR-210 ACVR1B   | 0.4543772    | 3.592415e-11 | 0.001 |
| hsa-miR-210 ATP11C   | 0.04683139   | 0.5189068    | 0.09  |
| hsa-miR-210 BDNF     | 0.1561419    | 0.2142124    | 0.101 |
| hsa-miR-210 CBX1     | 0.3208663    | 5.690327e-06 | 0.001 |
| hsa-miR-210 CDK10    | -0.06216177  | 0.3916975    | 0.023 |
| hsa-miR-210 CHD9     | 0.09300243   | 0.3784968    | 0.01  |
| hsa-miR-210 CLASP2   | 0.2290825    | 0.01743747   | 0.032 |
| hsa-miR-210 CPEB2    | 0.005564651  | 0.9389392    | 0.028 |
| hsa-miR-210 DDAH1    | 0.2250876    | 0.001695726  | 0.076 |
| hsa-miR-210 E2F3     | 0.3365777    | 1.812229e-06 | 0.004 |
| hsa-miR-210 EFNA3    | 0.2238969    | 0.07298463   | 0.122 |
| hsa-miR-210 ELK3     | -0.3787278   | 6.071684e-08 | 0.026 |
| hsa-miR-210 FAM116A  | 0.1454856    | 0.04406523   | 0.001 |
| hsa-miR-210 GPD1L    | 0.04980392   | 0.6935916    | 0.124 |
| hsa-miR-210 HECTD1   | -0.2370839   | 0.0009295891 | 0.034 |
| hsa-miR-210 HOXA1    | -0.05572147  | 0.6593094    | 0.303 |
| hsa-miR-210 HOXA3    | 0.05179412   | 0.4755531    | 0.017 |
| hsa-miR-210 HOXA9    | 0.1141944    | 0.3650583    | 0.067 |
| hsa-miR-210 ISCU     | -0.1881718   | 0.008955458  | 0.001 |
| hsa-miR-210 KIAA1161 | 0.08840526   | 0.2227042    | 0.187 |
| hsa-miR-210 MDGA1    | 0.02325458   | 0.7488439    | 0.121 |
| hsa-miR-210 MIB1     | 0.207912     | 0.003806205  | 0.019 |
| hsa-miR-210 MID1IP1  | 0.1869553    | 0.009416601  | 0.116 |
| hsa-miR-210 MNT      | 0.009570077  | 0.8951868    | 0.067 |
| hsa-miR-210 NCAM1    | -0.2335169   | 0.001115054  | 0.008 |
| hsa-miR-210 NIPBL    | -0.2272077   | 0.006737404  | 0.021 |
| hsa-miR-210 NPTX1    | -0.04304536  | 0.733505     | 0.135 |
| hsa-miR-210 P4HB     | 0.414028     | 2.379308e-09 | 0.054 |
| hsa-miR-210 PIM1     | -0.09432053  | 0.2938245    | 0.063 |
| hsa-miR-210 PTAR1    | 0.09855822   | 0.1738114    | 0.142 |
| hsa-miR-210 PTPN1    | 0.04354292   | 0.5487108    | 0.02  |
| hsa-miR-210 RAD52    | -0.01562517  | 0.829683     | 0.088 |

Table S2.Results obtained for the test on experimentally validated targets

|                     |             |              |       |
|---------------------|-------------|--------------|-------|
| hsa-miR-210 SEH1L   | 0.1018435   | 0.1598347    | 0.085 |
| hsa-miR-210 SERTAD2 | 0.207306    | 0.003912047  | 0.045 |
| hsa-miR-210 SMCHD1  | -0.4601079  | 0.0001151765 | 0.025 |
| hsa-miR-210 TNPO1   | 0.2235827   | 0.001824646  | 0.004 |
| hsa-miR-210 UBQLN1  | 0.1502034   | 0.0375713    | 0.038 |
| hsa-miR-210 XIST    | -0.05875784 | 0.5594468    | 0.053 |
| hsa-miR-214 EZH2    | -0.5143276  | 2.334448e-14 | 0.001 |
| hsa-miR-214 PTEN    | 0.363742    | 2.148661e-07 | 0.08  |
| hsa-miR-215 CDKN1A  | -0.02536348 | 0.7269332    | 0.025 |
| hsa-miR-215 DHFR    | 0.1745262   | 0.01547255   | 0.323 |
| hsa-miR-215 DTL     | -0.1612789  | 0.02543025   | 0.017 |
| hsa-miR-217 IRS1    | 0.06582976  | 0.3643052    | 0.209 |
| hsa-miR-217 NR4A2   | -0.08553076 | 0.2381702    | 0.092 |
| hsa-miR-217 PTEN    | -0.1558276  | 0.03090354   | 0.012 |
| hsa-miR-217 ROBO1   | -0.0974758  | 0.4255552    | 0.028 |
| hsa-miR-217 SIRT1   | -0.251029   | 0.08189079   | 0.278 |
| hsa-miR-218 COL1A1  | 0.4989299   | 1.767475e-13 | 0.022 |
| hsa-miR-218 EBP     | -0.2248502  | 0.01003739   | 0.025 |
| hsa-miR-218 EFNA1   | 0.2482575   | 0.01219976   | 0.058 |
| hsa-miR-218 LAMB3   | -0.3460493  | 0.01368899   | 0.056 |
| hsa-miR-218 LASP1   | 0.3701105   | 0.008855925  | 0.193 |
| hsa-miR-218 MAFG    | -0.01213756 | 0.9340324    | 0.363 |
| hsa-miR-218 MBNL2   | 0.357065    | 3.697181e-07 | 0.001 |
| hsa-miR-218 MRPS27  | -0.3031663  | 0.0003875869 | 0.079 |
| hsa-miR-218 NFE2L1  | -0.1897292  | 0.008394367  | 0.041 |
| hsa-miR-218 NUP93   | -0.1926007  | 0.007441062  | 0.079 |
| hsa-miR-218 SP1     | -0.3542801  | 0.01250612   | 0.084 |
| hsa-miR-219 CAMK2G  | 0.4222622   | 0.002508883  | 0.295 |
| hsa-miR-21 ACTA2    | 0.1368721   | 0.05834583   | 0.069 |
| hsa-miR-21 APAF1    | 0.2871315   | 0.04545975   | 0.886 |
| hsa-miR-21 BASP1    | 0.2804058   | 0.02367046   | 0.009 |
| hsa-miR-21 BCL2     | 0.1540598   | 0.2204621    | 0.188 |
| hsa-miR-21 BMPR2    | -0.1891674  | 0.04191554   | 0.036 |
| hsa-miR-21 BTG2     | 0.1345358   | 0.3567173    | 0.157 |
| hsa-miR-21 CDC25A   | 0.1728786   | 0.1684685    | 0.376 |
| hsa-miR-21 CDK6     | 0.07925694  | 0.274497     | 0.063 |
| hsa-miR-21 CDKN1A   | -0.140864   | 0.3343355    | 0.122 |
| hsa-miR-21 CFL2     | -0.4004545  | 8.648986e-09 | 0.001 |
| hsa-miR-21 DAXX     | 0.3308238   | 2.77592e-06  | 0.09  |
| hsa-miR-21 DERL1    | 0.1372157   | 0.05771081   | 0.029 |
| hsa-miR-21 E2F2     | -0.08043069 | 0.5827503    | 0.309 |
| hsa-miR-21 FAM3C    | -0.156738   | 0.02992512   | 0.118 |
| hsa-miR-21 FAS      | -0.3988874  | 0.0009972922 | 0.004 |
| hsa-miR-21 FMOD     | 0.1557831   | 0.1576351    | 0.01  |
| hsa-miR-21 GLCC1    | 0.03775951  | 0.6030775    | 0.044 |
| hsa-miR-21 HIPK3    | -0.3401621  | 0.005563445  | 0.075 |
| hsa-miR-21 HNRNPK   | 0.1817436   | 0.2113719    | 0.531 |
| hsa-miR-21 HNRPK    | -0.1552335  | 0.03155657   | 0.05  |
| hsa-miR-21 IL6R     | -0.04389285 | 0.5454999    | 0.039 |
| hsa-miR-21 JAG1     | 0.3342452   | 2.156433e-06 | 0.046 |
| hsa-miR-21 LRRFIP1  | -0.2726171  | 0.0001304844 | 0.028 |
| hsa-miR-21 MARCKS   | 0.2856323   | 5.919934e-05 | 0.078 |
| hsa-miR-21 MTAP     | -0.1412032  | 0.2618793    | 0.273 |

Table S2. Results obtained for the test on experimentally validated targets

|                     |            |              |       |
|---------------------|------------|--------------|-------|
| hsa-miR-21 MYC      | -0.1863468 | 0.1372056    | 0.043 |
| hsa-miR-21 NCAPG    | 0.3766006  | 7.293208e-08 | 0.119 |
| hsa-miR-21 NFIB     | -0.1998023 | 0.05854097   | 0.03  |
| hsa-miR-21 PDCD4    | 0.1837764  | 0.2062217    | 0.036 |
| hsa-miR-21 PLOD3    | 0.3177079  | 7.107684e-06 | 0.013 |
| hsa-miR-21 PIIF     | -0.2861295 | 5.73938e-05  | 0.003 |
| hsa-miR-21 PTEN     | -0.2338963 | 0.001093825  | 0.027 |
| hsa-miR-21 RASA1    | 0.02848026 | 0.8459766    | 0.285 |
| hsa-miR-21 RASGRP1  | -0.3156621 | 0.01042446   | 0.158 |
| hsa-miR-21 RECK     | -0.1484446 | 0.039891     | 0.134 |
| hsa-miR-21 REST     | -0.2323615 | 0.02179049   | 0.056 |
| hsa-miR-21 RHOB     | -0.2792877 | 8.745146e-05 | 0.002 |
| hsa-miR-21 RPS7     | 0.3207146  | 5.751791e-06 | 0.089 |
| hsa-miR-21 RTN4     | -0.1773472 | 0.01385939   | 0.006 |
| hsa-miR-21 SESN1    | 0.1944074  | 0.1207108    | 0.104 |
| hsa-miR-21 SGK3     | 0.2587325  | 0.07264158   | 0.063 |
| hsa-miR-21 SLC16A10 | -0.2024913 | 0.004851685  | 0.001 |
| hsa-miR-21 SOCS5    | 0.04875366 | 0.699743     | 0.252 |
| hsa-miR-21 SPRY1    | -0.1318743 | 0.2135632    | 0.051 |
| hsa-miR-21 SPRY2    | -0.338703  | 1.544753e-06 | 0.007 |
| hsa-miR-21 TGFB1    | 0.1625088  | 0.1958788    | 0.357 |
| hsa-miR-21 TGFB1    | 0.1984184  | 0.1130892    | 0.254 |
| hsa-miR-21 TGFB2    | -0.1648252 | 0.02233516   | 0.008 |
| hsa-miR-21 TGFB3    | -0.304839  | 1.714445e-05 | 0.001 |
| hsa-miR-21 TIMP3    | -0.2639213 | 0.06689251   | 0.14  |
| hsa-miR-21 TM9SF3   | 0.2604504  | 0.07069635   | 0.192 |
| hsa-miR-21 TOPORS   | -0.3280966 | 3.387516e-06 | 0.001 |
| hsa-miR-21 TP53BP2  | 0.2316541  | 0.001224868  | 0.199 |
| hsa-miR-21 TPM1     | 0.286699   | 5.538911e-05 | 0.028 |
| hsa-miR-21 WFS1     | 0.2186082  | 0.002316951  | 0.067 |
| hsa-miR-21 WIBG     | -0.0911089 | 0.4169376    | 0.029 |
| hsa-miR-221 ARIH2   | -0.477028  | 2.6355e-06   | 0.001 |
| hsa-miR-221 BNIP3L  | 0.3310785  | 4.544524e-06 | 0.001 |
| hsa-miR-221 BRAP    | 0.2356066  | 0.05884413   | 0.302 |
| hsa-miR-221 CDKN1B  | -0.3271335 | 9.300527e-05 | 0.056 |
| hsa-miR-221 CDKN1C  | 0.6062254  | 5.805859e-07 | 0.176 |
| hsa-miR-221 CREBZF  | 0.246544   | 0.0005662748 | 0.018 |
| hsa-miR-221 DDIT4   | -0.3254409 | 0.02250214   | 0.117 |
| hsa-miR-221 DKK2    | -0.1155748 | 0.3592521    | 0.13  |
| hsa-miR-221 FOS     | -0.3792853 | 5.785622e-08 | 0.001 |
| hsa-miR-221 FOXO3   | 0.3281346  | 3.378181e-06 | 0.105 |
| hsa-miR-221 HMG2L1  | 0.4136693  | 2.463694e-09 | 0.003 |
| hsa-miR-221 HOXB5   | -0.3368548 | 0.006073228  | 0.023 |
| hsa-miR-221 ICAM1   | -0.1662119 | 0.02121639   | 0.023 |
| hsa-miR-221 KIT     | -0.3499982 | 0.01369114   | 0.094 |
| hsa-miR-221 MYBL1   | 0.2315446  | 0.001231623  | 0.151 |
| hsa-miR-221 TBK1    | 0.4400895  | 0.001554642  | 0.099 |
| hsa-miR-221 USP18   | -0.1361094 | 0.1227691    | 0.308 |
| hsa-miR-222 CDKN1B  | -0.2758957 | 0.0001073239 | 0.039 |
| hsa-miR-222 CDKN1C  | 0.5946838  | 1.0725e-06   | 0.238 |
| hsa-miR-222 FOS     | -0.4083731 | 4.102206e-09 | 0.001 |
| hsa-miR-222 FOXO3   | 0.3051513  | 1.679014e-05 | 0.072 |
| hsa-miR-222 KIT     | 0.03002086 | 0.8123519    | 0.189 |

Table S2. Results obtained for the test on experimentally validated targets

|                     |             |              |       |
|---------------------|-------------|--------------|-------|
| hsa-miR-222 PPP2R2A | -0.4260093  | 7.252525e-10 | 0.001 |
| hsa-miR-222 SOD2    | 0.08195289  | 0.5064705    | 0.113 |
| hsa-miR-222 STAT5A  | 0.2857615   | 0.03117682   | 0.258 |
| hsa-miR-223 E2F1    | 0.1266372   | 0.2069725    | 0.27  |
| hsa-miR-223 IRS1    | -0.3365583  | 1.814863e-06 | 0.009 |
| hsa-miR-223 LMO2    | 0.2881788   | 5.0484e-05   | 0.06  |
| hsa-miR-223 MEF2C   | 0.1842486   | 0.01051877   | 0.026 |
| hsa-miR-223 NFIA    | -0.04541626 | 0.6520045    | 0.001 |
| hsa-miR-223 RHOB    | 0.2539878   | 0.0003781945 | 0.037 |
| hsa-miR-223 STMN1   | 0.1434296   | 0.152454     | 0.266 |
| hsa-miR-224 AP2M1   | 0.5816416   | 1.170653e-05 | 0.195 |
| hsa-miR-224 API5    | -0.5464392  | 4.869162e-05 | 0.018 |
| hsa-miR-224 ATF2    | 0.298084    | 0.0009052375 | 0.001 |
| hsa-miR-224 CD40    | 0.1674433   | 0.04758399   | 0.15  |
| hsa-miR-224 CDC42   | 0.3085788   | 0.01238682   | 0.012 |
| hsa-miR-224 CXCR4   | -0.522938   | 0.0001157716 | 0.015 |
| hsa-miR-224 FOSB    | -0.2446156  | 0.004411841  | 0.005 |
| hsa-miR-224 JAG1    | -0.2354819  | 0.05898208   | 0.039 |
| hsa-miR-224 KLK10   | 0.03189528  | 0.7515211    | 0.161 |
| hsa-miR-224 NCOA6   | -0.2524354  | 0.003188189  | 0.004 |
| hsa-miR-224 NIT1    | -0.08822947 | 0.5139917    | 0.006 |
| hsa-miR-224 PDGFRB  | 0.6218863   | 1.846601e-06 | 0.052 |
| hsa-miR-22 BMP7     | 0.09040808  | 0.4738561    | 0.085 |
| hsa-miR-22 PTEN     | 0.07367746  | 0.5597084    | 0.066 |
| hsa-miR-23a CXCL12  | 0.1733062   | 0.1674018    | 0.019 |
| hsa-miR-23a HES1    | -0.4021107  | 0.000898996  | 0.008 |
| hsa-miR-23a POU4F2  | -0.1093483  | 0.3858911    | 0.344 |
| hsa-miR-23a RING1   | 0.4406884   | 0.001529155  | 0.422 |
| hsa-miR-23b MET     | 0.2683599   | 0.03066268   | 0.158 |
| hsa-miR-23b NOTCH1  | 0.1730998   | 0.2342736    | 0.066 |
| hsa-miR-23b RB1     | 0.5665941   | 2.196332e-05 | 0.409 |
| hsa-miR-24 AURKB    | -0.5457465  | 4.99971e-05  | 0.027 |
| hsa-miR-24 BRCA1    | 0.01412869  | 0.9110577    | 0.033 |
| hsa-miR-24 CCNA2    | -0.5293296  | 9.20532e-05  | 0.032 |
| hsa-miR-24 CDK4     | -0.3929704  | 0.005220292  | 0.007 |
| hsa-miR-24 DHFR     | -0.5051218  | 0.0002142383 | 0.026 |
| hsa-miR-24 E2F2     | -0.2708819  | 0.05975613   | 0.075 |
| hsa-miR-24 FEN1     | -0.5236741  | 0.0001127812 | 0.023 |
| hsa-miR-24 MAPK14   | -0.385981   | 0.001495639  | 0.067 |
| hsa-miR-24 MYC      | -0.3382969  | 0.005846101  | 0.031 |
| hsa-miR-24 NOTCH1   | -0.2256538  | 0.07070485   | 0.028 |
| hsa-miR-24 TRIB3    | 0.2357767   | 0.1029082    | 0.174 |
| hsa-miR-25 BCL2L11  | 0.2074431   | 0.003887868  | 0.059 |
| hsa-miR-25 KLF4     | -0.3969388  | 1.196998e-08 | 0.001 |
| hsa-miR-25 PCAF     | -0.3108972  | 1.138475e-05 | 0.002 |
| hsa-miR-26a CCND2   | 0.4771781   | 0.0005268406 | 0.001 |
| hsa-miR-26a CCNE2   | -0.1035227  | 0.4118513    | 0.041 |
| hsa-miR-26a CDC6    | -0.2295165  | 0.06589276   | 0.119 |
| hsa-miR-26a EZH2    | 0.294313    | 0.01732411   | 0.33  |
| hsa-miR-26a HMGA1   | -0.4644113  | 0.0007752352 | 0.067 |
| hsa-miR-26a HMGA2   | -0.4378026  | 0.001655467  | 0.025 |
| hsa-miR-26a LIF     | -0.4705751  | 0.0006445455 | 0.071 |
| hsa-miR-26a PLAG1   | 0.04811524  | 0.7034918    | 0.094 |

Table S2. Results obtained for the test on experimentally validated targets

|                       |             |              |       |
|-----------------------|-------------|--------------|-------|
| hsa-miR-26a PTEN      | -0.4299159  | 0.0003513986 | 0.05  |
| hsa-miR-26a RB1       | 0.4918679   | 0.0003314499 | 0.415 |
| hsa-miR-26a SERBP1    | -0.438876   | 0.001607441  | 0.02  |
| hsa-miR-26a SMAD1     | 0.6046653   | 4.19784e-06  | 0.148 |
| hsa-miR-26a TGFB2     | -0.1384868  | 0.2712607    | 0.028 |
| hsa-miR-26b SERBP1    | -0.2202225  | 0.07794238   | 0.016 |
| hsa-miR-27a FOXO1     | -0.04257679 | 0.7714526    | 0.2   |
| hsa-miR-27a GCA       | -0.3188393  | 0.0255562    | 0.162 |
| hsa-miR-27a MYT1      | 0.2688642   | 0.03033858   | 0.139 |
| hsa-miR-27a PHB       | -0.1827471  | 0.2088183    | 0.293 |
| hsa-miR-27a RUNX1     | 0.4646662   | 0.0007693913 | 0.005 |
| hsa-miR-27a SP1       | -0.3097087  | 0.03034556   | 0.042 |
| hsa-miR-27a SP3       | 0.004030917 | 0.9780704    | 0.319 |
| hsa-miR-27a ZBTB10    | 0.1149183   | 0.3620062    | 0.021 |
| hsa-miR-27b CYP1B1    | -0.0411866  | 0.7787236    | 0.177 |
| hsa-miR-27b NOTCH1    | -0.2901897  | 0.01903265   | 0.042 |
| hsa-miR-27b PPARG     | -0.2047431  | 0.1581848    | 0.06  |
| hsa-miR-296 HGS       | -0.08402946 | 0.5659419    | 0.172 |
| hsa-miR-299-5p CDKN1A | 0.2843713   | 0.0003330722 | 0.025 |
| hsa-miR-29a BACE1     | 0.005688144 | 0.9690583    | 0.033 |
| hsa-miR-29a BCL2      | 0.2163019   | 0.08352374   | 0.143 |
| hsa-miR-29a CDC42     | 0.3204151   | 0.02479735   | 0.091 |
| hsa-miR-29a COL3A1    | -0.1607375  | 0.2008626    | 0.084 |
| hsa-miR-29a COL4A1    | -0.1837902  | 0.1427765    | 0.088 |
| hsa-miR-29a COL4A2    | -0.1606311  | 0.2011647    | 0.125 |
| hsa-miR-29a DKK1      | 0.5957952   | 6.290765e-06 | 0.077 |
| hsa-miR-29a DNMT3B    | -0.4204661  | 0.002629116  | 0.147 |
| hsa-miR-29a MCL1      | -0.4345014  | 0.0002986047 | 0.009 |
| hsa-miR-29a PIK3R1    | 0.1554438   | 0.2162938    | 0.013 |
| hsa-miR-29a RAN       | -0.2627641  | 0.0681421    | 0.259 |
| hsa-miR-29a SFRP2     | -0.4564873  | 0.0009779933 | 0.252 |
| hsa-miR-29a SPARC     | 0.1707133   | 0.2408854    | 0.092 |
| hsa-miR-29b ACVR2A    | -0.1977239  | 0.005976908  | 0.051 |
| hsa-miR-29b BACE1     | -0.3227347  | 0.0003600074 | 0.022 |
| hsa-miR-29b BCL2      | 0.1181263   | 0.1027139    | 0.036 |
| hsa-miR-29b CDC42     | 0.3521618   | 0.01308091   | 0.037 |
| hsa-miR-29b CDK6      | 0.04144637  | 0.56814      | 0.106 |
| hsa-miR-29b COL1A1    | 0.328664    | 0.02112631   | 0.06  |
| hsa-miR-29b COL3A1    | -0.1587659  | 0.2758893    | 0.092 |
| hsa-miR-29b COL4A2    | -0.2916658  | 0.04201195   | 0.119 |
| hsa-miR-29b COL5A3    | -0.5485122  | 4.49689e-05  | 0.015 |
| hsa-miR-29b CTNBP1    | -0.2875649  | 0.04512049   | 0.037 |
| hsa-miR-29b DNAJB11   | 0.4028661   | 0.004105006  | 0.315 |
| hsa-miR-29b DNMT1     | -0.1220345  | 0.09175237   | 0.022 |
| hsa-miR-29b DNMT3A    | -0.194369   | 0.006903106  | 0.03  |
| hsa-miR-29b DNMT3B    | -0.26065    | 0.03598912   | 0.1   |
| hsa-miR-29b HDAC4     | -0.290535   | 0.04285107   | 0.087 |
| hsa-miR-29b MCL1      | -0.3099762  | 0.01197618   | 0.001 |
| hsa-miR-29b PIK3R1    | 0.2330692   | 0.002147469  | 0.035 |
| hsa-miR-29b SFPQ      | 0.2230813   | 0.1233789    | 0.152 |
| hsa-miR-29b SP1       | -0.249811   | 0.0834342    | 0.055 |
| hsa-miR-29b TGFB3     | -0.5495958  | 4.312872e-05 | 0.054 |
| hsa-miR-29c BCL2      | 0.2114353   | 0.03379514   | 0.146 |

Table S2.Results obtained for the test on experimentally validated targets

|                     |             |              |       |
|---------------------|-------------|--------------|-------|
| hsa-miR-29c CDC42   | 0.4322345   | 0.001925694  | 0.011 |
| hsa-miR-29c COL15A1 | -0.4295183  | 0.002071208  | 0.038 |
| hsa-miR-29c COL1A1  | -0.152656   | 0.2247469    | 0.066 |
| hsa-miR-29c COL1A2  | -0.1927993  | 0.1781917    | 0.088 |
| hsa-miR-29c COL3A1  | -0.3701212  | 0.008853811  | 0.022 |
| hsa-miR-29c COL4A1  | -0.3728387  | 0.008330404  | 0.03  |
| hsa-miR-29c COL4A2  | -0.3532737  | 0.01277645   | 0.01  |
| hsa-miR-29c DNMT3B  | -0.3528007  | 0.01290521   | 0.043 |
| hsa-miR-29c FBN1    | -0.1853234  | 0.1394157    | 0.077 |
| hsa-miR-29c LAMC1   | -0.2767546  | 0.02563082   | 0.027 |
| hsa-miR-29c MCL1    | -0.3619706  | 0.003048026  | 0.014 |
| hsa-miR-29c PIK3R1  | 0.2008376   | 0.1664455    | 0.084 |
| hsa-miR-29c SPARC   | 0.2375257   | 0.1003062    | 0.086 |
| hsa-miR-29c TDG     | -0.1720822  | 0.2370772    | 0.075 |
| hsa-miR-302a CCND1  | -0.2672673  | 0.0374732    | 0.018 |
| hsa-miR-302a CDK4   | 0.1658783   | 0.2546676    | 0.072 |
| hsa-miR-302a LEFTY1 | 0.8063267   | 2.712053e-12 | 0.012 |
| hsa-miR-302a LEFTY2 | 0.7759577   | 5.787415e-11 | 0.005 |
| hsa-miR-302b CCND2  | -0.1746214  | 0.01541552   | 0.015 |
| hsa-miR-302d KLF13  | -0.5574549  | 3.17145e-05  | 0.002 |
| hsa-miR-302d MBNL2  | -0.3941983  | 0.0003725192 | 0.001 |
| hsa-miR-302d NR4A2  | -0.09801668 | 0.1761996    | 0.313 |
| hsa-miR-30a* CYR61  | -0.03725584 | 0.7114685    | 0.258 |
| hsa-miR-30a KRT7    | 0.05347925  | 0.5953146    | 0.332 |
| hsa-miR-30a* THBS1  | 0.01154148  | 0.9088015    | 0.333 |
| hsa-miR-30d GNAI2   | 0.1967845   | 0.1753457    | 0.281 |
| hsa-miR-31 LATS2    | -0.09658818 | 0.1826159    | 0.199 |
| hsa-miR-31 PPP2R2A  | 0.3324205   | 0.01961299   | 0.11  |
| hsa-miR-31 RHOA     | 0.3114412   | 0.0004426419 | 0.067 |
| hsa-miR-320 BCL2    | 0.4230684   | 0.0004462083 | 0.011 |
| hsa-miR-320 MCL1    | -0.3117714  | 0.01146599   | 0.026 |
| hsa-miR-324-5p SMO  | 0.2892536   | 4.718068e-05 | 0.006 |
| hsa-miR-326 NOTCH1  | -0.3264654  | 0.02205686   | 0.032 |
| hsa-miR-326 NOTCH2  | 0.02594718  | 0.7209068    | 0.04  |
| hsa-miR-326 SMO     | -0.1135905  | 0.1167037    | 0.083 |
| hsa-miR-328 ABCG2   | 0.1483411   | 0.04003122   | 0.733 |
| hsa-miR-328 BACE1   | 0.7317312   | 2.330946e-09 | 0.355 |
| hsa-miR-328 CD44    | 0.335545    | 0.01842503   | 0.096 |
| hsa-miR-335 ARPC5L  | -0.1421769  | 0.3298044    | 0.072 |
| hsa-miR-335 MERTK   | 0.1756426   | 0.01481549   | 0.061 |
| hsa-miR-335 PTPRN2  | 0.4117967   | 0.003284025  | 0.16  |
| hsa-miR-335 RASA1   | -0.1440771  | 0.3233145    | 0.017 |
| hsa-miR-335 RB1     | 0.4165065   | 0.002912338  | 0.009 |
| hsa-miR-335 SOX4    | 0.4754582   | 0.000555468  | 0.05  |
| hsa-miR-33b BCL2    | 0.1669995   | 0.09508217   | 0.175 |
| hsa-miR-345 CDKN1A  | -0.09253317 | 0.2017629    | 0.038 |
| hsa-miR-346 EFEMP2  | -0.1454556  | 0.3186574    | 0.093 |
| hsa-miR-346 IL18    | -0.05377889 | 0.7136192    | 0.237 |
| hsa-miR-346 LIF     | -0.1105039  | 0.4497224    | 0.43  |
| hsa-miR-34a BCL2    | -0.09934163 | 0.170399     | 0.012 |
| hsa-miR-34a BIRC3   | 0.2389185   | 0.0008456621 | 0.091 |
| hsa-miR-34a CCND1   | 0.6945342   | 3.105519e-08 | 0.109 |
| hsa-miR-34a CCND3   | 0.6483929   | 4.715584e-07 | 0.135 |

Table S2.Results obtained for the test on experimentally validated targets

|                     |             |              |       |
|---------------------|-------------|--------------|-------|
| hsa-miR-34a CCNE2   | -0.1856168  | 0.1387795    | 0.173 |
| hsa-miR-34a CDC25A  | -0.02475439 | 0.8448185    | 0.131 |
| hsa-miR-34a CDC25C  | -0.1624155  | 0.1961389    | 0.188 |
| hsa-miR-34a CDK4    | -0.6022348  | 4.695562e-06 | 0.001 |
| hsa-miR-34a CDK6    | 0.3167885   | 7.579533e-06 | 0.021 |
| hsa-miR-34a DLL1    | -0.3648483  | 0.009950864  | 0.061 |
| hsa-miR-34a E2F3    | -0.7614087  | 2.129842e-10 | 0.012 |
| hsa-miR-34a E2F5    | -0.6993629  | 2.268693e-08 | 0.001 |
| hsa-miR-34a HMGA2   | -0.1651462  | 0.1886227    | 0.088 |
| hsa-miR-34a HNF4A   | -0.02267606 | 0.7548908    | 0.016 |
| hsa-miR-34a JAG1    | -0.1805851  | 0.1499978    | 0.163 |
| hsa-miR-34a MET     | 0.07408595  | 0.3071285    | 0.065 |
| hsa-miR-34a MYC     | 0.4455287   | 0.001336474  | 0.065 |
| hsa-miR-34a MYCN    | -0.6220314  | 1.833482e-06 | 0.002 |
| hsa-miR-34a NOTCH1  | -0.5051819  | 0.0002138054 | 0.037 |
| hsa-miR-34a NOTCH2  | -0.1589942  | 0.2058551    | 0.054 |
| hsa-miR-34a SIRT1   | -0.4439793  | 0.001395651  | 0.01  |
| hsa-miR-34a VAMP2   | -0.1315116  | 0.06902067   | 0.002 |
| hsa-miR-34b BCL2    | -0.2735451  | 0.0001234946 | 0.015 |
| hsa-miR-34b HMGA2   | 0.1862702   | 0.200025     | 0.048 |
| hsa-miR-34b MYC     | -0.2695259  | 0.0001565296 | 0.004 |
| hsa-miR-34b NOTCH1  | -0.3490926  | 0.01395371   | 0.129 |
| hsa-miR-34b NOTCH2  | 0.08845895  | 0.2224222    | 0.152 |
| hsa-miR-34c BCL2    | 0.1549267   | 0.03189845   | 0.271 |
| hsa-miR-34c E2F3    | 0.4772287   | 2.588596e-12 | 0.094 |
| hsa-miR-34c HMGA2   | 0.2622848   | 0.0686651    | 0.086 |
| hsa-miR-34c MET     | -0.08193922 | 0.2585309    | 0.114 |
| hsa-miR-34c MYC     | 0.2700193   | 0.06060578   | 0.011 |
| hsa-miR-34c NOTCH1  | -0.2765163  | 0.0544384    | 0.13  |
| hsa-miR-34c NOTCH2  | 0.08995691  | 0.2146584    | 0.194 |
| hsa-miR-34c NOTCH3  | 0.468383    | 7.333467e-12 | 0.018 |
| hsa-miR-363 CDKN1A  | -0.764649   | 1.606299e-10 | 0.012 |
| hsa-miR-370 HMGA2   | -0.2912589  | 0.04231234   | 0.059 |
| hsa-miR-370 MAP3K8  | -0.0714455  | 0.5716936    | 0.414 |
| hsa-miR-372 CDKN1A  | -0.5670822  | 2.152992e-05 | 0.027 |
| hsa-miR-372 KLF13   | -0.3697105  | 0.008935324  | 0.061 |
| hsa-miR-372 MBNL2   | -0.2620029  | 0.06897421   | 0.14  |
| hsa-miR-372 RECK    | -0.04784716 | 0.7440681    | 0.346 |
| hsa-miR-372 WEE1    | 0.6088781   | 3.449189e-06 | 0.133 |
| hsa-miR-373 ADAM9   | -0.5565265  | 3.290064e-05 | 0.01  |
| hsa-miR-373 ARHGEF3 | -0.3263938  | 0.02208773   | 0.012 |
| hsa-miR-373 BAZ1A   | -0.4526891  | 0.001091067  | 0.017 |
| hsa-miR-373 CD44    | -0.5710039  | 1.832321e-05 | 0.008 |
| hsa-miR-373 CD83    | 0.3208197   | 0.01496726   | 0.015 |
| hsa-miR-373 CENPF   | 0.3378385   | 0.01759232   | 0.061 |
| hsa-miR-373 CFL2    | -0.5099098  | 0.0001821826 | 0.023 |
| hsa-miR-373 FYCO1   | -0.5563075  | 3.318633e-05 | 0.007 |
| hsa-miR-373 GBAS    | -0.4986044  | 0.0002661066 | 0.013 |
| hsa-miR-373 GBP3    | -0.351264   | 0.01333124   | 0.025 |
| hsa-miR-373 GLTP    | -0.2783792  | 0.05276674   | 0.038 |
| hsa-miR-373 GPSM2   | -0.3034564  | 0.03403792   | 0.136 |
| hsa-miR-373 HERPUD1 | -0.4519879  | 0.001113178  | 0.024 |
| hsa-miR-373 HSPA14  | 0.8493778   | 1.221245e-14 | 0.008 |



Table S2.Results obtained for the test on experimentally validated targets

|                       |             |              |       |
|-----------------------|-------------|--------------|-------|
| hsa-miR-373 INSIG2    | -0.5537462  | 3.670108e-05 | 0.011 |
| hsa-miR-373 KIF23     | 0.7082419   | 1.252947e-08 | 0.019 |
| hsa-miR-373 KLHL12    | 0.08329419  | 0.5693577    | 0.142 |
| hsa-miR-373 LMNB1     | 0.4093287   | 0.00349501   | 0.022 |
| hsa-miR-373 LUC7L2    | -0.2213286  | 0.0980129    | 0.03  |
| hsa-miR-373 MICA      | -0.3163603  | 0.02678923   | 0.025 |
| hsa-miR-373 MKRN1     | 0.1716636   | 0.206964     | 0.058 |
| hsa-miR-373 NIN       | -0.6365416  | 8.821398e-07 | 0.018 |
| hsa-miR-373 NUPL1     | 0.2845671   | 0.03192011   | 0.016 |
| hsa-miR-373 PHC2      | -0.5923192  | 7.347342e-06 | 0.003 |
| hsa-miR-373 PRC1      | -0.1085937  | 0.4576436    | 0.135 |
| hsa-miR-373 RAD23B    | 0.1914115   | 0.1537716    | 0.053 |
| hsa-miR-373 RECK      | 0.3878623   | 0.0028724    | 0.101 |
| hsa-miR-373 RELA      | -0.6696358  | 1.430124e-07 | 0.002 |
| hsa-miR-373 RNF149    | -0.296434   | 0.03862031   | 0.103 |
| hsa-miR-373 RPIA      | -0.2486734  | 0.06214394   | 0.092 |
| hsa-miR-373 STK4      | -0.2805841  | 0.05084202   | 0.13  |
| hsa-miR-373 TMEM14A   | -0.3758691  | 0.007778522  | 0.024 |
| hsa-miR-373 TNFAIP1   | -0.6586611  | 2.680286e-07 | 0.03  |
| hsa-miR-373 TTC8      | -0.5520491  | 3.921491e-05 | 0.015 |
| hsa-miR-373 TUSC2     | -0.1112197  | 0.4101399    | 0.023 |
| hsa-miR-373 USP12     | 0.1177748   | 0.3829232    | 0.074 |
| hsa-miR-373 ZHX1      | -0.735595   | 1.738153e-09 | 0.004 |
| hsa-miR-373 ZNF226    | -0.5066572  | 0.0002034403 | 0.005 |
| hsa-miR-375 ADIPOR2   | 0.1492445   | 0.03882152   | 0.005 |
| hsa-miR-375 AHR       | 0.3526464   | 0.008492691  | 0.001 |
| hsa-miR-375 C1QBP     | 0.7467787   | 7.218683e-10 | 0.046 |
| hsa-miR-375 INSM1     | -0.1471285  | 0.313063     | 0.237 |
| hsa-miR-375 MTPN      | -0.2735746  | 0.0001232778 | 0.042 |
| hsa-miR-375 MXI1      | -0.3574628  | 0.0002895206 | 0.175 |
| hsa-miR-375 PDK1      | -0.3767964  | 7.171526e-08 | 0.016 |
| hsa-miR-375 TIMM8A    | -0.2276922  | 0.00149208   | 0.024 |
| hsa-miR-375 USP1      | -0.4230425  | 9.775618e-10 | 0.006 |
| hsa-miR-375 YWHAZ     | 0.3467654   | 0.006128643  | 0.011 |
| hsa-miR-376a* PRPS1   | 0.2194553   | 0.07901059   | 0.249 |
| hsa-miR-376a* SLC16A1 | -0.06988816 | 0.580126     | 0.194 |
| hsa-miR-376a* SNX19   | 0.1235271   | 0.3977687    | 0.286 |
| hsa-miR-376a* TTK     | -0.2733567  | 0.02757653   | 0.035 |
| hsa-miR-377 PAK1      | -0.0980312  | 0.502781     | 0.073 |
| hsa-miR-377 SOD1      | 0.1484146   | 0.3088048    | 0.318 |
| hsa-miR-377 SOD2      | 0.2994086   | 0.03662093   | 0.097 |
| hsa-miR-424 ANLN      | -0.5776743  | 1.754141e-18 | 0.001 |
| hsa-miR-424 ATF6      | 0.2182288   | 0.08172536   | 0.017 |
| hsa-miR-424 CCND1     | -0.4185318  | 0.002764278  | 0.025 |
| hsa-miR-424 CCND3     | -0.3393005  | 0.01707834   | 0.064 |
| hsa-miR-424 CCNE1     | -0.3714042  | 1.135029e-07 | 0.005 |
| hsa-miR-424 CCNF      | 0.3887736   | 0.005768082  | 0.082 |
| hsa-miR-424 CDC25A    | 0.09860838  | 0.4345156    | 0.159 |
| hsa-miR-424 CDK6      | -0.1901501  | 0.008248175  | 0.014 |
| hsa-miR-424 CHEK1     | 0.3167971   | 0.02656847   | 0.181 |
| hsa-miR-424 FGFR1     | -0.05860338 | 0.6428578    | 0.244 |
| hsa-miR-424 ITPR1     | -0.529214   | 8.25478e-08  | 0.03  |
| hsa-miR-424 KIF23     | 0.466014    | 0.0007391446 | 0.132 |

Table S2. Results obtained for the test on experimentally validated targets

|                       |              |              |       |
|-----------------------|--------------|--------------|-------|
| hsa-miR-424 MAP2K1    | 0.4911719    | 4.711787e-13 | 0.115 |
| hsa-miR-424 NFIA      | 0.3298461    | 2.981962e-06 | 0.019 |
| hsa-miR-424 PIAS1     | -0.2819862   | 7.41642e-05  | 0.004 |
| hsa-miR-424 PLAG1     | -0.08404762  | 0.5056381    | 0.269 |
| hsa-miR-424 WEE1      | 0.07528708   | 0.5511396    | 0.093 |
| hsa-miR-429 ERBB2IP   | 0.2310334    | 0.06407663   | 0.235 |
| hsa-miR-429 KLHL20    | -0.1821107   | 0.1465274    | 0.06  |
| hsa-miR-429 PTPRD     | -0.3587767   | 0.003337518  | 0.001 |
| hsa-miR-429 RERE      | 0.2133191    | 0.08797777   | 0.564 |
| hsa-miR-429 ZEB1      | -0.3305143   | 0.007166393  | 0.009 |
| hsa-miR-429 ZEB2      | 0.03756734   | 0.7663858    | 0.245 |
| hsa-miR-433 GRB2      | 0.07722375   | 0.5979158    | 0.059 |
| hsa-miR-449a WISP2    | -0.04650151  | 0.6442482    | 0.268 |
| hsa-miR-451 CAB39     | -0.02430098  | 0.7379458    | 0.037 |
| hsa-miR-451 MIF       | -0.1470045   | 0.04187896   | 0.038 |
| hsa-miR-485-3p NTRK3  | -0.08146478  | 0.5188495    | 0.109 |
| hsa-miR-486 FOXO1     | -0.2491617   | 0.0842663    | 0.118 |
| hsa-miR-491 TAF10     | 0.2260942    | 0.1182629    | 0.093 |
| hsa-miR-494 PTEN      | 0.1169182    | 0.3536559    | 0.06  |
| hsa-miR-503 ANLN      | 0.454511     | 0.001035447  | 0.082 |
| hsa-miR-503 ATF6      | 0.2494466    | 0.08390038   | 0.111 |
| hsa-miR-503 CCND1     | -0.09742772  | 0.4659883    | 0.078 |
| hsa-miR-503 CCNE1     | -0.06379429  | 0.63554      | 0.058 |
| hsa-miR-503 CCNE2     | -0.1313445   | 0.2969886    | 0.168 |
| hsa-miR-503 CCNF      | 0.2931199    | 0.01780444   | 0.076 |
| hsa-miR-503 CDC25A    | 0.2178256    | 0.08131817   | 0.022 |
| hsa-miR-503 CDKN1A    | 0.1091622    | 0.4552781    | 0.048 |
| hsa-miR-503 CHEK1     | 0.2388407    | 0.05535702   | 0.179 |
| hsa-miR-503 EIF2C1    | 0.1013131    | 0.4885172    | 0.207 |
| hsa-miR-503 WEE1      | -0.197922    | 0.1728141    | 0.19  |
| hsa-miR-512-5p MCL1   | -0.09116643  | 0.533291     | 0.093 |
| hsa-miR-516a-5p KLK10 | 0.0968207    | 0.3354523    | 0.079 |
| hsa-miR-519d CDKN1A   | -0.7749736   | 6.339812e-11 | 0.017 |
| hsa-miR-520h CDKN1A   | -0.7829142   | 2.998039e-11 | 0.012 |
| hsa-miR-520h SMAD6    | -0.04062731  | 0.7816542    | 0.341 |
| hsa-miR-559 MTA1      | -0.1434681   | 0.3253855    | 0.007 |
| hsa-miR-7 EGFR        | -0.001571122 | 0.9900897    | 0.001 |
| hsa-miR-7 IRS1        | -0.4301619   | 0.0003483637 | 0.131 |
| hsa-miR-7 IRS2        | -0.4690742   | 8.101943e-05 | 0.022 |
| hsa-miR-7 PAK1        | 0.3237832    | 0.02323855   | 0.088 |
| hsa-miR-7 RAF1        | 0.03751578   | 0.7980117    | 0.027 |
| hsa-miR-7 SNCA        | 0.2952452    | 0.03944405   | 0.071 |
| hsa-miR-92b CDKN1C    | 0.3429291    | 0.005166281  | 0.181 |
| hsa-miR-93 CDKN1A     | -0.6951722   | 2.980356e-08 | 0.004 |
| hsa-miR-93 MAPK9      | 0.3685167    | 1.446439e-07 | 0.01  |
| hsa-miR-93 PCAF       | -0.2742624   | 0.0001183331 | 0.001 |
| hsa-miR-93 TP53INP1   | -0.1667968   | 0.1881501    | 0.065 |
| hsa-miR-96 ADCY6      | 0.4393938    | 1.818479e-10 | 0.018 |
| hsa-miR-96 AQP5       | 0.002899795  | 0.9770401    | 0.151 |
| hsa-miR-96 CDKN1A     | -0.6627125   | 2.131955e-07 | 0.008 |
| hsa-miR-96 CELSR2     | 0.2840491    | 0.0479327    | 0.072 |
| hsa-miR-96 FOXO1      | 0.458442     | 5.707158e-11 | 0.001 |
| hsa-miR-96 IRS1       | -0.1065605   | 0.1412652    | 0.035 |

Table S2.Results obtained for the test on experimentally validated targets

|                   |             |              |       |
|-------------------|-------------|--------------|-------|
| hsa-miR-96 MITF   | 0.1383353   | 0.055681     | 0.208 |
| hsa-miR-96 MYRIP  | -0.1403145  | 0.05223732   | 0.008 |
| hsa-miR-96 ODF2   | -0.587397   | 9.125955e-06 | 0.003 |
| hsa-miR-96 RYK    | 0.05376723  | 0.7136786    | 0.011 |
| hsa-miR-98 E2F2   | 0.4671765   | 0.0007139184 | 0.027 |
| hsa-miR-98 HMGA2  | -0.4918842  | 0.0003312756 | 0.121 |
| hsa-miR-98 MYC    | -0.3619929  | 0.01059243   | 0.051 |
| hsa-miR-99a FGFR3 | -0.2318209  | 0.001214646  | 0.009 |
| hsa-miR-99a IGF1R | 0.1108882   | 0.3791958    | 0.13  |
| hsa-miR-9 BACE1   | -0.24934    | 0.0004872965 | 0.016 |
| hsa-miR-9 BCL6    | -0.09479417 | 0.3480055    | 0.06  |
| hsa-miR-9 CDH1    | 0.1534705   | 0.1517663    | 0.022 |
| hsa-miR-9 ETS1    | -0.2442359  | 0.000640206  | 0.009 |
| hsa-miR-9 FOXO1   | -0.3192012  | 6.400257e-06 | 0.056 |
| hsa-miR-9 MMP13   | 0.08214996  | 0.4140987    | 0.147 |
| hsa-miR-9 NFKB1   | -0.4746489  | 0.0005694184 | 0.004 |
| hsa-miR-9 ONECUT2 | 0.2036257   | 0.004613694  | 0.001 |
| hsa-miR-9 POU2F2  | -0.4176189  | 0.002830167  | 0.013 |
| hsa-miR-9 PRDM1   | -0.06254635 | 0.3887687    | 0.115 |
| hsa-miR-9 RAB34   | -0.6513947  | 4.006499e-07 | 0.001 |
| hsa-miR-9* RCOR1  | -0.1142264  | 0.1297812    | 0.024 |
| hsa-miR-9 REST    | -0.135335   | 0.06125764   | 0.104 |
