# Supplementary material for: Antagonism Pattern Detection between MicroRNA and Target Expression in Ewing’s Sarcoma
Source: PubMed Central journal article supplement (PMC3404966; doi:10.1371/journal.pone.0041770), 2012-07-25
Supplement: pone.0041770.s005.pdf [file pone.0041770.s005.pdf]

Table S3A

| Antagonism_miRNA_hub | Degree_connectivity |
|----------------------|---------------------|
| hsa-miR-342          | 1255                |
| hsa-miR-146b         | 1203                |
| hsa-miR-15a          | 1123                |
| hsa-miR-324-3p       | 1040                |
| hsa-miR-18a          | 1038                |
| hsa-miR-486          | 1036                |
| hsa-miR-328          | 1036                |
| hsa-miR-582          | 1003                |
| hsa-miR-25           | 986                 |
| hsa-miR-20b          | 984                 |
| hsa-miR-574          | 979                 |
| hsa-miR-363          | 978                 |
| hsa-miR-425-5p       | 961                 |
| HS_301               | 947                 |
| hsa-miR-192          | 937                 |
| hsa-mir-454-3p       | 925                 |
| hsa-miR-652          | 921                 |
| hsa-miR-92           | 915                 |
| hsa-miR-26a          | 915                 |
| hsa-miR-96           | 902                 |
| hsa-miR-125a         | 886                 |
| hsa-miR-30b          | 884                 |
| hsa-let-7i           | 883                 |
| hsa-miR-210          | 840                 |
| hsa-miR-93           | 837                 |
| hsa-miR-221          | 837                 |
| hsa-miR-339          | 836                 |
| hsa-miR-16           | 835                 |
| hsa-miR-423          | 834                 |
| hsa-miR-142-3p       | 815                 |
| hsa-miR-222          | 811                 |
| hsa-miR-484          | 804                 |
| hsa-miR-15b          | 801                 |
| hsa-miR-30e-5p       | 790                 |
| hsa-miR-594          | 788                 |
| hsa-miR-145          | 787                 |
| hsa-miR-28           | 781                 |
| hsa-miR-143          | 781                 |
| hsa-miR-194          | 778                 |
| hsa-miR-30d          | 776                 |
| hsa-miR-191          | 776                 |
| hsa-miR-29c          | 775                 |
| hsa-miR-518a         | 773                 |
| hsa-miR-148a         | 768                 |
| hsa-miR-148b         | 757                 |
| hsa-miR-768-3p       | 749                 |
| hsa-miR-576          | 742                 |
| HS_100               | 740                 |
| hsa-miR-185          | 738                 |
| hsa-miR-193a         | 734                 |
| hsa-miR-223          | 731                 |

Table S3A

|                |     |
|----------------|-----|
| hsa-miR-598    | 728 |
| hsa-miR-130b   | 728 |
| hsa-miR-22     | 724 |
| hsa-miR-199b   | 720 |
| hsa-miR-183    | 720 |
| hsa-miR-550    | 713 |
| hsa-miR-30e-3p | 702 |
| hsa-let-7d     | 697 |
| hsa-miR-19a    | 696 |
| hsa-miR-106b   | 691 |
| hsa-let-7f     | 690 |
| hsa-miR-31     | 687 |
| hsa-miR-99b    | 685 |
| hsa-miR-19b    | 679 |
| hsa-miR-374    | 677 |
| hsa-miR-296    | 675 |
| hsa-miR-193b   | 675 |
| hsa-miR-130a   | 674 |
| hsa-miR-323    | 663 |
| hsa-miR-361    | 657 |
| hsa-miR-30c    | 653 |
| hsa-miR-186    | 651 |
| hsa-miR-20a    | 648 |
| hsa-miR-326    | 641 |
| HS_192.1       | 641 |
| hsa-miR-7      | 629 |
| hsa-miR-18a*   | 620 |
| hsa-miR-199a   | 619 |
| hsa-miR-125b   | 618 |
| hsa-miR-182    | 616 |
| hsa-miR-320    | 615 |

Table S3B

| Antagonism_Target_hub | Degree_connectivity |
|-----------------------|---------------------|
| HFE                   | 88                  |
| PDLIM5                | 80                  |
| PTGER3                | 78                  |
| CFLAR                 | 71                  |
| SULF1                 | 70                  |
| ZFR                   | 69                  |
| MPZL1                 | 69                  |
| MAP4                  | 68                  |
| GM2A                  | 66                  |
| CTSB                  | 65                  |
| MCAM                  | 63                  |
| GTSE1                 | 63                  |
| TPM1                  | 62                  |
| SFRS14                | 62                  |
| PATZ1                 | 62                  |
| TCF3                  | 61                  |
| QKI                   | 61                  |
| PAFAH1B1              | 61                  |
| MARCKS                | 61                  |
| THBS1                 | 60                  |
| PBXIP1                | 60                  |
| EXOC7                 | 60                  |
| CD44                  | 59                  |
| ATG5                  | 59                  |
| UBE2J1                | 58                  |
| SMARCA4               | 58                  |
| RUNX1                 | 58                  |
| LAMA2                 | 58                  |
| ITGB5                 | 58                  |
| EPB41L3               | 58                  |
| GOSR2                 | 57                  |
| CYLD                  | 57                  |
| PIAS1                 | 56                  |
| MAX                   | 56                  |
| APLP2                 | 56                  |
| TRO                   | 55                  |
| TMF1                  | 55                  |
| PPIC                  | 55                  |
| PITPNA                | 55                  |
| CLN5                  | 55                  |
| CALD1                 | 55                  |
| SOCS5                 | 54                  |
| PDE4DIP               | 54                  |
| PAPSS2                | 54                  |
| ESR1                  | 54                  |
| EGFR                  | 54                  |
| SYNJ2                 | 53                  |
| S100A11               | 53                  |
| LOX                   | 53                  |
| GRB10                 | 53                  |
| VDR                   | 52                  |

Table S3B

|         |    |
|---------|----|
| RIOK3   | 52 |
| PTPN11  | 52 |
| PDLIM7  | 52 |
| NFIB    | 52 |
| LAMA4   | 52 |
| IL6ST   | 52 |
| GNL3L   | 52 |
| FGFR2   | 52 |
| DAB2    | 52 |
| CNOT4   | 52 |
| SEC14L1 | 51 |
| SCD     | 51 |
| PALLD   | 51 |
| EIF5B   | 51 |
| DR1     | 51 |
| CYP1B1  | 51 |
| CSNK1A1 | 51 |
| BUB1    | 51 |
| SS18    | 50 |
| SPTBN1  | 50 |
| SMAD3   | 50 |
| SDC2    | 50 |
| KRIT1   | 50 |
| COL1A1  | 50 |
| CD58    | 50 |
| CCPG1   | 50 |
| BCLAF1  | 50 |
| ABCF2   | 50 |
| YWHAZ   | 49 |
| TTC3    | 49 |
| TRIM33  | 49 |
| TIA1    | 49 |
| RRBP1   | 49 |
| RBM25   | 49 |
| PCMT1   | 49 |
| PAM     | 49 |
| MINK1   | 49 |
| KPNA1   | 49 |
| JAG1    | 49 |
| HEY1    | 49 |
| GRN     | 49 |
| CTBP2   | 49 |
| COL1A2  | 49 |
| VAMP2   | 48 |
| UTX     | 48 |
| TRAK1   | 48 |
| SSX2IP  | 48 |
| RFC1    | 48 |
| RAB31   | 48 |
| PPAP2A  | 48 |
| OMD     | 48 |
| MTAP    | 48 |
| MR1     | 48 |

Table S3B

|          |    |
|----------|----|
| MAP1LC3B | 48 |
| GALNT1   | 48 |
| DZIP3    | 48 |
| CDKN1C   | 48 |
| ZNF313   | 47 |
| ZMYM2    | 47 |
| WNK1     | 47 |
| TCF7L2   | 47 |
| SOX4     | 47 |
| PSME3    | 47 |
| PKNOX1   | 47 |
| MAP2K5   | 47 |
| COL3A1   | 47 |
| CLCN3    | 47 |
| ANK3     | 47 |
| UBE2N    | 46 |
| TRIM2    | 46 |
| TNPO1    | 46 |
| TJP1     | 46 |
| SP100    | 46 |
| SIP1     | 46 |
| PRKAR1A  | 46 |
| PBX1     | 46 |
| NUMA1    | 46 |
| LGALS8   | 46 |
| FGFR1    | 46 |
| DPYSL4   | 46 |
| COL6A1   | 46 |
| CMKLR1   | 46 |
| CD84     | 46 |
| CD59     | 46 |
| AKT3     | 46 |
| ABCA1    | 46 |
| VIL2     | 45 |
| TMEM47   | 45 |
| SENP6    | 45 |
| RAB1A    | 45 |
| PUM1     | 45 |
| PROSC    | 45 |
| PPIL2    | 45 |
| PHF3     | 45 |
| PCBP2    | 45 |
| PAPOLA   | 45 |
| NRG1     | 45 |
| NPM1     | 45 |
| NFATC1   | 45 |
| H2AFY    | 45 |
| EMP1     | 45 |
| AHNAK    | 45 |
| TOR1AIP1 | 44 |
| THY1     | 44 |
| THBD     | 44 |
| SRP72    | 44 |

Table S3B

|          |    |
|----------|----|
| SMTN     | 44 |
| SMARCA2  | 44 |
| PTP4A1   | 44 |
| NIPBL    | 44 |
| NBN      | 44 |
| NAP1L1   | 44 |
| MUC1     | 44 |
| LYN      | 44 |
| LHFPL2   | 44 |
| LAMP2    | 44 |
| GPM6B    | 44 |
| FER1L3   | 44 |
| EML1     | 44 |
| ATP2A2   | 44 |
| ASAH1    | 44 |
| ALDH3A2  | 44 |
| WDFY3    | 43 |
| USP34    | 43 |
| UPF3A    | 43 |
| TRAM2    | 43 |
| SYNCRIP  | 43 |
| SLC24A1  | 43 |
| SEMA3F   | 43 |
| QRSL1    | 43 |
| PPIG     | 43 |
| PGK1     | 43 |
| PEBP1    | 43 |
| PDCD6    | 43 |
| NSFL1C   | 43 |
| NDRG2    | 43 |
| MED6     | 43 |
| LAMP1    | 43 |
| HADHA    | 43 |
| GLS      | 43 |
| EPHB2    | 43 |
| DYNC2LI1 | 43 |
| DNAJB6   | 43 |
| COL5A3   | 43 |
| COL5A2   | 43 |
| CEP57    | 43 |
| ARL4C    | 43 |
| ARF4     | 43 |
| API5     | 43 |
| YIPF6    | 42 |
| SLC7A8   | 42 |
| PKNOX2   | 42 |
| PCM1     | 42 |
| NCLN     | 42 |
| MCF2L    | 42 |
| LMNA     | 42 |
| LAMC1    | 42 |
| ITSN1    | 42 |
| IL13RA1  | 42 |

Table S3B

|          |    |
|----------|----|
| HLA-DRB1 | 42 |
| HLA-C    | 42 |
| CSE1L    | 42 |
| ASF1A    | 42 |
| APOE     | 42 |
| ANGPTL2  | 42 |
| ALDH6A1  | 42 |
| WWTR1    | 41 |
| TIMP3    | 41 |
| SCP2     | 41 |
| RUNX1T1  | 41 |
| PTPRN2   | 41 |
| PRSS23   | 41 |
| PBX2     | 41 |
| NRIP1    | 41 |
| MLH3     | 41 |
| MET      | 41 |
| MACF1    | 41 |
| HNRPD    | 41 |
| HEXIM1   | 41 |
| HEMK1    | 41 |
| GSN      | 41 |
| GNAS     | 41 |
| GGA2     | 41 |
| GART     | 41 |
| FYN      | 41 |
| FKBP1A   | 41 |
| ENDOD1   | 41 |
| DLG3     | 41 |
| CUL5     | 41 |
| COL4A2   | 41 |
| CHMP2B   | 41 |
| CDC73    | 41 |
| BGN      | 41 |
| AUTS2    | 41 |
| ALMS1    | 41 |
| ADD3     | 41 |
| ZMYM6    | 40 |
| WDR59    | 40 |
| TNXB     | 40 |
| SUPT7L   | 40 |
| SLC29A1  | 40 |
| SLC11A2  | 40 |
| SAT1     | 40 |
| PPP2R1B  | 40 |
| PLXND1   | 40 |
| PHACTR2  | 40 |
| PARVA    | 40 |
| NPAS2    | 40 |
| NOL3     | 40 |
| NFYC     | 40 |
| MTMR1    | 40 |
| MLL      | 40 |

Table S3B

|           |    |
|-----------|----|
| LPP       | 40 |
| KIAA0494  | 40 |
| KDEL3     | 40 |
| ICAM1     | 40 |
| HNRPDL    | 40 |
| HMGB1     | 40 |
| HLA-DQB1  | 40 |
| GNA11     | 40 |
| FEM1B     | 40 |
| DPT       | 40 |
| CYB561    | 40 |
| BRD2      | 40 |
| ASPH      | 40 |
| ARF6      | 40 |
| ANK2      | 40 |
| ACLY      | 40 |
| UROD      | 39 |
| TM4SF1    | 39 |
| SPARC     | 39 |
| SIRT3     | 39 |
| SERINC3   | 39 |
| SENP3     | 39 |
| RYBP      | 39 |
| RPN2      | 39 |
| RERE      | 39 |
| RBPMS     | 39 |
| PTBP1     | 39 |
| PECAM1    | 39 |
| OGT       | 39 |
| NUFIP1    | 39 |
| MINA      | 39 |
| ME1       | 39 |
| LRRFIP1   | 39 |
| HIST1H2BD | 39 |
| GULP1     | 39 |
| GOLGA2    | 39 |
| GALNT10   | 39 |
| FAS       | 39 |
| DST       | 39 |
| DDX19A    | 39 |
| DAZAP2    | 39 |
| CDYL      | 39 |
| CD164     | 39 |
| BAT2D1    | 39 |
| ATP5L     | 39 |
| AKAP1     | 39 |
| WDR61     | 38 |
| WASL      | 38 |
| UBAP2L    | 38 |
| TNS1      | 38 |
| TM2D1     | 38 |
| STAT1     | 38 |
| SSR1      | 38 |



Table S3B

|          |    |
|----------|----|
| SNX13    | 38 |
| SMARCA1  | 38 |
| SLC35E1  | 38 |
| SHMT2    | 38 |
| SFRS11   | 38 |
| SCAMP1   | 38 |
| RRAS2    | 38 |
| PTPRF    | 38 |
| PTAFR    | 38 |
| PICALM   | 38 |
| PCSK5    | 38 |
| PAK2     | 38 |
| OBSL1    | 38 |
| NR2F2    | 38 |
| NCOA2    | 38 |
| MYH10    | 38 |
| MCM4     | 38 |
| LPL      | 38 |
| KLHL24   | 38 |
| KCTD12   | 38 |
| HEG1     | 38 |
| GIMAP5   | 38 |
| FAP      | 38 |
| EXOSC7   | 38 |
| ETV5     | 38 |
| EPN2     | 38 |
| ENTPD1   | 38 |
| ELOVL2   | 38 |
| ELK1     | 38 |
| EIF4E2   | 38 |
| DBT      | 38 |
| CX3CL1   | 38 |
| CUTL1    | 38 |
| CPD      | 38 |
| COL5A1   | 38 |
| COL11A1  | 38 |
| CES2     | 38 |
| CDK10    | 38 |
| CDC42EP1 | 38 |
| CALU     | 38 |
| ATP2B4   | 38 |
| AGA      | 38 |
| ABHD2    | 38 |
| WSB1     | 37 |
| WIP1     | 37 |
| WBP4     | 37 |
| VAMP3    | 37 |
| UBXD2    | 37 |
| U2AF2    | 37 |
| TLL5     | 37 |
| TRIO     | 37 |
| TPD52    | 37 |
| TOMM40   | 37 |

Table S3B

|           |    |
|-----------|----|
| TNS3      | 37 |
| TNFRSF10B | 37 |
| SPTAN1    | 37 |
| SP110     | 37 |
| SMARCC1   | 37 |
| SELPLG    | 37 |
| RHOQ      | 37 |
| REEP5     | 37 |
| RBM8A     | 37 |
| RAB33A    | 37 |
| PPP3CB    | 37 |
| PPP3CA    | 37 |
| PPP2R4    | 37 |
| PKN2      | 37 |
| PIGV      | 37 |
| PEX3      | 37 |
| PEA15     | 37 |
| PDE4A     | 37 |
| PDCD4     | 37 |
| PCOLCE    | 37 |
| PAFAH2    | 37 |
| NUAK1     | 37 |
| NEDD9     | 37 |
| MPHOSPH9  | 37 |
| IGF2BP3   | 37 |
| HSPG2     | 37 |
| HRK       | 37 |
| HMGCS1    | 37 |
| GTF2F1    | 37 |
| FGF1      | 37 |
| ENC1      | 37 |
| EML3      | 37 |
| EEF1D     | 37 |
| DKK3      | 37 |
| DDAH2     | 37 |
| DCN       | 37 |
| CUGBP1    | 37 |
| CEP63     | 37 |
| CEACAM1   | 37 |
| ATP6V1D   | 37 |
| ATP5S     | 37 |
| ARIH1     | 37 |
| ADCY9     | 37 |
| VEZF1     | 36 |
| TBXA2R    | 36 |
| STK38L    | 36 |
| SSH3      | 36 |
| SNX1      | 36 |
| SLC6A8    | 36 |
| SFRP1     | 36 |
| RNF24     | 36 |
| RNF128    | 36 |
| PRKCH     | 36 |

Table S3B

|          |    |
|----------|----|
| PRKCDBP  | 36 |
| PRDM2    | 36 |
| PLAU     | 36 |
| PDGFB    | 36 |
| NR3C1    | 36 |
| MYO1B    | 36 |
| METTTL7A | 36 |
| MEF2C    | 36 |
| MBNL1    | 36 |
| MBD2     | 36 |
| MAF      | 36 |
| LDLR     | 36 |
| JTB      | 36 |
| HTATIP   | 36 |
| ENSA     | 36 |
| DDX18    | 36 |
| CSRP2    | 36 |
| CNN3     | 36 |
| CLU      | 36 |
| CHD4     | 36 |
| CASP1    | 36 |
| CA12     | 36 |
| ATP2C1   | 36 |
| ARF3     | 36 |
| YTHDC1   | 35 |
| YME1L1   | 35 |
| TSR1     | 35 |
| TMEM118  | 35 |
| TGOLN2   | 35 |
| TFAM     | 35 |
| TEGT     | 35 |
| TCF25    | 35 |
| TCEA2    | 35 |
| STAB1    | 35 |
| SMYD2    | 35 |
| SMARCA5  | 35 |
| SMAD7    | 35 |
| SKP1A    | 35 |
| SAP18    | 35 |
| RHEB     | 35 |
| RECQL    | 35 |
| RASGRP2  | 35 |
| PTN      | 35 |
| PRPF4B   | 35 |
| PLAUR    | 35 |
| P4HA2    | 35 |
| NFYA     | 35 |
| MZF1     | 35 |
| MAFG     | 35 |
| LSM5     | 35 |
| LEPR     | 35 |
| LAPTM5   | 35 |
| KCNJ5    | 35 |

Table S3B

|         |    |
|---------|----|
| ILF3    | 35 |
| HRBL    | 35 |
| HNRPH3  | 35 |
| GPR116  | 35 |
| GOLGB1  | 35 |
| GARNL1  | 35 |
| FBLN1   | 35 |
| FAM13A1 | 35 |
| DSTN    | 35 |
| DOPEY1  | 35 |
| DLG1    | 35 |
| DIMT1L  | 35 |
| CTTN    | 35 |
| CTNND1  | 35 |
| CPT1A   | 35 |
| CPSF6   | 35 |
| CD200   | 35 |
| CAMK2G  | 35 |
| ANXA4   | 35 |
| AKAP13  | 35 |
| WVOX    | 34 |
| UBE4B   | 34 |
| UBE2D2  | 34 |
| TROVE2  | 34 |
| TNKS    | 34 |
| TLE2    | 34 |
| TBC1D9B | 34 |
| STOM    | 34 |
| STC2    | 34 |
| SMARCD1 | 34 |
| SFRS2B  | 34 |
| SFPQ    | 34 |
| SET     | 34 |
| SEMA6A  | 34 |
| SASH1   | 34 |
| RTN4    | 34 |
| RPS6KA2 | 34 |
| RNF10   | 34 |
| RBM5    | 34 |
| PTPRD   | 34 |
| PSPC1   | 34 |
| PSG9    | 34 |
| PLOD2   | 34 |
| PIP5K1A | 34 |
| OAZ2    | 34 |
| NOL5A   | 34 |
| NCOA4   | 34 |
| MTCP1   | 34 |
| MBNL2   | 34 |
| LAPTM4B | 34 |
| KLHDC3  | 34 |
| KLF9    | 34 |
| KDEL2   | 34 |

Table S3B

|         |    |
|---------|----|
| ITM2A   | 34 |
| IQGAP1  | 34 |
| IL8     | 34 |
| HPCAL1  | 34 |
| HLA-F   | 34 |
| HLA-E   | 34 |
| GRSF1   | 34 |
| GOLGA1  | 34 |
| FBXO38  | 34 |
| FBXO28  | 34 |
| ENPP2   | 34 |
| EIF1AY  | 34 |
| DTX3    | 34 |
| DKC1    | 34 |
| CYBB    | 34 |
| CUL4B   | 34 |
| CREB1   | 34 |
| CPNE3   | 34 |
| CIB2    | 34 |
| CDH1    | 34 |
| CD40    | 34 |
| CALCA   | 34 |
| APC     | 34 |
| AGTRL1  | 34 |
| ADARB1  | 34 |
| ADAM12  | 34 |
| ZNHIT4  | 33 |
| ZNF710  | 33 |
| ZFP36L2 | 33 |
| ZFP161  | 33 |
| YY1     | 33 |
| WTAP    | 33 |
| WDR48   | 33 |
| WDR23   | 33 |
| VPS13D  | 33 |
| TGFBR2  | 33 |
| TFPI    | 33 |
| SYT11   | 33 |
| SVEP1   | 33 |
| SLC16A3 | 33 |
| SLC16A1 | 33 |
| SKP2    | 33 |
| SF3A1   | 33 |
| SCARB2  | 33 |
| RUFY3   | 33 |
| RPL22   | 33 |
| RBM12B  | 33 |
| RAD23B  | 33 |
| RAD17   | 33 |
| PTRF    | 33 |
| PLEC1   | 33 |
| PGRMC1  | 33 |
| PDGFRA  | 33 |

Table S3B

|          |    |
|----------|----|
| OPTN     | 33 |
| NFATC2IP | 33 |
| NF1      | 33 |
| NAV3     | 33 |
| MYO6     | 33 |
| MYH9     | 33 |
| MPDZ     | 33 |
| MLLT10   | 33 |
| MKI67    | 33 |
| MGEA5    | 33 |
| MCM3AP   | 33 |
| MAPK14   | 33 |
| MAP4K5   | 33 |
| MAGI1    | 33 |
| KIAA0090 | 33 |
| KDELC1   | 33 |
| KCNJ8    | 33 |
| ITGBL1   | 33 |
| IGFBP7   | 33 |
| HRH1     | 33 |
| HAPLN1   | 33 |
| GPSM2    | 33 |
| GPR107   | 33 |
| GLUL     | 33 |
| FXR1     | 33 |
| FTL      | 33 |
| FN1      | 33 |
| ESPL1    | 33 |
| ELMO2    | 33 |
| EDG4     | 33 |
| CYP2C9   | 33 |
| CPT2     | 33 |
| CHN2     | 33 |
| CHN1     | 33 |
| CEACAM21 | 33 |
| CDV3     | 33 |
| CD46     | 33 |
| CAST     | 33 |
| CASP10   | 33 |
| CAMSAP1  | 33 |
| CAMK2B   | 33 |
| ASXL1    | 33 |
| ARMC8    | 33 |
| ARFIP1   | 33 |
| APP      | 33 |
| APBA2    | 33 |
| ALDH7A1  | 33 |
| AKAP11   | 33 |
| AIF1     | 33 |
| ADAMTS2  | 33 |
| ZNF536   | 32 |
| ZNF337   | 32 |
| ZNF224   | 32 |

Table S3B

|          |    |
|----------|----|
| WHSC1    | 32 |
| VAMP1    | 32 |
| UBE3A    | 32 |
| TMCO1    | 32 |
| THBS2    | 32 |
| SYNGR1   | 32 |
| STX16    | 32 |
| STAT6    | 32 |
| SFRS10   | 32 |
| SFI1     | 32 |
| SCARB1   | 32 |
| RXRB     | 32 |
| RGS3     | 32 |
| RASA1    | 32 |
| PTPN22   | 32 |
| PRMT2    | 32 |
| PPP2R5C  | 32 |
| PPP1CB   | 32 |
| PHF20    | 32 |
| PDGFA    | 32 |
| OTUB1    | 32 |
| OPCML    | 32 |
| NOTCH3   | 32 |
| NEK3     | 32 |
| NAB2     | 32 |
| MRPS31   | 32 |
| MEG3     | 32 |
| MEF2A    | 32 |
| LTBP1    | 32 |
| LST1     | 32 |
| KYNU     | 32 |
| KIAA1704 | 32 |
| KCNQ1    | 32 |
| ITM2B    | 32 |
| IFRD1    | 32 |
| HNMT     | 32 |
| HLA-B    | 32 |
| GPC1     | 32 |
| GGA1     | 32 |
| GATA2    | 32 |
| GAS7     | 32 |
| FOLR2    | 32 |
| ETV1     | 32 |
| ENO1     | 32 |
| EEF1E1   | 32 |
| DYRK2    | 32 |
| DDX28    | 32 |
| CSDE1    | 32 |
| COL6A2   | 32 |
| COL14A1  | 32 |
| CLTC     | 32 |
| CLEC4A   | 32 |
| CKAP4    | 32 |

Table S3B

|          |    |
|----------|----|
| CENTD3   | 32 |
| CD93     | 32 |
| BUB3     | 32 |
| BRAP     | 32 |
| BCAP29   | 32 |
| BAZ2A    | 32 |
| BAT1     | 32 |
| ATG12    | 32 |
| ARHGAP25 | 32 |
| AQP1     | 32 |
| APPBP2   | 32 |
| APH1B    | 32 |
| AP2A2    | 32 |
| ANXA7    | 32 |
| ACTR3    | 32 |
| ACTN1    | 32 |
| ACSL3    | 32 |
| ACOX1    | 32 |
| ZNF667   | 31 |
| ZBTB20   | 31 |
| VGLL4    | 31 |
| ULK2     | 31 |
| TRIM23   | 31 |
| TRAM1    | 31 |
| TP53I3   | 31 |
| TOM1L1   | 31 |
| TMEM66   | 31 |
| TMED9    | 31 |
| TLE1     | 31 |
| TFAP2A   | 31 |
| TCP1     | 31 |
| TBX2     | 31 |
| TBL1X    | 31 |
| TAX1BP1  | 31 |
| SVIL     | 31 |
| STARD8   | 31 |
| SRPX2    | 31 |
| SPAG9    | 31 |
| SOX9     | 31 |
| SOX11    | 31 |
| SLC7A6   | 31 |
| SLC28A1  | 31 |
| SFRS5    | 31 |
| SERBP1   | 31 |
| SEC63    | 31 |
| SEC24D   | 31 |
| S100A4   | 31 |
| RNF13    | 31 |
| RFK      | 31 |
| RAP2C    | 31 |
| RAMP3    | 31 |
| RAD50    | 31 |
| RABL4    | 31 |



Table S3B

|          |    |
|----------|----|
| RABGGTB  | 31 |
| RABGAP1  | 31 |
| PWP1     | 31 |
| PRUNE    | 31 |
| PPFIA1   | 31 |
| PLXNC1   | 31 |
| PGF      | 31 |
| PCSK6    | 31 |
| PARVB    | 31 |
| NOL7     | 31 |
| MXI1     | 31 |
| MTMR2    | 31 |
| MMP2     | 31 |
| MED8     | 31 |
| MCL1     | 31 |
| MAP3K5   | 31 |
| MAG      | 31 |
| LRRFIP2  | 31 |
| LPHN1    | 31 |
| LIMK2    | 31 |
| KIAA1033 | 31 |
| KIAA0652 | 31 |
| JUN      | 31 |
| HLF      | 31 |
| HLA-G    | 31 |
| HIVEP2   | 31 |
| GNB1     | 31 |
| GLP1R    | 31 |
| FUS      | 31 |
| FOLH1    | 31 |
| FBXO21   | 31 |
| ENG      | 31 |
| EIF4B    | 31 |
| EGR1     | 31 |
| DNAJC4   | 31 |
| DCTD     | 31 |
| CPE      | 31 |
| CHST3    | 31 |
| ARL1     | 31 |
| ARFGEF1  | 31 |
| APOL2    | 31 |
| ZNF395   | 30 |
| ZFP36L1  | 30 |
| WAPAL    | 30 |
| UMPS     | 30 |
| UBR2     | 30 |
| UBE2I    | 30 |
| TXNIP    | 30 |
| TSPAN15  | 30 |
| TP53AP1  | 30 |
| TMEM4    | 30 |
| TMEM111  | 30 |
| TLOC1    | 30 |

Table S3B

|          |    |
|----------|----|
| TGFBI    | 30 |
| TFG      | 30 |
| TEAD4    | 30 |
| TAX1BP3  | 30 |
| TAF6L    | 30 |
| TACC1    | 30 |
| STX12    | 30 |
| SQLE     | 30 |
| SPON1    | 30 |
| SPN      | 30 |
| SPG7     | 30 |
| SOS1     | 30 |
| SMCHD1   | 30 |
| SLC6A2   | 30 |
| SLC39A1  | 30 |
| SLC1A4   | 30 |
| SLC15A2  | 30 |
| SFRS2IP  | 30 |
| SERPINB6 | 30 |
| SEPHS1   | 30 |
| SEC31A   | 30 |
| SAMD4A   | 30 |
| RNASET2  | 30 |
| RBL2     | 30 |
| RARA     | 30 |
| PVR      | 30 |
| PTPRC    | 30 |
| PTPN12   | 30 |
| PPM1F    | 30 |
| PPIB     | 30 |
| PPAP2B   | 30 |
| PLEKHA5  | 30 |
| PHLDA1   | 30 |
| PHKB     | 30 |
| PHF11    | 30 |
| PAX3     | 30 |
| OSBPL3   | 30 |
| OCRL     | 30 |
| NQO1     | 30 |
| NOTCH2   | 30 |
| NEK11    | 30 |
| NCOR1    | 30 |
| MIA3     | 30 |
| MAP4K4   | 30 |
| LIMS1    | 30 |
| KRT19    | 30 |
| KRAS     | 30 |
| KIAA0859 | 30 |
| JAKMIP2  | 30 |
| IVD      | 30 |
| ITSN2    | 30 |
| ITGA6    | 30 |
| IRS2     | 30 |

Table S3B

|          |    |
|----------|----|
| IL1RL1   | 30 |
| IL17RC   | 30 |
| IGFBP5   | 30 |
| IGF1     | 30 |
| IAPP     | 30 |
| HSPA4    | 30 |
| HSP90B1  | 30 |
| HLA-DRA  | 30 |
| HINT1    | 30 |
| GYG1     | 30 |
| GTF2I    | 30 |
| GPR172A  | 30 |
| GNS      | 30 |
| GDPD5    | 30 |
| FSCN1    | 30 |
| FLI1     | 30 |
| FHL1     | 30 |
| FGF18    | 30 |
| EPOR     | 30 |
| EIF5     | 30 |
| EIF1     | 30 |
| DZIP1    | 30 |
| DUSP6    | 30 |
| CYFIP2   | 30 |
| CXCR4    | 30 |
| CUL2     | 30 |
| CTDSP2   | 30 |
| CPSF1    | 30 |
| CHST5    | 30 |
| CEACAM6  | 30 |
| CDC2L5   | 30 |
| CCND2    | 30 |
| BIRC5    | 30 |
| BCL2     | 30 |
| AURKA    | 30 |
| AP2S1    | 30 |
| ADAM22   | 30 |
| ABCG1    | 30 |
| ZNF223   | 29 |
| UBE2H    | 29 |
| UBE2B    | 29 |
| TRAFD1   | 29 |
| TPP2     | 29 |
| TMEM97   | 29 |
| TMEM1    | 29 |
| THRA     | 29 |
| TFRC     | 29 |
| TAPBP    | 29 |
| SUB1     | 29 |
| STK24    | 29 |
| SNAP23   | 29 |
| SLCO2B1  | 29 |
| SLC25A36 | 29 |

Table S3B

|           |    |
|-----------|----|
| SFRS8     | 29 |
| RNF41     | 29 |
| RGS5      | 29 |
| RARB      | 29 |
| RANBP9    | 29 |
| PUM2      | 29 |
| PREPL     | 29 |
| POLG      | 29 |
| PMS2L11   | 29 |
| PLEKHC1   | 29 |
| PIGL      | 29 |
| PHTF1     | 29 |
| PDK2      | 29 |
| PASK      | 29 |
| OLFML2B   | 29 |
| NKTR      | 29 |
| NEK1      | 29 |
| NDUFA5    | 29 |
| MME       | 29 |
| LUM       | 29 |
| LRDD      | 29 |
| KIF20A    | 29 |
| KIAA1539  | 29 |
| JMJD2B    | 29 |
| IGHD      | 29 |
| IGF2      | 29 |
| HTRA1     | 29 |
| HNRPH1    | 29 |
| HIST1H2AJ | 29 |
| HEPH      | 29 |
| GTPBP4    | 29 |
| GPX3      | 29 |
| GPC4      | 29 |
| GCDH      | 29 |
| GAS6      | 29 |
| FBXO11    | 29 |
| EZH1      | 29 |
| EDG2      | 29 |
| EBAG9     | 29 |
| DICER1    | 29 |
| DDR1      | 29 |
| DCUN1D4   | 29 |
| CYP3A4    | 29 |
| CUGBP2    | 29 |
| CSDA      | 29 |
| COPB2     | 29 |
| COL4A1    | 29 |
| COL18A1   | 29 |
| CIRBP     | 29 |
| CEP152    | 29 |
| CDH5      | 29 |
| CD55      | 29 |
| CD300A    | 29 |

Table S3B

|           |    |
|-----------|----|
| CAPN3     | 29 |
| BNIP3     | 29 |
| B3GAT3    | 29 |
| ATP8A2    | 29 |
| ATF7IP    | 29 |
| ARTN      | 29 |
| APBB2     | 29 |
| AP2B1     | 29 |
| AHCYL1    | 29 |
| ABHD6     | 29 |
| ABCC6     | 29 |
| ZNF638    | 28 |
| ZNF609    | 28 |
| ZNF451    | 28 |
| ZNF292    | 28 |
| YLPM1     | 28 |
| WIZ       | 28 |
| WDR45     | 28 |
| VAMP4     | 28 |
| TXN       | 28 |
| TTLL3     | 28 |
| TREX1     | 28 |
| TRADD     | 28 |
| TPI1      | 28 |
| TNPO2     | 28 |
| TMEM80    | 28 |
| TDRD3     | 28 |
| TCIRG1    | 28 |
| TBL1XR1   | 28 |
| TBC1D12   | 28 |
| SULT1A1   | 28 |
| SUCLG2    | 28 |
| STAG2     | 28 |
| SPTLC1    | 28 |
| SORBS3    | 28 |
| SNRK      | 28 |
| SLIT3     | 28 |
| SLC35E2   | 28 |
| SH3BP2    | 28 |
| SFRS7     | 28 |
| SFRS3     | 28 |
| RUNX3     | 28 |
| RSL1D1    | 28 |
| RPS6KB1   | 28 |
| RPA1      | 28 |
| RNASE4    | 28 |
| RFX5      | 28 |
| RANBP5    | 28 |
| RAD23A    | 28 |
| RAB11FIP2 | 28 |
| PSMA7     | 28 |
| PSIP1     | 28 |
| PSD3      | 28 |

## Table S3B

|          |    |
|----------|----|
| PPP3CC   | 28 |
| PPIF     | 28 |
| PPFIBP1  | 28 |
| PPFIA3   | 28 |
| PNPLA4   | 28 |
| PLXNA2   | 28 |
| PLA2G4A  | 28 |
| PDK3     | 28 |
| PDGFRL   | 28 |
| PCGF2    | 28 |
| PARP8    | 28 |
| OSBPL10  | 28 |
| OLFM1    | 28 |
| OAS2     | 28 |
| NUDT4    | 28 |
| NTRK2    | 28 |
| NT5E     | 28 |
| NR4A1    | 28 |
| NNT      | 28 |
| NEK2     | 28 |
| NCK1     | 28 |
| MGP      | 28 |
| MFAP5    | 28 |
| MARS     | 28 |
| MAPT     | 28 |
| MAPRE2   | 28 |
| MAOA     | 28 |
| MAGI2    | 28 |
| LSM14A   | 28 |
| LRPPRC   | 28 |
| LOXL2    | 28 |
| LEF1     | 28 |
| LCMT2    | 28 |
| KLHL20   | 28 |
| JAG2     | 28 |
| IVNS1ABP | 28 |
| IFT122   | 28 |
| HNRPA3   | 28 |
| HMGCR    | 28 |
| HBS1L    | 28 |
| GOLGA8B  | 28 |
| GNPTAB   | 28 |
| GNG11    | 28 |
| GNAI1    | 28 |
| GLYAT    | 28 |
| GCLC     | 28 |
| GATAD1   | 28 |
| GAPVD1   | 28 |
| FBN1     | 28 |
| EXOSC2   | 28 |
| EPB41L2  | 28 |
| ELN      | 28 |
| EHD2     | 28 |

Table S3B

|          |    |
|----------|----|
| DLGAP1   | 28 |
| DLG2     | 28 |
| CYB5A    | 28 |
| CTDSPL   | 28 |
| CLTA     | 28 |
| CLASP2   | 28 |
| CFDP1    | 28 |
| CDC27    | 28 |
| CD63     | 28 |
| CCNG2    | 28 |
| CALML4   | 28 |
| BTN3A1   | 28 |
| AZIN1    | 28 |
| ASMTL    | 28 |
| ARHGEF15 | 28 |
| ARHGEF10 | 28 |
| ANK1     | 28 |
| ALDH5A1  | 28 |
| AK2      | 28 |
| ABCC10   | 28 |
| ABAT     | 28 |
| ZNF587   | 27 |
| ZNF45    | 27 |
| ZNF3     | 27 |
| ZDHHC17  | 27 |
| WIP1     | 27 |
| WEE1     | 27 |
| VDAC3    | 27 |
| VCAM1    | 27 |
| USP3     | 27 |
| UPK1B    | 27 |
| UNC84A   | 27 |
| UBOX5    | 27 |
| UBE3B    | 27 |
| TTK      | 27 |
| TRAK2    | 27 |
| TNIP2    | 27 |
| TNFAIP1  | 27 |
| TMEM43   | 27 |
| TMED5    | 27 |
| TMCC1    | 27 |
| TGIF2    | 27 |
| STS      | 27 |
| STOML1   | 27 |
| SSBP2    | 27 |
| SPATS2   | 27 |
| SPATA5L1 | 27 |
| SPAST    | 27 |
| SLC39A8  | 27 |
| SLC16A5  | 27 |
| SKAP2    | 27 |
| SH3BP5   | 27 |
| SGSH     | 27 |

Table S3B

|           |    |
|-----------|----|
| SERINC5   | 27 |
| SEMA3C    | 27 |
| SEC24A    | 27 |
| SCG5      | 27 |
| SATL1     | 27 |
| SART3     | 27 |
| SAR1A     | 27 |
| SALL2     | 27 |
| RSF1      | 27 |
| RRN3      | 27 |
| RHOBTB3   | 27 |
| RAB5A     | 27 |
| RAB11FIP3 | 27 |
| PSME4     | 27 |
| PRKCA     | 27 |
| PPP1R10   | 27 |
| PLAGL1    | 27 |
| PGRMC2    | 27 |
| PGLS      | 27 |
| PEX10     | 27 |
| PDIA6     | 27 |
| PABPN1    | 27 |
| PA2G4     | 27 |
| NUP50     | 27 |
| NFATC3    | 27 |
| NCOA1     | 27 |
| NADK      | 27 |
| MSR1      | 27 |
| MRS2L     | 27 |
| MICAL2    | 27 |
| MATR3     | 27 |
| LYST      | 27 |
| LTBP4     | 27 |
| LMCD1     | 27 |
| LIAS      | 27 |
| LDB3      | 27 |
| LARP5     | 27 |
| KSR1      | 27 |
| KPNB1     | 27 |
| KCTD2     | 27 |
| ITPR2     | 27 |
| ITGB3     | 27 |
| ITGB1     | 27 |
| INTS7     | 27 |
| INHBC     | 27 |
| IFI16     | 27 |
| HOMER3    | 27 |
| HD        | 27 |
| GSTA1     | 27 |
| GRIN1     | 27 |
| GDF10     | 27 |
| GAS2L1    | 27 |
| FZD2      | 27 |



Table S3B

|          |    |
|----------|----|
| FXR2     | 27 |
| FOXN2    | 27 |
| FNDC3A   | 27 |
| FKBP1B   | 27 |
| FARP1    | 27 |
| FAM8A1   | 27 |
| EXT2     | 27 |
| EPHB4    | 27 |
| EIF4G3   | 27 |
| EIF2S1   | 27 |
| DPYD     | 27 |
| DOK5     | 27 |
| DNAJB9   | 27 |
| DGUOK    | 27 |
| DERL1    | 27 |
| DDX3Y    | 27 |
| DCPS     | 27 |
| CYP3A5   | 27 |
| CYP2E1   | 27 |
| CTSS     | 27 |
| CSF1     | 27 |
| CRKRS    | 27 |
| CRK      | 27 |
| CDH11    | 27 |
| CD151    | 27 |
| CCND1    | 27 |
| CAV2     | 27 |
| CASP8    | 27 |
| CASP4    | 27 |
| CACNA1G  | 27 |
| BNIP3L   | 27 |
| BCL11A   | 27 |
| BAT3     | 27 |
| B4GALT5  | 27 |
| B4GALNT1 | 27 |
| ATM      | 27 |
| ARPC2    | 27 |
| ARL6IP5  | 27 |
| ANP32A   | 27 |
| ALS2CR8  | 27 |
| ALK      | 27 |
| AKAP8L   | 27 |
| ADCY3    | 27 |
| ADA      | 27 |
| ACCN2    | 27 |
| ABI1     | 27 |
| ABCD4    | 27 |
| ZNF354A  | 26 |
| ZNF131   | 26 |
| YWHAQ    | 26 |
| XRCC4    | 26 |
| WWP1     | 26 |
| WDR68    | 26 |

Table S3B

|          |    |
|----------|----|
| WDR19    | 26 |
| WDR1     | 26 |
| TOB2     | 26 |
| TGM4     | 26 |
| TCF12    | 26 |
| TBC1D17  | 26 |
| TAOK2    | 26 |
| TANK     | 26 |
| TAF9     | 26 |
| TACC2    | 26 |
| SYNPO    | 26 |
| SYDE1    | 26 |
| STK17A   | 26 |
| STC1     | 26 |
| SPTLC2   | 26 |
| SNCA     | 26 |
| SLC4A7   | 26 |
| SLC35D1  | 26 |
| SLC33A1  | 26 |
| SLC23A2  | 26 |
| SLC19A1  | 26 |
| SLC16A7  | 26 |
| SGCE     | 26 |
| SFXN3    | 26 |
| SEZ6L    | 26 |
| SEC23B   | 26 |
| RMND5A   | 26 |
| RING1    | 26 |
| RIN3     | 26 |
| RFTN1    | 26 |
| PTPN1    | 26 |
| PSCD4    | 26 |
| PRKACB   | 26 |
| PPP1R2   | 26 |
| PPP1R12A | 26 |
| POU6F1   | 26 |
| PODXL    | 26 |
| PNPLA2   | 26 |
| PLXNA1   | 26 |
| PLA2G6   | 26 |
| PKP4     | 26 |
| PINK1    | 26 |
| PIGO     | 26 |
| PHKA1    | 26 |
| PEX11A   | 26 |
| PDE4C    | 26 |
| PDE3B    | 26 |
| PDE1C    | 26 |
| OPA1     | 26 |
| NXN      | 26 |
| NUDT13   | 26 |
| NRP1     | 26 |
| NNMT     | 26 |

Table S3B

|           |    |
|-----------|----|
| NFIC      | 26 |
| NFATC4    | 26 |
| NEK9      | 26 |
| NCOA3     | 26 |
| MYL4      | 26 |
| MYCBP     | 26 |
| MTUS1     | 26 |
| MTSS1     | 26 |
| MTMR4     | 26 |
| MTMR11    | 26 |
| MRPL9     | 26 |
| MMP14     | 26 |
| MIPEP     | 26 |
| MFN1      | 26 |
| MBD4      | 26 |
| MAST2     | 26 |
| MAPK8IP3  | 26 |
| MAP3K7IP2 | 26 |
| MAP1A     | 26 |
| MAGED1    | 26 |
| KLF6      | 26 |
| KLF12     | 26 |
| KIAA1467  | 26 |
| KIAA0913  | 26 |
| KIAA0368  | 26 |
| KAL1      | 26 |
| IPO7      | 26 |
| IMPDH2    | 26 |
| IMPACT    | 26 |
| ICA1      | 26 |
| HOXB7     | 26 |
| GPR177    | 26 |
| GOLGA4    | 26 |
| GNG7      | 26 |
| GHITM     | 26 |
| GABRR1    | 26 |
| FOSL2     | 26 |
| FMR1      | 26 |
| FLOT1     | 26 |
| FLNA      | 26 |
| FASTK     | 26 |
| FAM69A    | 26 |
| EXOSC4    | 26 |
| ETF1      | 26 |
| EPS15     | 26 |
| EPHA5     | 26 |
| EED       | 26 |
| DPF3      | 26 |
| DOCK6     | 26 |
| DIP2C     | 26 |
| DDX17     | 26 |
| DAG1      | 26 |
| CTSC      | 26 |

Table S3B

|          |    |
|----------|----|
| CTNNA1   | 26 |
| CRKL     | 26 |
| COX11    | 26 |
| COL4A6   | 26 |
| CITED2   | 26 |
| CHST2    | 26 |
| CHMP4A   | 26 |
| CDH2     | 26 |
| CDC42BPA | 26 |
| CD47     | 26 |
| CCNA1    | 26 |
| CC2D1A   | 26 |
| CBFA2T2  | 26 |
| CAV1     | 26 |
| BCL2L1   | 26 |
| ATP6AP2  | 26 |
| ATG4A    | 26 |
| ARIH2    | 26 |
| AGPAT1   | 26 |
| ADD2     | 26 |
| ADAM19   | 26 |
| ACSM3    | 26 |
| ACRV1    | 26 |
| ZMYM4    | 25 |
| ZFAND6   | 25 |
| ZBTB1    | 25 |
| WDR42A   | 25 |
| VCP      | 25 |
| TXNDC4   | 25 |
| TTC27    | 25 |
| TSPAN4   | 25 |
| TRAF3IP3 | 25 |
| TPM4     | 25 |
| TMEM9B   | 25 |
| TMCO6    | 25 |
| TCF4     | 25 |
| TBCE     | 25 |
| TBC1D2B  | 25 |
| STAT2    | 25 |
| SRPK2    | 25 |
| SRI      | 25 |
| SRD5A1   | 25 |
| SPSB3    | 25 |
| SOX18    | 25 |
| SOX15    | 25 |
| SOD2     | 25 |
| SNRPB    | 25 |
| SMC4     | 25 |
| SLC35A3  | 25 |
| SLC35A2  | 25 |
| SLC11A1  | 25 |
| SLAMF8   | 25 |
| SIRPA    | 25 |

Table S3B

|           |    |
|-----------|----|
| SHC1      | 25 |
| SH2B1     | 25 |
| SFTPC     | 25 |
| SATB2     | 25 |
| S100A13   | 25 |
| RTF1      | 25 |
| RPS6KA3   | 25 |
| ROD1      | 25 |
| RNASE1    | 25 |
| RHOD      | 25 |
| RER1      | 25 |
| RB1CC1    | 25 |
| RARG      | 25 |
| RAP1GDS1  | 25 |
| PSMC2     | 25 |
| PRKAR2A   | 25 |
| PRKAB1    | 25 |
| PRDX2     | 25 |
| PQBP1     | 25 |
| PPP2CB    | 25 |
| PPFIBP2   | 25 |
| PPBP      | 25 |
| POLDIP3   | 25 |
| PLSCR1    | 25 |
| PDZRN3    | 25 |
| PCSK7     | 25 |
| ORC5L     | 25 |
| ODZ4      | 25 |
| NTRK3     | 25 |
| NRF1      | 25 |
| NGLY1     | 25 |
| NDST1     | 25 |
| NCAM1     | 25 |
| MTRF1L    | 25 |
| MTMR9     | 25 |
| MSH3      | 25 |
| MKRN1     | 25 |
| METTL3    | 25 |
| METAP2    | 25 |
| MCF2      | 25 |
| LSS       | 25 |
| LRP12     | 25 |
| LOH11CR2A | 25 |
| LARP1     | 25 |
| L3MBTL    | 25 |
| KMO       | 25 |
| KIAA1109  | 25 |
| KIAA0226  | 25 |
| KCNQ2     | 25 |
| KATNB1    | 25 |
| IPO4      | 25 |
| INPP1     | 25 |
| IFT88     | 25 |

Table S3B

|           |    |
|-----------|----|
| HSDL2     | 25 |
| HOXB6     | 25 |
| HIST1H2BK | 25 |
| HIPK3     | 25 |
| HERC4     | 25 |
| HDHD1A    | 25 |
| GTF2IRD1  | 25 |
| GNB5      | 25 |
| GNAI3     | 25 |
| GMFG      | 25 |
| GLRX      | 25 |
| GJA4      | 25 |
| GFPT1     | 25 |
| GDF11     | 25 |
| FKBP4     | 25 |
| FKBP11    | 25 |
| FGFR10P   | 25 |
| FAM117A   | 25 |
| EML2      | 25 |
| ELOVL4    | 25 |
| ELK4      | 25 |
| EDNRB     | 25 |
| EDA       | 25 |
| DUOX1     | 25 |
| DNAJB4    | 25 |
| DFFA      | 25 |
| DDX3X     | 25 |
| DBI       | 25 |
| CTBS      | 25 |
| CTBP1     | 25 |
| CREBBP    | 25 |
| CORO1C    | 25 |
| COL15A1   | 25 |
| COL13A1   | 25 |
| CIZ1      | 25 |
| CFH       | 25 |
| CEP164    | 25 |
| CENPF     | 25 |
| CENPA     | 25 |
| CDR2L     | 25 |
| CCDC93    | 25 |
| CAP1      | 25 |
| CA2       | 25 |
| C1QTNF1   | 25 |
| C1QB      | 25 |
| BLVRA     | 25 |
| ATRNL1    | 25 |
| ATP6V1C1  | 25 |
| ATP6V1A   | 25 |
| ATP5C1    | 25 |
| ATP2B1    | 25 |
| ARHGEF12  | 25 |
| ARHGAP29  | 25 |

Table S3B

|          |    |
|----------|----|
| ARHGAP1  | 25 |
| ANP32E   | 25 |
| ANGPT1   | 25 |
| ANAPC5   | 25 |
| AMD1     | 25 |
| ACACB    | 25 |
| ABI2     | 25 |
| ZNF93    | 24 |
| ZNF500   | 24 |
| ZNF467   | 24 |
| YES1     | 24 |
| VPS24    | 24 |
| USP9X    | 24 |
| USP21    | 24 |
| UNC13B   | 24 |
| UBE2L3   | 24 |
| UBE2G1   | 24 |
| TSFM     | 24 |
| TRIM38   | 24 |
| TRIM3    | 24 |
| TRIM10   | 24 |
| TOM1     | 24 |
| TNFRSF21 | 24 |
| TMPO     | 24 |
| TCEB1    | 24 |
| TBC1D4   | 24 |
| TBC1D22A | 24 |
| TAPBPL   | 24 |
| TAP2     | 24 |
| SUZ12P   | 24 |
| SUPT3H   | 24 |
| STCH     | 24 |
| SSX3     | 24 |
| SPRY1    | 24 |
| SNRPA1   | 24 |
| SMG7     | 24 |
| SLC39A6  | 24 |
| SLC38A2  | 24 |
| SLC38A1  | 24 |
| SLC25A23 | 24 |
| SLC13A3  | 24 |
| SIGLEC1  | 24 |
| SFRS1    | 24 |
| SF3B3    | 24 |
| SETX     | 24 |
| SERTAD2  | 24 |
| RSBN1    | 24 |
| RREB1    | 24 |
| RPL31    | 24 |
| ROBO1    | 24 |
| RNASE6   | 24 |
| RGS4     | 24 |
| RDH8     | 24 |

Table S3B

|          |    |
|----------|----|
| RBM12    | 24 |
| RBCK1    | 24 |
| RAB7L1   | 24 |
| PSMF1    | 24 |
| PRR5     | 24 |
| PRDX6    | 24 |
| PPP4R2   | 24 |
| PPP2CA   | 24 |
| PNRC1    | 24 |
| PNN      | 24 |
| PMP22    | 24 |
| PLS3     | 24 |
| PLEKHB2  | 24 |
| PIK3R1   | 24 |
| PIK3CD   | 24 |
| PCSK2    | 24 |
| PARD3    | 24 |
| PAPOLG   | 24 |
| OXTR     | 24 |
| OBSCN    | 24 |
| NUSAP1   | 24 |
| NPHP4    | 24 |
| NOLC1    | 24 |
| NCBP2    | 24 |
| NAPA     | 24 |
| MYO1D    | 24 |
| MXRA5    | 24 |
| MUT      | 24 |
| MTDH     | 24 |
| MRPS18B  | 24 |
| MPI      | 24 |
| LYPLA1   | 24 |
| LRFN3    | 24 |
| LMBRD1   | 24 |
| LGR5     | 24 |
| LDHB     | 24 |
| LASS6    | 24 |
| KLHL9    | 24 |
| KIAA0372 | 24 |
| KIAA0182 | 24 |
| KIAA0101 | 24 |
| KCNG1    | 24 |
| INPP5A   | 24 |
| IMPAD1   | 24 |
| IL1B     | 24 |
| HMGCL    | 24 |
| HLA-DPA1 | 24 |
| HEXA     | 24 |
| HERPUD1  | 24 |
| HAP1     | 24 |
| GPR137   | 24 |
| GPHN     | 24 |
| GLG1     | 24 |



Table S3B

|          |    |
|----------|----|
| GJA1     | 24 |
| GEMIN4   | 24 |
| GATM     | 24 |
| FRYL     | 24 |
| EP300    | 24 |
| EHMT2    | 24 |
| EEF1G    | 24 |
| EDNRA    | 24 |
| ECD      | 24 |
| DOK4     | 24 |
| DLAT     | 24 |
| DIAPH2   | 24 |
| DDEF1    | 24 |
| DAP      | 24 |
| CYB5B    | 24 |
| CSNK1E   | 24 |
| CREBL2   | 24 |
| CRAT     | 24 |
| COX5B    | 24 |
| COX15    | 24 |
| CLTB     | 24 |
| CLCC1    | 24 |
| CHERP    | 24 |
| CEP350   | 24 |
| CELSR2   | 24 |
| CEACAM7  | 24 |
| CDK2     | 24 |
| CDC42EP3 | 24 |
| CCDC6    | 24 |
| CARS     | 24 |
| CARD10   | 24 |
| CAMK1G   | 24 |
| CACNA1A  | 24 |
| BRF2     | 24 |
| BMP6     | 24 |
| BMP1     | 24 |
| BCL10    | 24 |
| AYTL2    | 24 |
| ATP13A3  | 24 |
| ATN1     | 24 |
| ATF2     | 24 |
| ASPN     | 24 |
| ARHGDI1A | 24 |
| AMFR     | 24 |
| ALDOA    | 24 |
| ACTB     | 24 |
| A2M      | 24 |
| ZNF518   | 23 |
| ZDHHC3   | 23 |
| ZDHHC11  | 23 |
| YIPF3    | 23 |
| WDTC1    | 23 |
| UTY      | 23 |

Table S3B

|          |    |
|----------|----|
| USP24    | 23 |
| USP14    | 23 |
| UBXD7    | 23 |
| UBL3     | 23 |
| UBE2E1   | 23 |
| UBE1L    | 23 |
| TSPAN31  | 23 |
| TRIM9    | 23 |
| TNRC4    | 23 |
| TNC      | 23 |
| TMEM30A  | 23 |
| TLE3     | 23 |
| THUMPD1  | 23 |
| TBK1     | 23 |
| TAF1     | 23 |
| SYT5     | 23 |
| ST7      | 23 |
| SSH1     | 23 |
| SNX3     | 23 |
| SNX10    | 23 |
| SMC1A    | 23 |
| SLIT2    | 23 |
| SLC7A1   | 23 |
| SH3GL3   | 23 |
| SFXN1    | 23 |
| SEMA4F   | 23 |
| SARDH    | 23 |
| RYK      | 23 |
| RPS4Y1   | 23 |
| RIMS3    | 23 |
| RDX      | 23 |
| RDH11    | 23 |
| RBM23    | 23 |
| RAPGEF5  | 23 |
| RAD21    | 23 |
| RABGAP1L | 23 |
| RAB26    | 23 |
| PROS1    | 23 |
| PRCP     | 23 |
| POT1     | 23 |
| POLD2    | 23 |
| POGZ     | 23 |
| PLXDC1   | 23 |
| PLK4     | 23 |
| PLD1     | 23 |
| PHLPPL   | 23 |
| PEX16    | 23 |
| PDPN     | 23 |
| PDLIM2   | 23 |
| PDIA2    | 23 |
| PDCL     | 23 |
| PDCD2    | 23 |
| PCDH9    | 23 |

Table S3B

|          |    |
|----------|----|
| PCBP4    | 23 |
| OAS1     | 23 |
| NUDT21   | 23 |
| NUBPL    | 23 |
| NSDHL    | 23 |
| NR2C1    | 23 |
| NOV      | 23 |
| NEU1     | 23 |
| NASP     | 23 |
| MUC3B    | 23 |
| MTA1     | 23 |
| MT1M     | 23 |
| MS4A1    | 23 |
| MRP63    | 23 |
| MMP9     | 23 |
| MED12    | 23 |
| MCFD2    | 23 |
| MAN2A2   | 23 |
| MADD     | 23 |
| LRRC1    | 23 |
| KRR1     | 23 |
| KIAA1305 | 23 |
| KIAA0692 | 23 |
| JMJD3    | 23 |
| ITCH     | 23 |
| IL27RA   | 23 |
| IKBKE    | 23 |
| IGFBP4   | 23 |
| HYAL1    | 23 |
| HMG2L1   | 23 |
| GUF1     | 23 |
| GRK5     | 23 |
| GPRC5B   | 23 |
| GLIPR1   | 23 |
| GGPS1    | 23 |
| GALC     | 23 |
| FYCO1    | 23 |
| FRZB     | 23 |
| FNDC3B   | 23 |
| FBXW11   | 23 |
| FBXO3    | 23 |
| FAM86C   | 23 |
| F12      | 23 |
| EWSR1    | 23 |
| EPB41L1  | 23 |
| EPAS1    | 23 |
| ENOSF1   | 23 |
| EIF4G1   | 23 |
| EHD4     | 23 |
| EFS      | 23 |
| DSCR3    | 23 |
| DNAJC10  | 23 |
| DNAJA1   | 23 |

Table S3B

|           |    |
|-----------|----|
| DGCR8     | 23 |
| CYP2A6    | 23 |
| CXCL2     | 23 |
| CUL3      | 23 |
| CTAGE5    | 23 |
| CRHR1     | 23 |
| COL16A1   | 23 |
| COG5      | 23 |
| CNOT2     | 23 |
| CHD9      | 23 |
| CHD3      | 23 |
| CDH8      | 23 |
| CDC42EP4  | 23 |
| CDC34     | 23 |
| CAMSAP1L1 | 23 |
| CACNA1I   | 23 |
| C1QA      | 23 |
| BTG1      | 23 |
| BRWD1     | 23 |
| BCL3      | 23 |
| ATXN10    | 23 |
| ATXN1     | 23 |
| ATP9A     | 23 |
| ATP1B3    | 23 |
| ATF5      | 23 |
| ARMET     | 23 |
| ARHGEF4   | 23 |
| APOBEC3B  | 23 |
| ALDH2     | 23 |
| ALDH18A1  | 23 |
| AGPAT7    | 23 |
| AEBP1     | 23 |
| ADNP      | 23 |
| ZNF576    | 22 |
| ZNF167    | 22 |
| ZNF132    | 22 |
| ZMYM5     | 22 |
| ZFAND5    | 22 |
| ZBTB7A    | 22 |
| ZBTB16    | 22 |
| WDR79     | 22 |
| VEZT      | 22 |
| UTS2      | 22 |
| UBE2O     | 22 |
| UBE1L2    | 22 |
| TUBB2C    | 22 |
| TTC33     | 22 |
| TSTA3     | 22 |
| TSPO      | 22 |
| TSPAN8    | 22 |
| TSN       | 22 |
| TRIP13    | 22 |
| TRAPPC3   | 22 |

## Table S3B

|          |    |
|----------|----|
| TOMM70A  | 22 |
| TNFSF10  | 22 |
| TIMELESS | 22 |
| TFDP1    | 22 |
| TDG      | 22 |
| TBC1D8   | 22 |
| TARDBP   | 22 |
| TAF9B    | 22 |
| SYT1     | 22 |
| SYPL1    | 22 |
| SUPT6H   | 22 |
| STX7     | 22 |
| STAM2    | 22 |
| STAG1    | 22 |
| SRRM2    | 22 |
| SNTB2    | 22 |
| SNN      | 22 |
| SLC30A1  | 22 |
| SKIL     | 22 |
| SHQ1     | 22 |
| SH3BGRL  | 22 |
| SEMA4C   | 22 |
| SCHIP1   | 22 |
| SAMM50   | 22 |
| RRAGD    | 22 |
| RNF6     | 22 |
| RNF14    | 22 |
| RNF103   | 22 |
| RNASEH1  | 22 |
| RETSAT   | 22 |
| RCN3     | 22 |
| RCBTB2   | 22 |
| RBM3     | 22 |
| RBBP6    | 22 |
| RARRES2  | 22 |
| RANBP1   | 22 |
| RALBP1   | 22 |
| RALB     | 22 |
| RAC2     | 22 |
| PVRL1    | 22 |
| PURA     | 22 |
| PTPRA    | 22 |
| PTK2B    | 22 |
| PPP2R3A  | 22 |
| PLK2     | 22 |
| PLEK     | 22 |
| PKM2     | 22 |
| PIK3CA   | 22 |
| PIAS2    | 22 |
| PHF16    | 22 |
| PFDN5    | 22 |
| PEX19    | 22 |
| PEX1     | 22 |

Table S3B

|          |    |
|----------|----|
| PCNX     | 22 |
| PBX3     | 22 |
| PAICS    | 22 |
| OLFML1   | 22 |
| OGFR     | 22 |
| NUP210   | 22 |
| NUP188   | 22 |
| NMT2     | 22 |
| NMD3     | 22 |
| NFKBIA   | 22 |
| NEO1     | 22 |
| NCR3     | 22 |
| NAB1     | 22 |
| MYO1C    | 22 |
| MXD3     | 22 |
| MT1X     | 22 |
| MRC2     | 22 |
| MMRN2    | 22 |
| MGAT1    | 22 |
| MFAP2    | 22 |
| MAPK13   | 22 |
| MAP4K1   | 22 |
| LEPROTL1 | 22 |
| KRT17    | 22 |
| KIF2A    | 22 |
| KIAA0232 | 22 |
| KIAA0040 | 22 |
| KCNMA1   | 22 |
| KCNH2    | 22 |
| IRAK1    | 22 |
| INSIG1   | 22 |
| IL2RB    | 22 |
| IGSF3    | 22 |
| IGFBP3   | 22 |
| IGF1R    | 22 |
| HSPD1    | 22 |
| HSBP1    | 22 |
| HNF4A    | 22 |
| HMGA1    | 22 |
| HIPK2    | 22 |
| HIPK1    | 22 |
| HCFC1R1  | 22 |
| GTPBP2   | 22 |
| GOLGA5   | 22 |
| GLT25D2  | 22 |
| GJB3     | 22 |
| GIT2     | 22 |
| GAPDHS   | 22 |
| GALNT2   | 22 |
| FZD1     | 22 |
| FTSJ3    | 22 |
| FTH1     | 22 |
| FRMD4A   | 22 |

Table S3B

|         |    |
|---------|----|
| FLRT2   | 22 |
| FKBP8   | 22 |
| FCGR2C  | 22 |
| FCGR1A  | 22 |
| FBXL11  | 22 |
| FANCA   | 22 |
| FAM46A  | 22 |
| F8      | 22 |
| EVC     | 22 |
| EP400   | 22 |
| ELOVL1  | 22 |
| EI24    | 22 |
| DOK1    | 22 |
| DNAJB14 | 22 |
| DIO2    | 22 |
| DHX15   | 22 |
| DDEFL1  | 22 |
| DALRD3  | 22 |
| CSNK2A2 | 22 |
| CRYBB2  | 22 |
| COLQ    | 22 |
| COL21A1 | 22 |
| CMTM6   | 22 |
| CMAH    | 22 |
| CLEC3B  | 22 |
| CDC40   | 22 |
| CDC25B  | 22 |
| CD74    | 22 |
| CARD8   | 22 |
| BMP8A   | 22 |
| BHLHB2  | 22 |
| BCAT1   | 22 |
| ATP5G3  | 22 |
| ATF7IP2 | 22 |
| ARMCX2  | 22 |
| APTX    | 22 |
| AP1S1   | 22 |
| AKR7A2  | 22 |
| AFF2    | 22 |
| ADAM17  | 22 |
| ACTR2   | 22 |
| ACTN2   | 22 |
| ACOT9   | 22 |
| ABCB9   | 22 |
| ABCA2   | 22 |
| ZXDC    | 21 |
| ZNF589  | 21 |
| ZNF544  | 21 |
| ZNF289  | 21 |
| ZNF274  | 21 |
| ZNF217  | 21 |
| ZNF177  | 21 |
| ZGPAT   | 21 |

Table S3B

|          |    |
|----------|----|
| ZFP2     | 21 |
| ZC3HAV1  | 21 |
| WSB2     | 21 |
| WDR13    | 21 |
| WAC      | 21 |
| VIM      | 21 |
| VAMP5    | 21 |
| USP11    | 21 |
| UGCG     | 21 |
| TYMS     | 21 |
| TXNDC1   | 21 |
| TUBB3    | 21 |
| TUBB2B   | 21 |
| TRPV5    | 21 |
| TRPC1    | 21 |
| TRMT12   | 21 |
| TREM2    | 21 |
| TPM2     | 21 |
| TOR1A    | 21 |
| TNFRSF1A | 21 |
| TMEM176B | 21 |
| TMEM16K  | 21 |
| TMEM131  | 21 |
| TMEM100  | 21 |
| TKT      | 21 |
| TGFA     | 21 |
| TFEB     | 21 |
| TFAP2B   | 21 |
| SYK      | 21 |
| STX2     | 21 |
| SSX2     | 21 |
| SPHK1    | 21 |
| SPCS3    | 21 |
| SOX13    | 21 |
| SNCAIP   | 21 |
| SNAP25   | 21 |
| SMPD1    | 21 |
| SMOX     | 21 |
| SMC3     | 21 |
| SMC2     | 21 |
| SLITRK5  | 21 |
| SLC2A10  | 21 |
| SLA      | 21 |
| SKAP1    | 21 |
| SIRT5    | 21 |
| SIRT1    | 21 |
| SFRS9    | 21 |
| SFRS6    | 21 |
| SFRS2    | 21 |
| SF1      | 21 |
| SERPINB1 | 21 |
| SAV1     | 21 |
| S100A6   | 21 |



Table S3B

|         |    |
|---------|----|
| RSU1    | 21 |
| RNH1    | 21 |
| RHOH    | 21 |
| RHOBTB2 | 21 |
| RGS2    | 21 |
| RGS16   | 21 |
| RFC5    | 21 |
| RBKS    | 21 |
| RANGAP1 | 21 |
| RAB11A  | 21 |
| PTX3    | 21 |
| PTPN4   | 21 |
| PTP4A3  | 21 |
| PTP4A2  | 21 |
| PTGS1   | 21 |
| PTCH1   | 21 |
| PSMB1   | 21 |
| PRELP   | 21 |
| PPT1    | 21 |
| PPP2R5A | 21 |
| PPM1B   | 21 |
| POMP    | 21 |
| PODXL2  | 21 |
| PMAIP1  | 21 |
| PLEKHG3 | 21 |
| PLAGL2  | 21 |
| PIP5K1B | 21 |
| PHKA2   | 21 |
| PEX5    | 21 |
| PELO    | 21 |
| PEF1    | 21 |
| PDXK    | 21 |
| PDLIM1  | 21 |
| PDGFRB  | 21 |
| PDE6B   | 21 |
| PCTK1   | 21 |
| PCNXL2  | 21 |
| PCDHB6  | 21 |
| PCDH7   | 21 |
| PAWR    | 21 |
| PAPPA2  | 21 |
| PAK3    | 21 |
| PACRG   | 21 |
| ORC4L   | 21 |
| NUDT6   | 21 |
| NTS     | 21 |
| NDUFB2  | 21 |
| NARG2   | 21 |
| MYST4   | 21 |
| MYH11   | 21 |
| MXRA8   | 21 |
| MRPL2   | 21 |
| MLF1IP  | 21 |

Table S3B

|           |    |
|-----------|----|
| MGLL      | 21 |
| MGAT2     | 21 |
| MDH2      | 21 |
| MDC1      | 21 |
| MAZ       | 21 |
| MASP2     | 21 |
| LRP1      | 21 |
| LCP1      | 21 |
| LANCL1    | 21 |
| KIF2C     | 21 |
| KIAA0562  | 21 |
| KIAA0423  | 21 |
| KIAA0280  | 21 |
| KIAA0240  | 21 |
| KHDRBS1   | 21 |
| JUND      | 21 |
| JAM3      | 21 |
| ITGAV     | 21 |
| ISG20     | 21 |
| IL1RAP    | 21 |
| IL1R1     | 21 |
| IL15RA    | 21 |
| IKKBK     | 21 |
| IFNGR1    | 21 |
| IFITM1    | 21 |
| ICAM3     | 21 |
| HTATSF1   | 21 |
| HPX       | 21 |
| HOXA10    | 21 |
| HLA-DPB1  | 21 |
| HLA-DMB   | 21 |
| HIGD1A    | 21 |
| HHLA3     | 21 |
| HDAC7A    | 21 |
| H2AFX     | 21 |
| GYG2      | 21 |
| GUCY1A3   | 21 |
| GRK6      | 21 |
| GPR56     | 21 |
| GPR153    | 21 |
| GPI       | 21 |
| GLT8D2    | 21 |
| GCH1      | 21 |
| GAS1      | 21 |
| GABARAPL2 | 21 |
| FZR1      | 21 |
| FRY       | 21 |
| FOXJ3     | 21 |
| FAM89B    | 21 |
| FAM20B    | 21 |
| FAM120A   | 21 |
| F2RL1     | 21 |
| EXTL3     | 21 |

Table S3B

|         |    |
|---------|----|
| EPS8    | 21 |
| ELK3    | 21 |
| ELF4    | 21 |
| EIF2S2  | 21 |
| EFNA1   | 21 |
| ECM2    | 21 |
| ECM1    | 21 |
| E2F3    | 21 |
| DVL2    | 21 |
| DRD2    | 21 |
| DPYSL3  | 21 |
| DPY19L4 | 21 |
| DPP4    | 21 |
| DLC1    | 21 |
| DISC1   | 21 |
| DHTKD1  | 21 |
| DHPS    | 21 |
| DFNB31  | 21 |
| DDHD2   | 21 |
| DAPK1   | 21 |
| CSTF2T  | 21 |
| COQ7    | 21 |
| COBLL1  | 21 |
| CLIC3   | 21 |
| CLDN5   | 21 |
| CHRNA3  | 21 |
| CHAF1A  | 21 |
| CENTD1  | 21 |
| CDC25A  | 21 |
| CD99    | 21 |
| CD34    | 21 |
| CCR1    | 21 |
| CCL18   | 21 |
| CCDC69  | 21 |
| CASP7   | 21 |
| CASK    | 21 |
| CAPZB   | 21 |
| CAPN2   | 21 |
| BTF3    | 21 |
| BRIP1   | 21 |
| BMPR1A  | 21 |
| ATP9B   | 21 |
| ATP1B1  | 21 |
| ARVCF   | 21 |
| AKAP9   | 21 |
| AES     | 21 |
| ADAM10  | 21 |
| ACOT7   | 21 |
| ACBD4   | 21 |
| ACACA   | 21 |
| ABCG2   | 21 |
| ABCC1   | 21 |
| ZNF197  | 20 |

Table S3B

|          |    |
|----------|----|
| ZNF155   | 20 |
| ZFHX4    | 20 |
| ZC3H13   | 20 |
| ZBTB48   | 20 |
| YTHDC2   | 20 |
| XPNPEP1  | 20 |
| XBP1     | 20 |
| WNT6     | 20 |
| WDR74    | 20 |
| VPS35    | 20 |
| VEGFC    | 20 |
| USP33    | 20 |
| USP25    | 20 |
| UPF3B    | 20 |
| UNC84B   | 20 |
| TUSC3    | 20 |
| TULP4    | 20 |
| TSPAN6   | 20 |
| TSEN2    | 20 |
| TRIP4    | 20 |
| TNFAIP3  | 20 |
| TMSB10   | 20 |
| TMCC2    | 20 |
| TLK2     | 20 |
| TGM2     | 20 |
| TERF1    | 20 |
| TCOF1    | 20 |
| TCF7L1   | 20 |
| TBL2     | 20 |
| TAGLN2   | 20 |
| SRPX     | 20 |
| SRPK1    | 20 |
| SOX2     | 20 |
| SMPDL3A  | 20 |
| SMARCC2  | 20 |
| SMAD1    | 20 |
| SLCO2A1  | 20 |
| SLC25A6  | 20 |
| SLC25A44 | 20 |
| SHANK2   | 20 |
| SETD2    | 20 |
| SERPING1 | 20 |
| SCYL3    | 20 |
| SCYE1    | 20 |
| SCRN3    | 20 |
| RNPS1    | 20 |
| RND3     | 20 |
| RLF      | 20 |
| RIPK5    | 20 |
| RGS6     | 20 |
| RFC3     | 20 |
| RCC1     | 20 |
| RBBP5    | 20 |

Table S3B

|          |    |
|----------|----|
| RANBP10  | 20 |
| RAI2     | 20 |
| PVRL3    | 20 |
| PTPRM    | 20 |
| PTPRK    | 20 |
| PTGER4   | 20 |
| PTCRA    | 20 |
| PSMD9    | 20 |
| PSMD12   | 20 |
| PRNP     | 20 |
| PRKD3    | 20 |
| PRKCZ    | 20 |
| PRKCD    | 20 |
| PRKACA   | 20 |
| PPP1R3D  | 20 |
| PPP1R3C  | 20 |
| PPME1    | 20 |
| POU3F1   | 20 |
| PON2     | 20 |
| POLR3C   | 20 |
| POLR2K   | 20 |
| POLR2E   | 20 |
| PET112L  | 20 |
| PDE8A    | 20 |
| PDE4D    | 20 |
| PCLO     | 20 |
| PARP3    | 20 |
| PAIP1    | 20 |
| OSBPL2   | 20 |
| OSBPL1A  | 20 |
| OLFML2A  | 20 |
| NUTF2    | 20 |
| NPAL3    | 20 |
| NIPSNAP1 | 20 |
| NFYB     | 20 |
| NFRKB    | 20 |
| NFE2L1   | 20 |
| NBPF10   | 20 |
| NARF     | 20 |
| NAGA     | 20 |
| MYBL2    | 20 |
| MT1F     | 20 |
| MSH6     | 20 |
| MPPED2   | 20 |
| MOSC2    | 20 |
| MON1B    | 20 |
| MMP11    | 20 |
| MLF1     | 20 |
| MFNG     | 20 |
| MFN2     | 20 |
| MEGF9    | 20 |
| ME2      | 20 |
| MAST4    | 20 |

Table S3B

|          |    |
|----------|----|
| MAFB     | 20 |
| LXN      | 20 |
| LUC7L2   | 20 |
| LTK      | 20 |
| LRRC47   | 20 |
| LRP10    | 20 |
| LPIN2    | 20 |
| LAT      | 20 |
| LAIR1    | 20 |
| KRT18    | 20 |
| KLK2     | 20 |
| KIF3B    | 20 |
| KIAA1199 | 20 |
| KIAA0776 | 20 |
| KCNS3    | 20 |
| KCNK1    | 20 |
| JOSD1    | 20 |
| ITPK1    | 20 |
| ITGA4    | 20 |
| ITGA2    | 20 |
| IRF5     | 20 |
| IRF3     | 20 |
| INTS6    | 20 |
| INHBA    | 20 |
| IGHG1    | 20 |
| IGF2R    | 20 |
| IFT57    | 20 |
| IFITM2   | 20 |
| ICK      | 20 |
| HYI      | 20 |
| HTATIP2  | 20 |
| HOXD3    | 20 |
| HMGN4    | 20 |
| HMG20B   | 20 |
| HIP2     | 20 |
| HIP1R    | 20 |
| HIP1     | 20 |
| HDLBP    | 20 |
| HDDC2    | 20 |
| H2AFV    | 20 |
| GMPPB    | 20 |
| GLT25D1  | 20 |
| GGTLA1   | 20 |
| GGCX     | 20 |
| GCAT     | 20 |
| FIP1L1   | 20 |
| FAT      | 20 |
| EVI5     | 20 |
| EPM2AIP1 | 20 |
| EPHB1    | 20 |
| EMP3     | 20 |
| ELF2     | 20 |
| EHBP1    | 20 |

Table S3B

|          |    |
|----------|----|
| EFHD1    | 20 |
| ECT2     | 20 |
| ECH1     | 20 |
| DUT      | 20 |
| DUSP3    | 20 |
| DNAJB5   | 20 |
| DMD      | 20 |
| DLX4     | 20 |
| DHRS2    | 20 |
| DENR     | 20 |
| DENND4C  | 20 |
| DCAKD    | 20 |
| DBN1     | 20 |
| CXCL12   | 20 |
| CXCL10   | 20 |
| CTPS2    | 20 |
| CSK      | 20 |
| CRIP2    | 20 |
| CREB3L1  | 20 |
| COL6A3   | 20 |
| CHPT1    | 20 |
| CFI      | 20 |
| CDK2AP1  | 20 |
| CDC5L    | 20 |
| CD53     | 20 |
| CCT6A    | 20 |
| CASP9    | 20 |
| CAPNS1   | 20 |
| CAND1    | 20 |
| CALCRL   | 20 |
| BTD      | 20 |
| BMPR2    | 20 |
| BLZF1    | 20 |
| BAG2     | 20 |
| BACH2    | 20 |
| B2M      | 20 |
| AVPI1    | 20 |
| ARSA     | 20 |
| ARHGEF9  | 20 |
| ARHGAP24 | 20 |
| APOM     | 20 |
| ANXA11   | 20 |
| ANPEP    | 20 |
| ANKRD28  | 20 |
| ANKRD26  | 20 |
| ANKRD12  | 20 |
| ANGEL2   | 20 |
| ALG5     | 20 |
| ADRA1D   | 20 |
| ADIPOR1  | 20 |
| ADCY2    | 20 |
| ACP6     | 20 |
| ACBD3    | 20 |

Table S3B

|          |    |
|----------|----|
| ZNF79    | 19 |
| ZNF665   | 19 |
| ZNF573   | 19 |
| ZNF434   | 19 |
| ZNF423   | 19 |
| ZNF335   | 19 |
| ZNF330   | 19 |
| ZNF211   | 19 |
| ZMAT4    | 19 |
| ZCCHC2   | 19 |
| ZC3H14   | 19 |
| YWHAB    | 19 |
| WDR33    | 19 |
| WBP11    | 19 |
| USP46    | 19 |
| USP4     | 19 |
| USP22    | 19 |
| USP15    | 19 |
| USP1     | 19 |
| UBXD6    | 19 |
| UBE2D3   | 19 |
| TXNDC13  | 19 |
| TUBD1    | 19 |
| TST      | 19 |
| TSPAN7   | 19 |
| TRAF4    | 19 |
| TNIK     | 19 |
| TMEM176A | 19 |
| TMEM127  | 19 |
| TMED2    | 19 |
| TMED10   | 19 |
| TK2      | 19 |
| TES      | 19 |
| TCF20    | 19 |
| TAT      | 19 |
| TAF1A    | 19 |
| SURF1    | 19 |
| SUPT4H1  | 19 |
| STIP1    | 19 |
| ST3GAL6  | 19 |
| SSPN     | 19 |
| SRR      | 19 |
| SREBF2   | 19 |
| SNX2     | 19 |
| SNX19    | 19 |
| SLCO3A1  | 19 |
| SLC7A11  | 19 |
| SLC39A9  | 19 |
| SLC30A5  | 19 |
| SLC16A2  | 19 |
| SLC10A3  | 19 |
| SIX2     | 19 |
| SIRT2    | 19 |



Table S3B

|         |    |
|---------|----|
| SIM2    | 19 |
| SIL1    | 19 |
| SFRS15  | 19 |
| SFN     | 19 |
| SERINC1 | 19 |
| SEPP1   | 19 |
| SEL1L   | 19 |
| SEC22A  | 19 |
| SDHB    | 19 |
| SAP30   | 19 |
| SAFB    | 19 |
| RXRA    | 19 |
| RRM2    | 19 |
| RPL41   | 19 |
| RPL36   | 19 |
| RPH3AL  | 19 |
| ROCK1   | 19 |
| RNF11   | 19 |
| RHO     | 19 |
| RFX3    | 19 |
| RECQL5  | 19 |
| RBMX2   | 19 |
| RBM34   | 19 |
| RASL12  | 19 |
| RASGRP3 | 19 |
| RAB14   | 19 |
| PTPRE   | 19 |
| PTPN2   | 19 |
| PTPN18  | 19 |
| PTGDS   | 19 |
| PSMD11  | 19 |
| PRR7    | 19 |
| PRKCSH  | 19 |
| PPP2R1A | 19 |
| PPBPL2  | 19 |
| POU2F1  | 19 |
| POLQ    | 19 |
| PMM2    | 19 |
| PLSCR3  | 19 |
| PLEKHF2 | 19 |
| PLCB1   | 19 |
| PLAT    | 19 |
| PJA2    | 19 |
| PIN4    | 19 |
| PHLDA3  | 19 |
| PHF2    | 19 |
| PER2    | 19 |
| PER1    | 19 |
| PDE4B   | 19 |
| PDE2A   | 19 |
| PCYOX1  | 19 |
| PCDHGA3 | 19 |
| PCCA    | 19 |

Table S3B

|          |    |
|----------|----|
| P4HB     | 19 |
| OXR1     | 19 |
| OSBPL8   | 19 |
| ORMDL2   | 19 |
| OLFML3   | 19 |
| NUP98    | 19 |
| NUP54    | 19 |
| NUCB1    | 19 |
| NSUN5B   | 19 |
| NRL      | 19 |
| NR6A1    | 19 |
| NR4A3    | 19 |
| NPY5R    | 19 |
| NPTN     | 19 |
| NPEPL1   | 19 |
| NFASC    | 19 |
| NET1     | 19 |
| NENF     | 19 |
| NDUFB8   | 19 |
| NAGK     | 19 |
| MYCBP2   | 19 |
| MXD4     | 19 |
| MRPL15   | 19 |
| MPP2     | 19 |
| MORC2    | 19 |
| MOCS2    | 19 |
| MFHAS1   | 19 |
| MEIS2    | 19 |
| MEGF8    | 19 |
| MBTPS1   | 19 |
| MBD5     | 19 |
| MASP1    | 19 |
| MARK2    | 19 |
| MAPRE3   | 19 |
| MANSC1   | 19 |
| MANEA    | 19 |
| MAN2B2   | 19 |
| MAN1B1   | 19 |
| MAN1A2   | 19 |
| MAGED2   | 19 |
| M6PRBP1  | 19 |
| LTBP2    | 19 |
| LRRC23   | 19 |
| LMO4     | 19 |
| LEPREL1  | 19 |
| LCP2     | 19 |
| LBR      | 19 |
| KPNA3    | 19 |
| KLHL7    | 19 |
| KIAA1609 | 19 |
| KIAA0974 | 19 |
| KIAA0513 | 19 |
| KCND1    | 19 |

Table S3B

|          |    |
|----------|----|
| ISL1     | 19 |
| IFI44    | 19 |
| ICOSLG   | 19 |
| HOXD13   | 19 |
| HOXB5    | 19 |
| HK2      | 19 |
| HIBCH    | 19 |
| HDAC4    | 19 |
| HBP1     | 19 |
| H6PD     | 19 |
| GTPBP1   | 19 |
| GTF3C2   | 19 |
| GSPT1    | 19 |
| GSK3A    | 19 |
| GRK4     | 19 |
| GPX5     | 19 |
| GPR124   | 19 |
| GP9      | 19 |
| GORASP2  | 19 |
| GORASP1  | 19 |
| GOLPH3L  | 19 |
| GNG4     | 19 |
| GIN5A    | 19 |
| GFOD2    | 19 |
| GABBR2   | 19 |
| GAB2     | 19 |
| FXYD5    | 19 |
| FTO      | 19 |
| FSTL1    | 19 |
| FBXO17   | 19 |
| FBXL5    | 19 |
| FASTKD2  | 19 |
| FAM3C    | 19 |
| EIF2B1   | 19 |
| EGR2     | 19 |
| EDN2     | 19 |
| ECHDC3   | 19 |
| DYSF     | 19 |
| DYRK1A   | 19 |
| DYNC1LI2 | 19 |
| DLG5     | 19 |
| DIRAS3   | 19 |
| DGCR2    | 19 |
| DCX      | 19 |
| DCLRE1C  | 19 |
| DCHS1    | 19 |
| CXCR7    | 19 |
| CRTC1    | 19 |
| COX7C    | 19 |
| COPZ2    | 19 |
| COPS8    | 19 |
| COL10A1  | 19 |
| CNOT8    | 19 |

Table S3B

|          |    |
|----------|----|
| CHRD1    | 19 |
| CHIC2    | 19 |
| CEP76    | 19 |
| CDS2     | 19 |
| CDK7     | 19 |
| CDC42EP2 | 19 |
| CDC2L6   | 19 |
| CDC25C   | 19 |
| CCNT2    | 19 |
| CCNI     | 19 |
| CCNF     | 19 |
| CCNA2    | 19 |
| CCDC71   | 19 |
| CCDC48   | 19 |
| CBX4     | 19 |
| CAMTA2   | 19 |
| CALM3    | 19 |
| CACNB3   | 19 |
| BUB1B    | 19 |
| BTG2     | 19 |
| BRCA1    | 19 |
| BCL2L13  | 19 |
| B4GALT1  | 19 |
| AVIL     | 19 |
| ASIP     | 19 |
| ARAF     | 19 |
| AP3S1    | 19 |
| AMPD1    | 19 |
| ALAS2    | 19 |
| AKAP7    | 19 |
| AK5      | 19 |
| AFF1     | 19 |
| ADSL     | 19 |
| ADH5     | 19 |
| ADAMDEC1 | 19 |
| ACVR1B   | 19 |
| ACP1     | 19 |
| ACCN1    | 19 |
| ABL1     | 19 |
| ABHD5    | 19 |
| AASDHPPT | 19 |
| ZNF672   | 18 |
| ZNF43    | 18 |
| ZNF384   | 18 |
| ZNF281   | 18 |
| ZNF232   | 18 |
| ZNF193   | 18 |
| ZNF134   | 18 |
| ZKSCAN1  | 18 |
| ZIC3     | 18 |
| ZFX      | 18 |
| ZC3H7B   | 18 |
| ZC3H3    | 18 |

Table S3B

|          |    |
|----------|----|
| ZBTB24   | 18 |
| YKT6     | 18 |
| WDR62    | 18 |
| WBP2     | 18 |
| VPS13A   | 18 |
| USF2     | 18 |
| UGCGL1   | 18 |
| TYROBP   | 18 |
| TYRO3    | 18 |
| TXNDC9   | 18 |
| TXNDC5   | 18 |
| TWSG1    | 18 |
| TUBGCP5  | 18 |
| TSPY1    | 18 |
| TSNAXIP1 | 18 |
| TSC22D1  | 18 |
| TRIM68   | 18 |
| TRIM29   | 18 |
| TRIM14   | 18 |
| TRAPPC6A | 18 |
| TRAP1    | 18 |
| TPP1     | 18 |
| TPMT     | 18 |
| TP53     | 18 |
| TNK1     | 18 |
| TNFRSF25 | 18 |
| TMOD3    | 18 |
| TMEM63A  | 18 |
| TMEM41B  | 18 |
| TMEM123  | 18 |
| TLL2     | 18 |
| TIMM17A  | 18 |
| TIE1     | 18 |
| TDRKH    | 18 |
| TCFL5    | 18 |
| TCEAL4   | 18 |
| TBC1D15  | 18 |
| SULT4A1  | 18 |
| STXBP6   | 18 |
| STMN1    | 18 |
| STK10    | 18 |
| STAU2    | 18 |
| ST6GAL1  | 18 |
| SSB      | 18 |
| SPEN     | 18 |
| SPDEF    | 18 |
| SPCS2    | 18 |
| SPARCL1  | 18 |
| SPAG5    | 18 |
| SNW1     | 18 |
| SLC7A7   | 18 |
| SLC4A4   | 18 |
| SLC43A3  | 18 |

Table S3B

|          |    |
|----------|----|
| SLC39A14 | 18 |
| SLC25A37 | 18 |
| SLC22A4  | 18 |
| SLC22A17 | 18 |
| SIN3B    | 18 |
| SH3TC1   | 18 |
| SGCB     | 18 |
| SFTPB    | 18 |
| SF3A2    | 18 |
| SETMAR   | 18 |
| SESN1    | 18 |
| SDCBP    | 18 |
| SCYL2    | 18 |
| SCLY     | 18 |
| SCAMP2   | 18 |
| SBF1     | 18 |
| SATB1    | 18 |
| S100A10  | 18 |
| RWDD3    | 18 |
| RRAS     | 18 |
| RPS6KA5  | 18 |
| RPL5     | 18 |
| RPL37    | 18 |
| RNF8     | 18 |
| RNF139   | 18 |
| RHOT2    | 18 |
| RHOC     | 18 |
| REPIN1   | 18 |
| RBM13    | 18 |
| RASL11B  | 18 |
| RASAL1   | 18 |
| RARRES1  | 18 |
| RAI14    | 18 |
| RAE1     | 18 |
| RAD51C   | 18 |
| RAD51AP1 | 18 |
| RABIF    | 18 |
| RABEP1   | 18 |
| RAB40B   | 18 |
| RAB22A   | 18 |
| RAB21    | 18 |
| RAB20    | 18 |
| QDPR     | 18 |
| PYHIN1   | 18 |
| PTPN7    | 18 |
| PTGIS    | 18 |
| PTBP2    | 18 |
| PSCD3    | 18 |
| PRKD1    | 18 |
| PRKCB1   | 18 |
| PPP4C    | 18 |
| POLR1D   | 18 |
| POLG2    | 18 |

Table S3B

|          |    |
|----------|----|
| PLVAP    | 18 |
| PLGLA1   | 18 |
| PLEKHQ1  | 18 |
| PLCB4    | 18 |
| PLA2G4B  | 18 |
| PKN1     | 18 |
| PIWIL2   | 18 |
| PIGP     | 18 |
| PHF20L1  | 18 |
| PFTK1    | 18 |
| PFKFB3   | 18 |
| PEX7     | 18 |
| PEX14    | 18 |
| PDZD3    | 18 |
| PDE9A    | 18 |
| PDCD10   | 18 |
| PCP4     | 18 |
| PAPPA    | 18 |
| OSGEPL1  | 18 |
| OGN      | 18 |
| OGG1     | 18 |
| NUP88    | 18 |
| NUCKS1   | 18 |
| NR1I2    | 18 |
| NPFF     | 18 |
| NPC2     | 18 |
| NLGN4X   | 18 |
| NKX3-1   | 18 |
| NGFRAP1  | 18 |
| NFE2L2   | 18 |
| NAPG     | 18 |
| NAGLU    | 18 |
| MYO15B   | 18 |
| MYH2     | 18 |
| MVK      | 18 |
| MTFR1    | 18 |
| MTF2     | 18 |
| MS4A6A   | 18 |
| MRPS30   | 18 |
| MNAT1    | 18 |
| MLXIP    | 18 |
| MGAT5    | 18 |
| MERTK    | 18 |
| MEOX2    | 18 |
| MEF2D    | 18 |
| MCM7     | 18 |
| MAPKAPK2 | 18 |
| MAP3K4   | 18 |
| MAP3K12  | 18 |
| MAP2K4   | 18 |
| MAK10    | 18 |
| LZTS1    | 18 |
| LY86     | 18 |

Table S3B

|           |    |
|-----------|----|
| LSG1      | 18 |
| LRRC17    | 18 |
| LRCH4     | 18 |
| LITAF     | 18 |
| LIMK1     | 18 |
| LDLRAP1   | 18 |
| LARP4     | 18 |
| LAMA5     | 18 |
| KRT35     | 18 |
| KLK13     | 18 |
| KLHL21    | 18 |
| KLF4      | 18 |
| KIAA1598  | 18 |
| KIAA0174  | 18 |
| KIAA0141  | 18 |
| KIAA0100  | 18 |
| KBTBD10   | 18 |
| JAK1      | 18 |
| ITPR3     | 18 |
| ITPR1     | 18 |
| ITGAM     | 18 |
| ITFG1     | 18 |
| IER5      | 18 |
| HSF2      | 18 |
| HRASLS    | 18 |
| HOXD4     | 18 |
| HK1       | 18 |
| HIST1H2AC | 18 |
| HIF1AN    | 18 |
| HDAC6     | 18 |
| HADH      | 18 |
| GTF3A     | 18 |
| GSTM1     | 18 |
| GRLF1     | 18 |
| GNG12     | 18 |
| GLB1      | 18 |
| GHR       | 18 |
| GBP2      | 18 |
| GABBR1    | 18 |
| FXD6      | 18 |
| FUBP1     | 18 |
| FOXO1     | 18 |
| FEZ1      | 18 |
| FCGR2A    | 18 |
| FBXO9     | 18 |
| FAM38B    | 18 |
| FAHD2A    | 18 |
| ETHE1     | 18 |
| ERP29     | 18 |
| ERF       | 18 |
| EPHB3     | 18 |
| EIF4E     | 18 |
| EDEM1     | 18 |



Table S3B

|          |    |
|----------|----|
| E2F8     | 18 |
| DUSP11   | 18 |
| DTX4     | 18 |
| DTL      | 18 |
| DOCK4    | 18 |
| DNMT1    | 18 |
| DND1     | 18 |
| DNAJC9   | 18 |
| DDX27    | 18 |
| DDX25    | 18 |
| DDOST    | 18 |
| DARS2    | 18 |
| DAK      | 18 |
| CTSO     | 18 |
| CSTF1    | 18 |
| CSNK1G3  | 18 |
| CRIM1    | 18 |
| CORO2A   | 18 |
| CORO1A   | 18 |
| COPS5    | 18 |
| COMT     | 18 |
| COL8A2   | 18 |
| CNOT3    | 18 |
| CLEC11A  | 18 |
| CLDN10   | 18 |
| CHMP2A   | 18 |
| CETN2    | 18 |
| CERK     | 18 |
| CEP290   | 18 |
| CEBPD    | 18 |
| CDKN2B   | 18 |
| CDC6     | 18 |
| CDC2     | 18 |
| CD97     | 18 |
| CD82     | 18 |
| CD3D     | 18 |
| CCT2     | 18 |
| CCNJL    | 18 |
| CASP6    | 18 |
| CAMK2N1  | 18 |
| CALCOCO1 | 18 |
| C1QBP    | 18 |
| BTN3A3   | 18 |
| BTBD14B  | 18 |
| BMP2K    | 18 |
| BLM      | 18 |
| BDH1     | 18 |
| BCL7A    | 18 |
| BCKDHB   | 18 |
| BCAS3    | 18 |
| BAIAP2   | 18 |
| BAG3     | 18 |
| BACE1    | 18 |

Table S3B

|           |    |
|-----------|----|
| AXIN1     | 18 |
| AUH       | 18 |
| ATXN7     | 18 |
| ATP5E     | 18 |
| ASPM      | 18 |
| ASAH1     | 18 |
| ARSE      | 18 |
| ARRB2     | 18 |
| ARHGEF11  | 18 |
| ARHGEF10L | 18 |
| ARFIP2    | 18 |
| APOL1     | 18 |
| APBA3     | 18 |
| ANKRD15   | 18 |
| AMT       | 18 |
| AMPD2     | 18 |
| ALCAM     | 18 |
| AKR1C2    | 18 |
| ADCY7     | 18 |
| ADAT1     | 18 |
| ACOX3     | 18 |
| ACOT11    | 18 |
| ABCE1     | 18 |
| ABCC3     | 18 |
| AAK1      | 18 |
| ZZEF1     | 17 |
| ZWINT     | 17 |
| ZNF350    | 17 |
| ZNF266    | 17 |
| ZNF146    | 17 |
| ZFP37     | 17 |
| ZCCHC4    | 17 |
| ZBED1     | 17 |
| YIPF4     | 17 |
| YIPF1     | 17 |
| YBX1      | 17 |
| XPNPEP2   | 17 |
| WFDC1     | 17 |
| WDR5B     | 17 |
| VASP      | 17 |
| VAPB      | 17 |
| UNC45A    | 17 |
| UCHL1     | 17 |
| UBE2G2    | 17 |
| TUBB6     | 17 |
| TSPYL1    | 17 |
| TRRAP     | 17 |
| TRPS1     | 17 |
| TRPM3     | 17 |
| TRIM24    | 17 |
| TRAF3     | 17 |
| TPBG      | 17 |
| TOMM20    | 17 |

Table S3B

|          |    |
|----------|----|
| TNK2     | 17 |
| TNFAIP8  | 17 |
| TMEM33   | 17 |
| TMEM2    | 17 |
| TMEM106C | 17 |
| TM7SF3   | 17 |
| TLR5     | 17 |
| TIAL1    | 17 |
| TGFB1I1  | 17 |
| TENC1    | 17 |
| TBC1D9   | 17 |
| TBC1D5   | 17 |
| TAGLN    | 17 |
| SYNJ1    | 17 |
| SUMO3    | 17 |
| ST3GAL2  | 17 |
| SPAG16   | 17 |
| SOX10    | 17 |
| SORBS2   | 17 |
| SON      | 17 |
| SNRP70   | 17 |
| SMURF2   | 17 |
| SLC38A3  | 17 |
| SLC22A18 | 17 |
| SLC19A2  | 17 |
| SHOX2    | 17 |
| SETD3    | 17 |
| SERPINB2 | 17 |
| SEMA4A   | 17 |
| SCRN1    | 17 |
| SCPEP1   | 17 |
| SCAMP3   | 17 |
| SBNO1    | 17 |
| S100PBP  | 17 |
| RSRC1    | 17 |
| RPP38    | 17 |
| RNMTL1   | 17 |
| RNF122   | 17 |
| RIMS1    | 17 |
| RIMBP2   | 17 |
| RHBDD3   | 17 |
| RFC2     | 17 |
| RCHY1    | 17 |
| RBP4     | 17 |
| RBM7     | 17 |
| RBM19    | 17 |
| RAB4A    | 17 |
| QTRT1    | 17 |
| PXDN     | 17 |
| PTGES    | 17 |
| PSG3     | 17 |
| PSAP     | 17 |
| PRX      | 17 |

Table S3B

|         |    |
|---------|----|
| PRODH   | 17 |
| PRC1    | 17 |
| PQLC3   | 17 |
| PPP5C   | 17 |
| PPP1R7  | 17 |
| PPIA    | 17 |
| POP1    | 17 |
| PNMA2   | 17 |
| PLCL2   | 17 |
| PLCG2   | 17 |
| PITPNC1 | 17 |
| PILRA   | 17 |
| PIK3R4  | 17 |
| PHF15   | 17 |
| PEX12   | 17 |
| PDHB    | 17 |
| PDE1A   | 17 |
| PDCD6IP | 17 |
| PCDH12  | 17 |
| PCBD1   | 17 |
| P2RX4   | 17 |
| OVGP1   | 17 |
| OSTM1   | 17 |
| OPRS1   | 17 |
| NUP43   | 17 |
| NUP107  | 17 |
| NSUN5   | 17 |
| NRBP1   | 17 |
| NRBF2   | 17 |
| NR2F6   | 17 |
| NPR1    | 17 |
| NP      | 17 |
| NOS1AP  | 17 |
| NONO    | 17 |
| NMT1    | 17 |
| NME5    | 17 |
| NLE1    | 17 |
| NINJ2   | 17 |
| NEIL3   | 17 |
| NDUFA6  | 17 |
| NDST2   | 17 |
| NCKAP1L | 17 |
| NCAM2   | 17 |
| MYO9B   | 17 |
| MYO5C   | 17 |
| MYLIP   | 17 |
| MUC7    | 17 |
| MTRF1   | 17 |
| MT1G    | 17 |
| MSN     | 17 |
| MRPL13  | 17 |
| MPDU1   | 17 |
| MEA1    | 17 |

Table S3B

|          |    |
|----------|----|
| MDFIC    | 17 |
| MAPKAPK3 | 17 |
| MAPK8    | 17 |
| MAP3K6   | 17 |
| MAN2A1   | 17 |
| MALT1    | 17 |
| LSM4     | 17 |
| LSM1     | 17 |
| LRRC15   | 17 |
| LEMD3    | 17 |
| LCAT     | 17 |
| LAMB2    | 17 |
| LAMB1    | 17 |
| KLK3     | 17 |
| KLF11    | 17 |
| KIAA0355 | 17 |
| KIAA0247 | 17 |
| KCTD5    | 17 |
| KCNJ2    | 17 |
| ITM2C    | 17 |
| ITIH4    | 17 |
| ITGAX    | 17 |
| ITGA7    | 17 |
| IRF4     | 17 |
| INTS8    | 17 |
| ING2     | 17 |
| IL17B    | 17 |
| IFT20    | 17 |
| IFNA10   | 17 |
| IER2     | 17 |
| HTR3A    | 17 |
| HSPE1    | 17 |
| HSP90AB1 | 17 |
| HSD17B8  | 17 |
| HS2ST1   | 17 |
| HPCAL4   | 17 |
| HOXD9    | 17 |
| HMGN3    | 17 |
| HLA-DMA  | 17 |
| HLA-A    | 17 |
| HIC2     | 17 |
| HES1     | 17 |
| HERC1    | 17 |
| HCK      | 17 |
| H2BFS    | 17 |
| H2AFZ    | 17 |
| GUCY1B3  | 17 |
| GSTO1    | 17 |
| GRPEL1   | 17 |
| GRIK5    | 17 |
| GPR4     | 17 |
| GOLGA8A  | 17 |
| GNE      | 17 |

Table S3B

|         |    |
|---------|----|
| GLT8D1  | 17 |
| GLS2    | 17 |
| GLI3    | 17 |
| GGA3    | 17 |
| GCNT2   | 17 |
| GBP1    | 17 |
| GABARAP | 17 |
| G6PC3   | 17 |
| FNBP1L  | 17 |
| FNBP1   | 17 |
| FER     | 17 |
| FEN1    | 17 |
| FEM1C   | 17 |
| FCMD    | 17 |
| FCER1G  | 17 |
| FAT4    | 17 |
| FASLG   | 17 |
| FAM98A  | 17 |
| FAM62A  | 17 |
| FAM49A  | 17 |
| FAM107A | 17 |
| FAIM    | 17 |
| FADS3   | 17 |
| EPHX2   | 17 |
| EPHA3   | 17 |
| EMCN    | 17 |
| ELTD1   | 17 |
| EIF2B5  | 17 |
| EHBP1L1 | 17 |
| EDG7    | 17 |
| DPH5    | 17 |
| DOCK9   | 17 |
| DNAJC17 | 17 |
| DMWD    | 17 |
| DLG4    | 17 |
| DLEC1   | 17 |
| DKK2    | 17 |
| DIAPH1  | 17 |
| DHRS4   | 17 |
| DDX49   | 17 |
| DDX24   | 17 |
| DDT     | 17 |
| DDB2    | 17 |
| DBF4    | 17 |
| DAAM2   | 17 |
| CYR61   | 17 |
| CYP19A1 | 17 |
| CXADR   | 17 |
| CUL4A   | 17 |
| CTSK    | 17 |
| CTSF    | 17 |
| CTNNAL1 | 17 |
| CSF2    | 17 |

Table S3B

|          |    |
|----------|----|
| CRISP1   | 17 |
| CRELD1   | 17 |
| CPZ      | 17 |
| CMPK     | 17 |
| CLSTN2   | 17 |
| CLPTM1   | 17 |
| CKAP2    | 17 |
| CIAPIN1  | 17 |
| CHFR     | 17 |
| CEP170   | 17 |
| CDKN2C   | 17 |
| CDKN1B   | 17 |
| CDK5R1   | 17 |
| CDH15    | 17 |
| CDC7     | 17 |
| CD83     | 17 |
| CD4      | 17 |
| CCNB2    | 17 |
| CCHCR1   | 17 |
| CCDC47   | 17 |
| CBX8     | 17 |
| CBX1     | 17 |
| CBLL1    | 17 |
| CBFB     | 17 |
| CASP2    | 17 |
| CARHSP1  | 17 |
| CAPN7    | 17 |
| CAPN6    | 17 |
| CACNA2D2 | 17 |
| C1S      | 17 |
| BTN3A2   | 17 |
| BTN2A2   | 17 |
| BTK      | 17 |
| BRD4     | 17 |
| BRCA2    | 17 |
| BOLA1    | 17 |
| BMPER    | 17 |
| BMP4     | 17 |
| BMP2     | 17 |
| BLK      | 17 |
| BHLHB3   | 17 |
| BCCIP    | 17 |
| BCAT2    | 17 |
| BAZ1A    | 17 |
| BAHCC1   | 17 |
| BACE2    | 17 |
| B3GNTL1  | 17 |
| B3GALNT1 | 17 |
| ATP8A1   | 17 |
| ATP6V1E1 | 17 |
| ATP10D   | 17 |
| ASTN2    | 17 |
| ASRGL1   | 17 |

Table S3B

|          |    |
|----------|----|
| ASCC3    | 17 |
| ARSB     | 17 |
| ARMCX5   | 17 |
| ARL2BP   | 17 |
| ARHGAP28 | 17 |
| ARC      | 17 |
| AOX1     | 17 |
| ANP32B   | 17 |
| ANKRD27  | 17 |
| ANKRD25  | 17 |
| ANKRD17  | 17 |
| AMOTL2   | 17 |
| ALPL     | 17 |
| ALDH4A1  | 17 |
| ALDH3B1  | 17 |
| ALDH1L1  | 17 |
| AIP      | 17 |
| ADIPOR2  | 17 |
| ACYP2    | 17 |
| ACTR1A   | 17 |
| ACTN4    | 17 |
| ACOX2    | 17 |
| ACAA1    | 17 |
| ZNF76    | 16 |
| ZNF506   | 16 |
| ZNF430   | 16 |
| ZNF410   | 16 |
| ZNF282   | 16 |
| ZNF26    | 16 |
| ZNF135   | 16 |
| ZNF124   | 16 |
| ZFYVE9   | 16 |
| ZCCHC14  | 16 |
| YARS2    | 16 |
| WHSC2    | 16 |
| WFS1     | 16 |
| WDR78    | 16 |
| WARS     | 16 |
| VWF      | 16 |
| VRK1     | 16 |
| VPS8     | 16 |
| VPS41    | 16 |
| VPS39    | 16 |
| VAV2     | 16 |
| VARS     | 16 |
| UTP6     | 16 |
| USP6     | 16 |
| USP48    | 16 |
| USP12    | 16 |
| UQCRC2   | 16 |
| UPF1     | 16 |
| UBXD8    | 16 |
| UBAP2    | 16 |



Table S3B

|         |    |
|---------|----|
| TXNRD2  | 16 |
| TUBG2   | 16 |
| TTRAP   | 16 |
| TTLL1   | 16 |
| TSPYL4  | 16 |
| TRMT1   | 16 |
| TRIOBP  | 16 |
| TRIM8   | 16 |
| TRIM66  | 16 |
| TRIB3   | 16 |
| TPST2   | 16 |
| TPCN1   | 16 |
| TNIP1   | 16 |
| TNFAIP6 | 16 |
| TMEM92  | 16 |
| TMEM59  | 16 |
| TMEM109 | 16 |
| TM2D3   | 16 |
| TH1L    | 16 |
| TGFB3   | 16 |
| TGDS    | 16 |
| TFAP4   | 16 |
| TESK2   | 16 |
| TCF7    | 16 |
| TCERG1  | 16 |
| TBX5    | 16 |
| TAZ     | 16 |
| TARBP2  | 16 |
| TAF4    | 16 |
| TAF12   | 16 |
| SYNGR2  | 16 |
| SYCP1   | 16 |
| SUOX    | 16 |
| SULT1A2 | 16 |
| SUHW4   | 16 |
| STAT5B  | 16 |
| STAP2   | 16 |
| STAC    | 16 |
| SSTR2   | 16 |
| SSFA2   | 16 |
| SSBP1   | 16 |
| SRBD1   | 16 |
| SPR     | 16 |
| SOD1    | 16 |
| SNX11   | 16 |
| SNRPB2  | 16 |
| SNAPC1  | 16 |
| SNAI2   | 16 |
| SMYD5   | 16 |
| SMARCE1 | 16 |
| SMAD2   | 16 |
| SLC6A15 | 16 |
| SLC28A2 | 16 |

Table S3B

|          |    |
|----------|----|
| SLC27A3  | 16 |
| SLC24A6  | 16 |
| SLC1A5   | 16 |
| SLC17A7  | 16 |
| SLC16A4  | 16 |
| SGK      | 16 |
| SFRP4    | 16 |
| SETBP1   | 16 |
| SERPINE1 | 16 |
| SCG2     | 16 |
| SCFD1    | 16 |
| SAR1B    | 16 |
| SAPS3    | 16 |
| RUFY1    | 16 |
| RPS9     | 16 |
| RPP21    | 16 |
| RPL4     | 16 |
| RPL13A   | 16 |
| RPL13    | 16 |
| ROR1     | 16 |
| ROCK2    | 16 |
| ROBO3    | 16 |
| RNF7     | 16 |
| RNF123   | 16 |
| RHAG     | 16 |
| RGS1     | 16 |
| RET      | 16 |
| RBM38    | 16 |
| RBM16    | 16 |
| RASSF7   | 16 |
| RASGRF1  | 16 |
| RANBP2   | 16 |
| RABGGTA  | 16 |
| RAB27A   | 16 |
| QTRTD1   | 16 |
| PTTG1IP  | 16 |
| PTPLAD1  | 16 |
| PTPLA    | 16 |
| PTMA     | 16 |
| PSMD7    | 16 |
| PSMA2    | 16 |
| PSCD1    | 16 |
| PRR11    | 16 |
| PROX1    | 16 |
| PRMT5    | 16 |
| PRKCQ    | 16 |
| PRG2     | 16 |
| PRDM10   | 16 |
| PQLC1    | 16 |
| PPP2R2B  | 16 |
| PPAT     | 16 |
| POU2F2   | 16 |
| POLS     | 16 |

Table S3B

|         |    |
|---------|----|
| POLL    | 16 |
| PLSCR4  | 16 |
| PLEKHJ1 | 16 |
| PLA2G4C | 16 |
| PITRM1  | 16 |
| PIP5K1C | 16 |
| PIK3C3  | 16 |
| PIGT    | 16 |
| PHTF2   | 16 |
| PHLDA2  | 16 |
| PFDN2   | 16 |
| PCMTD2  | 16 |
| PCDHB11 | 16 |
| OTUD3   | 16 |
| NSUN3   | 16 |
| NPTXR   | 16 |
| NME4    | 16 |
| NIT1    | 16 |
| NCDN    | 16 |
| NCAPH2  | 16 |
| NAV2    | 16 |
| NARS    | 16 |
| NADSYN1 | 16 |
| MYST1   | 16 |
| MYO1A   | 16 |
| MYL9    | 16 |
| MYL1    | 16 |
| MTO1    | 16 |
| MTIF2   | 16 |
| MSRB2   | 16 |
| MSL2L1  | 16 |
| MRPS14  | 16 |
| MRPL49  | 16 |
| MN1     | 16 |
| MMP24   | 16 |
| MLYCD   | 16 |
| MLC1    | 16 |
| MKKS    | 16 |
| MARK4   | 16 |
| MAP9    | 16 |
| MAP3K8  | 16 |
| MAN1A1  | 16 |
| MAEA    | 16 |
| MAD1L1  | 16 |
| LY6H    | 16 |
| LTBP3   | 16 |
| LRRC37A | 16 |
| LRBA    | 16 |
| LPXN    | 16 |
| LPGAT1  | 16 |
| LMAN1   | 16 |
| LIMD1   | 16 |
| LIG4    | 16 |

Table S3B

|          |    |
|----------|----|
| LGR4     | 16 |
| LGALS1   | 16 |
| LAT2     | 16 |
| LARP7    | 16 |
| KPNA4    | 16 |
| KLHL2    | 16 |
| KLHL18   | 16 |
| KIR3DL2  | 16 |
| KIAA1641 | 16 |
| KIAA0922 | 16 |
| KIAA0831 | 16 |
| KIAA0323 | 16 |
| KIAA0241 | 16 |
| KHSRP    | 16 |
| KDR      | 16 |
| KCNN3    | 16 |
| KCNMB4   | 16 |
| JRKL     | 16 |
| ITGA5    | 16 |
| IQSEC1   | 16 |
| IQGAP2   | 16 |
| IL5RA    | 16 |
| IL21R    | 16 |
| IL1RN    | 16 |
| IGFBP6   | 16 |
| IGBP1    | 16 |
| IFT81    | 16 |
| IFI6     | 16 |
| IFI27    | 16 |
| IBTK     | 16 |
| HYAL2    | 16 |
| HSD17B4  | 16 |
| HR       | 16 |
| HOXA7    | 16 |
| HOMER1   | 16 |
| HEY2     | 16 |
| HCLS1    | 16 |
| HCCS     | 16 |
| H3F3B    | 16 |
| GRAMD3   | 16 |
| GPR45    | 16 |
| GPR23    | 16 |
| GPLD1    | 16 |
| GPKOW    | 16 |
| GPD1L    | 16 |
| GNG5     | 16 |
| GNAQ     | 16 |
| GMPR2    | 16 |
| GMCL1    | 16 |
| GIPC1    | 16 |
| GIMAP6   | 16 |
| GFRA2    | 16 |
| GFOD1    | 16 |

Table S3B

|          |    |
|----------|----|
| GATA3    | 16 |
| GAD2     | 16 |
| FZD7     | 16 |
| FZD4     | 16 |
| FUZ      | 16 |
| FUT8     | 16 |
| FUT6     | 16 |
| FNTA     | 16 |
| FNDC4    | 16 |
| FLAD1    | 16 |
| FKBP14   | 16 |
| FGL1     | 16 |
| FECH     | 16 |
| FDX1     | 16 |
| FBXO5    | 16 |
| FBXO42   | 16 |
| FBXL4    | 16 |
| FBXL18   | 16 |
| FBLN2    | 16 |
| FAM60A   | 16 |
| FAM5B    | 16 |
| FAM53C   | 16 |
| FAM3A    | 16 |
| FAM35A   | 16 |
| FAM18B   | 16 |
| FAM119B  | 16 |
| FAM102A  | 16 |
| FAIM2    | 16 |
| FAH      | 16 |
| EYA2     | 16 |
| EXTL2    | 16 |
| EXOD1    | 16 |
| ETNK2    | 16 |
| ETNK1    | 16 |
| ESR2     | 16 |
| EPHX1    | 16 |
| EPB49    | 16 |
| ENTPD7   | 16 |
| ENTPD4   | 16 |
| EMG1     | 16 |
| ELL2     | 16 |
| ELF1     | 16 |
| ELAVL1   | 16 |
| EIF4EBP1 | 16 |
| EIF2C4   | 16 |
| EGFL6    | 16 |
| EFNB2    | 16 |
| EDC4     | 16 |
| E2F4     | 16 |
| E2F1     | 16 |
| DYNLT3   | 16 |
| DUSP22   | 16 |
| DUSP1    | 16 |

Table S3B

|          |    |
|----------|----|
| DTNA     | 16 |
| DOCK2    | 16 |
| DNAJC7   | 16 |
| DMXL2    | 16 |
| DMXL1    | 16 |
| DLL3     | 16 |
| DLG7     | 16 |
| DHX38    | 16 |
| DHCR7    | 16 |
| DEGS1    | 16 |
| DDX23    | 16 |
| DBP      | 16 |
| DAPK3    | 16 |
| CYP51A1  | 16 |
| CYP46A1  | 16 |
| CTSZ     | 16 |
| CTSL2    | 16 |
| CTGF     | 16 |
| CST3     | 16 |
| CSPG5    | 16 |
| CSF1R    | 16 |
| CREM     | 16 |
| CREBL1   | 16 |
| CPSF3L   | 16 |
| CPM      | 16 |
| COX7A1   | 16 |
| COX4NB   | 16 |
| COL7A1   | 16 |
| COL2A1   | 16 |
| CLSTN3   | 16 |
| CLIC4    | 16 |
| CLCN4    | 16 |
| CLASP1   | 16 |
| CIC      | 16 |
| CGGBP1   | 16 |
| CFTR     | 16 |
| CEP250   | 16 |
| CENPE    | 16 |
| CDR2     | 16 |
| CDO1     | 16 |
| CDKN1A   | 16 |
| CD6      | 16 |
| CD48     | 16 |
| CD180    | 16 |
| CCDC102B | 16 |
| CBX7     | 16 |
| CADPS2   | 16 |
| CACYBP   | 16 |
| CACNA1H  | 16 |
| CACNA1B  | 16 |
| CA8      | 16 |
| C1QL1    | 16 |
| BRD7     | 16 |

## Table S3B

|          |    |
|----------|----|
| BEX1     | 16 |
| BCAM     | 16 |
| BAI2     | 16 |
| ATP6V0C  | 16 |
| ATP5I    | 16 |
| ATP5B    | 16 |
| ATP1B2   | 16 |
| ATP10A   | 16 |
| ATF7     | 16 |
| ASPHD1   | 16 |
| ASCC3L1  | 16 |
| ARMCX1   | 16 |
| ARHGEF3  | 16 |
| ARHGEF17 | 16 |
| AQP6     | 16 |
| APLP1    | 16 |
| APBA1    | 16 |
| APAF1    | 16 |
| AP1G2    | 16 |
| AOAH     | 16 |
| ANKRD10  | 16 |
| ANGPT2   | 16 |
| AMPD3    | 16 |
| ALPPL2   | 16 |
| ADD1     | 16 |
| ADAM9    | 16 |
| ACTA2    | 16 |
| ACAA2    | 16 |
| ABR      | 16 |
