# Supplementary material for: Antagonism Pattern Detection between MicroRNA and Target Expression in Ewing’s Sarcoma
Source: PubMed Central journal article supplement (PMC3404966; doi:10.1371/journal.pone.0041770), 2012-07-25
Supplement: pone.0041770.s006.pdf [file pone.0041770.s006.pdf]

| <b>TABLE S4</b>    |                                        |                                        |                                      |                                         |                                          |                                     |                                     |                                   |
|--------------------|----------------------------------------|----------------------------------------|--------------------------------------|-----------------------------------------|------------------------------------------|-------------------------------------|-------------------------------------|-----------------------------------|
| <b>Seed length</b> | <b>Positive correlation seed count</b> | <b>Negative correlation seed count</b> | <b>Antagonism pattern seed count</b> | <b>Mean randomized pairs seed count</b> | <b>Stdev randomized pairs seed count</b> | <b>p-value positive correlation</b> | <b>p-value negative correlation</b> | <b>p-value antagonism pattern</b> |
| 8-mer              | 362                                    | 415                                    | 383                                  | 313                                     | 20                                       | 0.01                                | 1.30E-007                           | 1.93E-004                         |
| 7-mer              | 1517                                   | 1588                                   | 1520                                 | 1249                                    | 41                                       | 1.04E-011                           | 0                                   | 1.92E-011                         |
| 6-mer              | 7270                                   | 7449                                   | 7180                                 | 5907                                    | 137                                      | 0                                   | 0                                   | 0                                 |
| tot                | 9149                                   | 9452                                   | 9083                                 | 7469                                    | 198                                      | 0                                   | 0                                   | 2.22E-016                         |
