# Supplementary material for: Antagonism Pattern Detection between MicroRNA and Target Expression in Ewing’s Sarcoma
Source: PubMed Central journal article supplement (PMC3404966; doi:10.1371/journal.pone.0041770), 2012-07-25
Supplement: pone.0041770.s007.pdf [file pone.0041770.s007.pdf]

| <b>TABLE S5A Gene Ontology Analysis of antagonism based target genes</b> |                                      |                                |                                  |                                     |
|--------------------------------------------------------------------------|--------------------------------------|--------------------------------|----------------------------------|-------------------------------------|
|                                                                          | <b>GO term description</b>           | <b># Total annotated genes</b> | <b># Antagonism linked genes</b> | <b>PV (<math>-\log_{10}</math>)</b> |
| <b>hsa-miR-1</b>                                                         |                                      |                                |                                  |                                     |
|                                                                          | sarcomere                            | 14                             | 6                                | 8.44                                |
|                                                                          | myofibril                            | 19                             | 6                                | 7.50                                |
|                                                                          | contractile fiber part               | 23                             | 6                                | 6.95                                |
|                                                                          | contractile fiber                    | 25                             | 6                                | 6.71                                |
|                                                                          | striated muscle contraction          | 14                             | 5                                | 6.62                                |
|                                                                          | structural constituent of muscle     | 33                             | 6                                | 5.95                                |
| <b>hsa-miR-127</b>                                                       |                                      |                                |                                  |                                     |
|                                                                          | M phase of mitotic cell cycle        | 85                             | 15                               | 4.88                                |
|                                                                          | mitosis                              | 82                             | 14                               | 4.43                                |
| <b>hsa-miR-133a</b>                                                      |                                      |                                |                                  |                                     |
|                                                                          | sarcomere                            | 14                             | 5                                | 5.82                                |
|                                                                          | myofibril                            | 19                             | 5                                | 5.09                                |
|                                                                          | structural constituent of muscle     | 33                             | 6                                | 5.01                                |
|                                                                          | contractil fiber part                | 23                             | 5                                | 4.65                                |
|                                                                          | contractil fiber                     | 25                             | 5                                | 4.46                                |
| <b>hsa-miR-142-3p</b>                                                    |                                      |                                |                                  |                                     |
|                                                                          | cellular protein complex disassembly | 13                             | 8                                | 5.17                                |
|                                                                          | protein complex disassembly          | 14                             | 8                                | 4.84                                |
|                                                                          | macromolecular complex disassembly   | 15                             | 8                                | 4.55                                |
| <b>hsa-miR-142-5p</b>                                                    |                                      |                                |                                  |                                     |
|                                                                          | RNA processing                       | 174                            | 26                               | 4.39                                |
|                                                                          | cellular protein complex disassembly | 13                             | 6                                | 4.11                                |
| <b>hsa-miR-143</b>                                                       |                                      |                                |                                  |                                     |
|                                                                          | RNA processing                       | 174                            | 36                               | 5.40                                |
| <b>hsa-miR-148b</b>                                                      |                                      |                                |                                  |                                     |
|                                                                          | collagen                             | 23                             | 312                              | 6.80                                |
|                                                                          | proteinaceous extracellular matrix   | 98                             | 25                               | 5.85                                |
|                                                                          | extracellular matrix                 | 100                            | 25                               | 5.67                                |
|                                                                          | extracellular matrix part            | 57                             | 17                               | 5.14                                |
| <b>hsa-miR-155</b>                                                       |                                      |                                |                                  |                                     |
|                                                                          | protein ubiquitination               | 40                             | 8                                | 4.07                                |
| <b>hsa-miR-186</b>                                                       |                                      |                                |                                  |                                     |
|                                                                          | collagen                             | 23                             | 9                                | 4.50                                |
| <b>hsa-miR-206</b>                                                       |                                      |                                |                                  |                                     |
|                                                                          | sarcomere                            | 14                             | 6                                | 7.27                                |
|                                                                          | myofibril                            | 19                             | 6                                | 6.35                                |
|                                                                          | structural constituent of muscle     | 33                             | 7                                | 6.03                                |
|                                                                          | contractil fiber part                | 23                             | 6                                | 5.80                                |
|                                                                          | contractil fiber                     | 25                             | 6                                | 5.57                                |
|                                                                          | straited muscle contraction          | 14                             | 4                                | 4.18                                |
| <b>hsa-miR-222</b>                                                       |                                      |                                |                                  |                                     |
|                                                                          | collagen                             | 23                             | 10                               | 4.59                                |

| <b>TABLE S5A (continue 2/2) - Gene Ontology Analysis of antagonism based target genes</b> |                                                  |                                |                                  |                                     |
|-------------------------------------------------------------------------------------------|--------------------------------------------------|--------------------------------|----------------------------------|-------------------------------------|
|                                                                                           | <b>GO term description</b>                       | <b># Total annotated genes</b> | <b># Antagonism linked genes</b> | <b>PV (<math>-\log_{10}</math>)</b> |
| <b>hsa-miR-29b</b>                                                                        |                                                  |                                |                                  |                                     |
|                                                                                           | cell cycle process                               | 193                            | 33                               | 6.83                                |
|                                                                                           | cell cycle phase                                 | 170                            | 29                               | 6.95                                |
|                                                                                           | mitotic cell cycle                               | 153                            | 26                               | 5.45                                |
|                                                                                           | M phase of mitotic cell cycle                    | 85                             | 18                               | 5.31                                |
|                                                                                           | cell cycle                                       | 315                            | 41                               | 5.08                                |
|                                                                                           | M phase                                          | 114                            | 21                               | 5.07                                |
|                                                                                           | mitosis                                          | 82                             | 16                               | 4.32                                |
| <b>hsa-miR-30b</b>                                                                        |                                                  |                                |                                  |                                     |
|                                                                                           | collagen                                         | 23                             | 10                               | 4.26                                |
| <b>hsa-miR-30d</b>                                                                        |                                                  |                                |                                  |                                     |
|                                                                                           | proteinaceous extracellular matrix               | 98                             | 25                               | 5.65                                |
|                                                                                           | extracellular matrix                             | 100                            | 25                               | 5.48                                |
|                                                                                           | extracellular matrix part                        | 57                             | 17                               | 4.99                                |
|                                                                                           | collagen                                         | 23                             | 10                               | 4.75                                |
| <b>hsa-miR-324-3p</b>                                                                     |                                                  |                                |                                  |                                     |
|                                                                                           | collagen                                         | 23                             | 12                               | 5.30                                |
|                                                                                           | extracellular matrix part                        | 57                             | 19                               | 4.45                                |
|                                                                                           | transmembrane receptor protein kinase activity   | 51                             | 17                               | 4.04                                |
| <b>hsa-miR-328</b>                                                                        |                                                  |                                |                                  |                                     |
|                                                                                           | collagen                                         | 23                             | 11                               | 4.46                                |
| <b>hsa-miR-329</b>                                                                        |                                                  |                                |                                  |                                     |
|                                                                                           | collagen                                         | 23                             | 10                               | 5.92                                |
| <b>hsa-miR-361</b>                                                                        |                                                  |                                |                                  |                                     |
|                                                                                           | collagen                                         | 23                             | 9                                | 4.47                                |
| <b>hsa-miR-369-3p</b>                                                                     |                                                  |                                |                                  |                                     |
|                                                                                           | mitotic spindle organization and biogenesis      | 10                             | 5                                | 4.46                                |
|                                                                                           | spindle organization and biogenesis              | 11                             | 5                                | 4.42                                |
| <b>hsa-miR-379</b>                                                                        |                                                  |                                |                                  |                                     |
|                                                                                           | extracellular matrix part                        | 57                             | 13                               | 4.91                                |
| <b>hsa-miR-410</b>                                                                        |                                                  |                                |                                  |                                     |
|                                                                                           | extracellular matrix                             | 100                            | 19                               | 4.89                                |
|                                                                                           | proteinaceous extracellular matrix               | 98                             | 18                               | 4.45                                |
|                                                                                           | collagen                                         | 23                             | 8                                | 4.29                                |
| <b>hsa-miR-512-3p</b>                                                                     |                                                  |                                |                                  |                                     |
|                                                                                           | striated muscle contraction                      | 14                             | 5                                | 4.11                                |
| <b>hsa-miR-532</b>                                                                        |                                                  |                                |                                  |                                     |
|                                                                                           | microtubule                                      | 32                             | 9                                | 4.46                                |
| <b>hsa-miR-582</b>                                                                        |                                                  |                                |                                  |                                     |
|                                                                                           | RNA splicing                                     | 92                             | 28                               | 5.69                                |
| <b>hsa-miR-655</b>                                                                        |                                                  |                                |                                  |                                     |
|                                                                                           | regulation of anatomical structure morphogenesis | 26                             | 8                                | 4.55                                |
| <b>hsa-miR-656</b>                                                                        |                                                  |                                |                                  |                                     |
|                                                                                           | phospholipid transporter activity                | 12                             | 5                                | 4.84                                |
| <b>hsa-miR-92b</b>                                                                        |                                                  |                                |                                  |                                     |
|                                                                                           | collagen                                         | 23                             | 8                                | 4.01                                |

| <b>TABLE S5B Gene Ontology analysis of target genes based on both antagonism and miRNA seed occurrence</b> |                                              |                                |                                  |                               |
|------------------------------------------------------------------------------------------------------------|----------------------------------------------|--------------------------------|----------------------------------|-------------------------------|
|                                                                                                            | <b>GO term description</b>                   | <b># Total annotated genes</b> | <b># Antagonism linked genes</b> | <b>PV</b><br>( $-\log_{10}$ ) |
| <b>hsa-miR-1</b>                                                                                           |                                              |                                |                                  |                               |
|                                                                                                            | sarcomere                                    | 14                             | 4                                | 5.82                          |
|                                                                                                            | myofibril                                    | 19                             | 4                                | 5.24                          |
|                                                                                                            | contractile fiber part                       | 23                             | 4                                | 4.89                          |
|                                                                                                            | contractile fiber                            | 25                             | 4                                | 4.74                          |
| <b>hsa-miR-130a</b>                                                                                        |                                              |                                |                                  |                               |
|                                                                                                            | lysosomal membrane                           | 10                             | 5                                | 4.36                          |
|                                                                                                            | vacuolar membrane                            | 11                             | 5                                | 4.11                          |
| <b>hsa-miR-142-5p</b>                                                                                      |                                              |                                |                                  |                               |
|                                                                                                            | mRNA processing                              | 74                             | 12                               | 4.41                          |
|                                                                                                            | RNA processing                               | 174                            | 19                               | 4.09                          |
|                                                                                                            | RNA splicing                                 | 92                             | 13                               | 4.09                          |
| <b>hsa-miR-148b</b>                                                                                        |                                              |                                |                                  |                               |
|                                                                                                            | collagen                                     | 23                             | 9                                | 5.48                          |
|                                                                                                            | proteinaceous extracellular matrix           | 98                             | 18                               | 4.83                          |
|                                                                                                            | extracellular matrix                         | 100                            | 18                               | 4.70                          |
| <b>hsa-miR-155</b>                                                                                         |                                              |                                |                                  |                               |
|                                                                                                            | small conjugating protein binding            | 12                             | 4                                | 4.02                          |
| <b>hsa-miR-186</b>                                                                                         |                                              |                                |                                  |                               |
|                                                                                                            | collagen                                     | 23                             | 8                                | 4.41                          |
| <b>hsa-miR-192</b>                                                                                         |                                              |                                |                                  |                               |
|                                                                                                            | protein serine threonine phosphatase complex | 10                             | 5                                | 4.07                          |
| <b>hsa-miR-30d</b>                                                                                         |                                              |                                |                                  |                               |
|                                                                                                            | proteinaceous extracellular matrix           | 98                             | 18                               | 4.34                          |
|                                                                                                            | collagen                                     | 23                             | 8                                | 4.23                          |
|                                                                                                            | extracellular matrix                         | 100                            | 18                               | 4.22                          |
| <b>hsa-miR-494</b>                                                                                         |                                              |                                |                                  |                               |
|                                                                                                            | collagen                                     | 23                             | 7                                | 4.49                          |
| <b>hsa-miR-532</b>                                                                                         |                                              |                                |                                  |                               |
|                                                                                                            | microtubule                                  | 32                             | 7                                | 4.45                          |

| <b>Gene Ontology Analysis of correlation based target genes</b> |                                                         |                                |                                   |                                     |
|-----------------------------------------------------------------|---------------------------------------------------------|--------------------------------|-----------------------------------|-------------------------------------|
| <b>TABLE S5C</b>                                                | <b>GO term description</b>                              | <b># Total annotated genes</b> | <b># Correlation linked genes</b> | <b>PV (<math>-\log_{10}</math>)</b> |
| <b>hsa-miR-1</b>                                                |                                                         |                                |                                   |                                     |
|                                                                 | structural constituent of muscle                        | 33                             | 9                                 | 12.86                               |
|                                                                 | striated muscle contraction                             | 14                             | 7                                 | 12.27                               |
|                                                                 | regulation of muscle contraction                        | 19                             | 7                                 | 11.12                               |
|                                                                 | contractile fiber part                                  | 23                             | 7                                 | 10.44                               |
|                                                                 | contractile fiber                                       | 25                             | 7                                 | 10.15                               |
|                                                                 | sarcomere                                               | 14                             | 6                                 | 10.05                               |
|                                                                 | myofibril                                               | 19                             | 6                                 | 9.10                                |
|                                                                 | regulation of multicellular organism process            | 151                            | 10                                | 7.88                                |
|                                                                 | system process                                          | 563                            | 15                                | 6.35                                |
|                                                                 | actin cytoskeleton                                      | 129                            | 8                                 | 6.14                                |
|                                                                 | structural molecule activity                            | 244                            | 10                                | 5.92                                |
|                                                                 | regulation of heart contraction                         | 25                             | 4                                 | 4.91                                |
|                                                                 | cytoskeleton                                            | 368                            | 10                                | 4.34                                |
| <b>hsa-miR-126</b>                                              |                                                         |                                |                                   |                                     |
|                                                                 | transmembrane receptor protein kinase activity          | 51                             | 7                                 | 6.94                                |
|                                                                 | transmembrane receptor protein tyrosine kinase activity | 43                             | 6                                 | 6.05                                |
|                                                                 | protein kinase activity                                 | 63                             | 6                                 | 5.06                                |
|                                                                 | transmembrane receptor activity                         | 419                            | 12                                | 4.08                                |
| <b>hsa-miR-126*</b>                                             |                                                         |                                |                                   |                                     |
|                                                                 | extracellular matrix part                               | 57                             | 5                                 | 4.95                                |
|                                                                 | cell cell adhesion                                      | 86                             | 5                                 | 4.08                                |
| <b>hsa-miR-130b</b>                                             |                                                         |                                |                                   |                                     |
|                                                                 | cell cycle                                              | 315                            | 29                                | 14.46                               |
|                                                                 | cell cycle process                                      | 193                            | 23                                | 13.84                               |
|                                                                 | mitotic cell cycle                                      | 153                            | 20                                | 12.82                               |
|                                                                 | cell cycle phase                                        | 170                            | 20                                | 11.94                               |
|                                                                 | regulation of cell cycle                                | 182                            | 18                                | 9.50                                |
|                                                                 | M phase                                                 | 114                            | 14                                | 8.70                                |
|                                                                 | mitosis                                                 | 82                             | 12                                | 8.41                                |
|                                                                 | M phase of mitotic cell cycle                           | 85                             | 12                                | 8.22                                |
|                                                                 | chromosome                                              | 124                            | 14                                | 8.22                                |
|                                                                 | DNA metabolic process                                   | 257                            | 19                                | 7.88                                |
|                                                                 | cell cycle checkpoint                                   | 48                             | 9                                 | 7.40                                |
|                                                                 | DNA replication                                         | 102                            | 12                                | 7.31                                |
|                                                                 | spindle                                                 | 39                             | 8                                 | 6.95                                |
|                                                                 | regulation of mitosis                                   | 41                             | 8                                 | 6.77                                |
|                                                                 | chromosomal part                                        | 96                             | 11                                | 6.62                                |
|                                                                 | response to DNA damage stimulus                         | 162                            | 12                                | 5.13                                |
|                                                                 | mitotic spindle organization and biogenesis             | 10                             | 4                                 | 4.96                                |
|                                                                 | microtubule cytoskeleton organization and biogenesis    | 35                             | 6                                 | 4.85                                |
|                                                                 | spindle organization and biogenesis                     | 11                             | 4                                 | 4.77                                |
|                                                                 | microtubule cytoskeleton                                | 152                            | 11                                | 4.64                                |
|                                                                 | DNA integrity checkpoint                                | 24                             | 5                                 | 4.55                                |
|                                                                 | response to endogenous stimulus                         | 200                            | 12                                | 4.21                                |
|                                                                 | interphase                                              | 68                             | 7                                 | 4.09                                |
|                                                                 | intracellular non membrane bound organelle              | 632                            | 23                                | 4.02                                |
|                                                                 | non membrane bound organelle                            | 632                            | 23                                | 4.02                                |

| <b>TABLE S5C (continue 2/5) - Gene Ontology Analysis of correlation based target genes</b> |                                              |                                |                                   |                                     |
|--------------------------------------------------------------------------------------------|----------------------------------------------|--------------------------------|-----------------------------------|-------------------------------------|
|                                                                                            | <b>GO term description</b>                   | <b># Total annotated genes</b> | <b># Correlation linked genes</b> | <b>PV (<math>-\log_{10}</math>)</b> |
| <b>hsa-miR-133a</b>                                                                        |                                              |                                |                                   |                                     |
|                                                                                            | structural constituent of muscle             | 33                             | 11                                | 16.00                               |
|                                                                                            | regulation of muscle contraction             | 19                             | 8                                 | 12.67                               |
|                                                                                            | contractile fiber part                       | 23                             | 8                                 | 11.87                               |
|                                                                                            | sarcomere                                    | 14                             | 7                                 | 11.79                               |
|                                                                                            | striated muscle contraction                  | 14                             | 7                                 | 11.79                               |
|                                                                                            | contractile fiber                            | 25                             | 8                                 | 11.53                               |
|                                                                                            | myofibril                                    | 19                             | 7                                 | 10.63                               |
|                                                                                            | regulation of multicellular organism process | 151                            | 11                                | 8.34                                |
|                                                                                            | system process                               | 563                            | 17                                | 6.93                                |
|                                                                                            | cytoskeleton                                 | 368                            | 12                                | 5.26                                |
|                                                                                            | regulation of heart contraction              | 25                             | 4                                 | 4.65                                |
| <b>hsa-miR-143</b>                                                                         |                                              |                                |                                   |                                     |
|                                                                                            | collagen                                     | 23                             | 6                                 | 7.13                                |
|                                                                                            | proteinaceous extracellular matrix           | 98                             | 8                                 | 5.27                                |
|                                                                                            | extracellular matrix                         | 100                            | 8                                 | 5.20                                |
|                                                                                            | extracellular matrix part                    | 57                             | 6                                 | 4.67                                |
| <b>hsa-miR-145</b>                                                                         |                                              |                                |                                   |                                     |
|                                                                                            | proteinaceous extracellular matrix           | 98                             | 20                                | 11.39                               |
|                                                                                            | extracellular matrix                         | 100                            | 20                                | 11.22                               |
|                                                                                            | extracellular matrix part                    | 57                             | 13                                | 8.20                                |
|                                                                                            | collagen                                     | 23                             | 9                                 | 8.12                                |
|                                                                                            | extracellular region part                    | 339                            | 30                                | 7.36                                |
|                                                                                            | extracellular region                         | 448                            | 35                                | 7.16                                |
| <b>hsa-miR-152</b>                                                                         |                                              |                                |                                   |                                     |
|                                                                                            | collagen                                     | 23                             | 11                                | 13.83                               |
|                                                                                            | extracellular matrix part                    | 57                             | 12                                | 10.14                               |
|                                                                                            | proteinaceous extracellular matrix           | 98                             | 12                                | 7.32                                |
|                                                                                            | extracellular matrix                         | 100                            | 12                                | 7.22                                |
|                                                                                            | extracellular region part                    | 339                            | 18                                | 5.11                                |
|                                                                                            | extracellular region                         | 448                            | 20                                | 4.52                                |
| <b>hsa-miR-17-5p</b>                                                                       |                                              |                                |                                   |                                     |
|                                                                                            | mitotic cell cycle                           | 153                            | 8                                 | 6.37                                |
|                                                                                            | cell cycle phase                             | 170                            | 8                                 | 6.03                                |
|                                                                                            | cell cycle                                   | 315                            | 10                                | 5.89                                |
|                                                                                            | cell cycle process                           | 193                            | 8                                 | 5.61                                |
|                                                                                            | spindle                                      | 39                             | 4                                 | 4.52                                |
|                                                                                            | mitosis                                      | 82                             | 5                                 | 4.43                                |
|                                                                                            | M phase of mitotic cell cycle                | 85                             | 5                                 | 4.36                                |
| <b>hsa-miR-193a</b>                                                                        |                                              |                                |                                   |                                     |
|                                                                                            | collagen                                     | 23                             | 5                                 | 4.54                                |

| <b>TABLE S5C (continue 3/5) - Gene Ontology Analysis of correlation based target genes</b> |                                              |                                |                                   |                                     |
|--------------------------------------------------------------------------------------------|----------------------------------------------|--------------------------------|-----------------------------------|-------------------------------------|
|                                                                                            | <b>GO term description</b>                   | <b># Total annotated genes</b> | <b># Correlation linked genes</b> | <b>PV (<math>-\log_{10}</math>)</b> |
| <b>hsa-miR-199b</b>                                                                        |                                              |                                |                                   |                                     |
|                                                                                            | collagen                                     | 23                             | 11                                | 10.22                               |
|                                                                                            | extracellular matrix part                    | 57                             | 15                                | 9.34                                |
|                                                                                            | proteinaceous extracellular matrix           | 98                             | 19                                | 9.20                                |
|                                                                                            | extracellular matrix                         | 100                            | 19                                | 9.05                                |
|                                                                                            | extracellular region part                    | 339                            | 34                                | 7.85                                |
|                                                                                            | extracellular region                         | 448                            | 40                                | 7.72                                |
|                                                                                            | organ development                            | 572                            | 38                                | 4.24                                |
| <b>hsa-miR-206</b>                                                                         |                                              |                                |                                   |                                     |
|                                                                                            | structural constituent of muscle             | 33                             | 8                                 | 11.40                               |
|                                                                                            | striated muscle contraction                  | 14                             | 6                                 | 10.34                               |
|                                                                                            | regulation of muscle contraction             | 19                             | 6                                 | 9.40                                |
|                                                                                            | contractile fiber part                       | 23                             | 6                                 | 8.83                                |
|                                                                                            | contractile fiber                            | 25                             | 6                                 | 8.59                                |
|                                                                                            | sarcomere                                    | 14                             | 5                                 | 8.19                                |
|                                                                                            | myofibril                                    | 19                             | 5                                 | 7.44                                |
|                                                                                            | regulation of multicellular organism process | 151                            | 9                                 | 7.15                                |
|                                                                                            | system process                               | 563                            | 15                                | 7.05                                |
|                                                                                            | structural molecule activity                 | 244                            | 9                                 | 5.39                                |
|                                                                                            | actin cytoskeleton                           | 129                            | 7                                 | 5.35                                |
|                                                                                            | regulation of heart contraction              | 25                             | 4                                 | 5.10                                |
|                                                                                            | muscle development                           | 93                             | 6                                 | 5.07                                |
| <b>hsa-miR-223</b>                                                                         |                                              |                                |                                   |                                     |
|                                                                                            | response to external stimulus                | 313                            | 12                                | 5.99                                |
|                                                                                            | response to wounding                         | 191                            | 9                                 | 5.28                                |
|                                                                                            | plasma membrane                              | 1429                           | 23                                | 4.52                                |
|                                                                                            | locomotory behaviour                         | 97                             | 6                                 | 4.31                                |
| <b>hsa-miR-30b</b>                                                                         |                                              |                                |                                   |                                     |
|                                                                                            | extracellular matrix part                    | 57                             | 4                                 | 5.87                                |
|                                                                                            | extracellular matrix structural constituent  | 27                             | 3                                 | 5.07                                |
|                                                                                            | proteinaceous extracellular matrix           | 98                             | 4                                 | 4.92                                |
|                                                                                            | extracellular matrix                         | 100                            | 4                                 | 4.88                                |
|                                                                                            | basement membrane                            | 37                             | 3                                 | 4.65                                |
| <b>hsa-miR-30d</b>                                                                         |                                              |                                |                                   |                                     |
|                                                                                            | collagen                                     | 23                             | 10                                | 11.31                               |
|                                                                                            | proteinaceous extracellular matrix           | 98                             | 15                                | 9.35                                |
|                                                                                            | extracellular matrix part                    | 57                             | 12                                | 9.23                                |
|                                                                                            | extracellular matrix                         | 100                            | 15                                | 9.22                                |
|                                                                                            | extracellular region part                    | 339                            | 24                                | 7.57                                |
|                                                                                            | extracellular region                         | 448                            | 25                                | 5.88                                |
|                                                                                            | organ development                            | 572                            | 26                                | 4.45                                |

| <b>TABLE S5C (continue 4/5) - Gene Ontology Analysis of correlation based target genes</b> |                                              |                                |                                   |                                     |
|--------------------------------------------------------------------------------------------|----------------------------------------------|--------------------------------|-----------------------------------|-------------------------------------|
|                                                                                            | <b>GO term description</b>                   | <b># Total annotated genes</b> | <b># Correlation linked genes</b> | <b>PV (<math>-\log_{10}</math>)</b> |
| <b>hsa-miR-324-3p</b>                                                                      |                                              |                                |                                   |                                     |
|                                                                                            | extracellular matrix part                    | 57                             | 11                                | 6.51                                |
|                                                                                            | collagen                                     | 23                             | 7                                 | 5.75                                |
|                                                                                            | proteinaceous extracellular matrix           | 98                             | 13                                | 5.63                                |
|                                                                                            | extracellular matrix                         | 100                            | 13                                | 5.53                                |
|                                                                                            | extracellular region part                    | 339                            | 23                                | 4.30                                |
| <b>hsa-miR-328</b>                                                                         |                                              |                                |                                   |                                     |
|                                                                                            | collagen                                     | 23                             | 6                                 | 5.54                                |
|                                                                                            | extracellular matrix part                    | 57                             | 8                                 | 5.05                                |
| <b>hsa-miR-374</b>                                                                         |                                              |                                |                                   |                                     |
|                                                                                            | extracellular matrix structural constituent  | 27                             | 3                                 | 4.78                                |
| <b>hsa-miR-378</b>                                                                         |                                              |                                |                                   |                                     |
|                                                                                            | structural constituent of muscle             | 33                             | 7                                 | 9.49                                |
|                                                                                            | myofibril                                    | 19                             | 6                                 | 9.33                                |
|                                                                                            | regulation of muscle contraction             | 19                             | 6                                 | 9.33                                |
|                                                                                            | contractile fiber part                       | 23                             | 6                                 | 8.77                                |
|                                                                                            | contractile fiber                            | 25                             | 6                                 | 8.53                                |
|                                                                                            | sarcomere                                    | 14                             | 5                                 | 8.14                                |
|                                                                                            | striated muscle contraction                  | 14                             | 4                                 | 6.14                                |
|                                                                                            | regulation of multicellular organism process | 151                            | 7                                 | 4.84                                |
|                                                                                            | actin cytoskeleton                           | 129                            | 6                                 | 4.21                                |
| <b>hsa-miR-484</b>                                                                         |                                              |                                |                                   |                                     |
|                                                                                            | M phase of mitotic cell cycle                | 85                             | 10                                | 10.45                               |
|                                                                                            | cell cycle process                           | 193                            | 13                                | 10.44                               |
|                                                                                            | mitotic cell cycle                           | 153                            | 12                                | 10.41                               |
|                                                                                            | cell cycle phase                             | 170                            | 12                                | 9.87                                |
|                                                                                            | M phase                                      | 114                            | 10                                | 9.17                                |
|                                                                                            | mitosis                                      | 82                             | 9                                 | 9.15                                |
|                                                                                            | cell cycle                                   | 315                            | 14                                | 8.84                                |
|                                                                                            | mitotic sister chromatide segregation        | 16                             | 3                                 | 4.02                                |
| <b>hsa-miR-499</b>                                                                         |                                              |                                |                                   |                                     |
|                                                                                            | structural constituent of muscle             | 33                             | 10                                | 14.33                               |
|                                                                                            | regulation of muscle contraction             | 19                             | 8                                 | 12.87                               |
|                                                                                            | contractile fiber part                       | 23                             | 7                                 | 10.13                               |
|                                                                                            | contractile fiber                            | 25                             | 7                                 | 9.84                                |
|                                                                                            | sarcomere                                    | 14                             | 6                                 | 9.78                                |
|                                                                                            | striated muscle contraction                  | 14                             | 6                                 | 9.78                                |
|                                                                                            | myofibril                                    | 19                             | 6                                 | 8.84                                |
|                                                                                            | actin cytoskeleton                           | 129                            | 10                                | 8.11                                |
|                                                                                            | regulation of multicellular organism process | 151                            | 10                                | 7.45                                |
|                                                                                            | system process                               | 563                            | 16                                | 6.52                                |
|                                                                                            | cytoskeleton                                 | 368                            | 12                                | 5.51                                |
|                                                                                            | structural molecule activity                 | 244                            | 10                                | 5.51                                |

| <b>TABLE S5C (continue 5/5) - Gene Ontology Analysis of correlation based target genes</b> |                                                |                                |                                   |                                     |
|--------------------------------------------------------------------------------------------|------------------------------------------------|--------------------------------|-----------------------------------|-------------------------------------|
|                                                                                            | <b>GO term description</b>                     | <b># Total annotated genes</b> | <b># Correlation linked genes</b> | <b>PV (<math>-\log_{10}</math>)</b> |
| <b>hsa-miR-574</b>                                                                         |                                                |                                |                                   |                                     |
|                                                                                            | extracellular matrix part                      | 57                             | 12                                | 7.64                                |
|                                                                                            | collagen                                       | 23                             | 8                                 | 7.11                                |
|                                                                                            | proteinaceous extracellular matrix             | 98                             | 14                                | 6.57                                |
|                                                                                            | extracellular matrix                           | 100                            | 14                                | 6.46                                |
|                                                                                            | extracellular region part                      | 339                            | 23                                | 4.48                                |
|                                                                                            | transmembrane receptor protein kinase activity | 51                             | 8                                 | 4.28                                |
| <b>hsa-miR-594</b>                                                                         |                                                |                                |                                   |                                     |
|                                                                                            | collagen                                       | 23                             | 5                                 | 4.82                                |
|                                                                                            | extracellular matrix part                      | 57                             | 7                                 | 4.82                                |
| <b>hsa-miR-663</b>                                                                         |                                                |                                |                                   |                                     |
|                                                                                            | collagen                                       | 23                             | 4                                 | 4.25                                |
|                                                                                            | extracellular matrix part                      | 57                             | 6                                 | 4.85                                |
| <b>hsa-miR-9</b>                                                                           |                                                |                                |                                   |                                     |
|                                                                                            | cell cycle process                             | 193                            | 17                                | 12.22                               |
|                                                                                            | cell cycle phase                               | 170                            | 16                                | 11.95                               |
|                                                                                            | mitotic cell cycle                             | 153                            | 15                                | 11.46                               |
|                                                                                            | mitosis                                        | 82                             | 11                                | 9.95                                |
|                                                                                            | M phase of mitotic cell cycle                  | 85                             | 11                                | 9.78                                |
|                                                                                            | M phase                                        | 114                            | 12                                | 9.57                                |
|                                                                                            | cell cycle                                     | 315                            | 17                                | 8.83                                |
|                                                                                            | mitotic sister chromatide segregation          | 16                             | 5                                 | 6.70                                |
|                                                                                            | sister chromatide segregation                  | 17                             | 5                                 | 6.55                                |
|                                                                                            | chromosome segregation                         | 32                             | 6                                 | 6.51                                |
|                                                                                            | chromosome                                     | 124                            | 8                                 | 4.88                                |
|                                                                                            | chromosomal part                               | 96                             | 7                                 | 4.67                                |
|                                                                                            | chromosome condensation                        | 10                             | 3                                 | 4.11                                |
| <b>hsa-miR-9*</b>                                                                          |                                                |                                |                                   |                                     |
|                                                                                            | mitosis                                        | 82                             | 8                                 | 9.14                                |
|                                                                                            | M phase of mitotic cell cycle                  | 85                             | 8                                 | 9.01                                |
|                                                                                            | M phase                                        | 114                            | 8                                 | 7.99                                |
|                                                                                            | cell cycle process                             | 193                            | 9                                 | 7.41                                |
|                                                                                            | mitotic cell cycle                             | 153                            | 8                                 | 6.98                                |
|                                                                                            | cell cycle phase                               | 170                            | 8                                 | 6.63                                |
|                                                                                            | cell cycle                                     | 315                            | 9                                 | 5.60                                |
|                                                                                            | microtubule cytoskeleton                       | 152                            | 6                                 | 4.60                                |
|                                                                                            | mitotic sister chromatide segregation          | 16                             | 3                                 | 4.51                                |
|                                                                                            | sister chromatide segregation                  | 17                             | 3                                 | 4.43                                |
| <b>hsa-miR-93</b>                                                                          |                                                |                                |                                   |                                     |
|                                                                                            | cell cycle phase                               | 170                            | 9                                 | 7.52                                |
|                                                                                            | cell cycle process                             | 193                            | 9                                 | 7.04                                |
|                                                                                            | M phase                                        | 114                            | 7                                 | 6.34                                |
|                                                                                            | mitotic cell cycle                             | 153                            | 7                                 | 5.47                                |
|                                                                                            | cell cycle                                     | 315                            | 9                                 | 5.26                                |
|                                                                                            | mitosis                                        | 82                             | 5                                 | 4.61                                |
|                                                                                            | M phase of mitotic cell cycle                  | 85                             | 5                                 | 4.53                                |



| TABLE S5D            | Gene Ontology analysis of target genes<br>based on both correlation and miRNA seed occurrence |                         |                            |                     |
|----------------------|-----------------------------------------------------------------------------------------------|-------------------------|----------------------------|---------------------|
|                      | GO term description                                                                           | # Total annotated genes | # Correlation linked genes | PV ( $-\log_{10}$ ) |
| <b>hsa-miR-1</b>     |                                                                                               |                         |                            |                     |
|                      | sarcomere                                                                                     | 14                      | 4                          | 8.45                |
|                      | myofibril                                                                                     | 19                      | 4                          | 7.86                |
|                      | contractile fiber part                                                                        | 23                      | 4                          | 7.50                |
|                      | contractile fiber                                                                             | 25                      | 4                          | 7.35                |
|                      | actin cytoskeleton                                                                            | 129                     | 4                          | 4.45                |
| <b>hsa-miR-133a</b>  |                                                                                               |                         |                            |                     |
|                      | sarcomere                                                                                     | 14                      | 3                          | 5.68                |
|                      | myofibril                                                                                     | 19                      | 3                          | 5.24                |
|                      | contractile fiber part                                                                        | 23                      | 3                          | 4.99                |
|                      | contractile fiber                                                                             | 25                      | 3                          | 4.88                |
|                      | actin cytoskeleton                                                                            | 129                     | 4                          | 4.06                |
| <b>hsa-miR-145</b>   |                                                                                               |                         |                            |                     |
|                      | proteinaceous extracellular matrix                                                            | 98                      | 10                         | 4.83                |
|                      | extracellular matrix                                                                          | 100                     | 10                         | 4.75                |
| <b>hsa-miR-152</b>   |                                                                                               |                         |                            |                     |
|                      | collagen                                                                                      | 23                      | 8                          | 10.78               |
|                      | extracellular matrix part                                                                     | 57                      | 9                          | 8.70                |
|                      | proteinaceous extracellular matrix                                                            | 98                      | 9                          | 6.59                |
|                      | extracellular matrix                                                                          | 100                     | 9                          | 6.52                |
|                      | extracellular region                                                                          | 448                     | 14                         | 4.27                |
|                      | extracellular region part                                                                     | 339                     | 12                         | 4.23                |
| <b>hsa-miR-17-5p</b> |                                                                                               |                         |                            |                     |
|                      | mitotic cell cycle                                                                            | 153                     | 6                          | 5.44                |
|                      | cell cycle phase                                                                              | 170                     | 6                          | 5.17                |
|                      | cell cycle process                                                                            | 193                     | 6                          | 4.86                |
|                      | mitosis                                                                                       | 82                      | 4                          | 4.09                |
|                      | M phase of mitotic cell cycle                                                                 | 85                      | 4                          | 4.03                |
| <b>hsa-miR-193a</b>  |                                                                                               |                         |                            |                     |
|                      | collagen                                                                                      | 23                      | 5                          | 5.67                |
| <b>hsa-miR-199b</b>  |                                                                                               |                         |                            |                     |
|                      | collagen                                                                                      | 23                      | 8                          | 7.94                |
|                      | proteinaceous extracellular matrix                                                            | 98                      | 14                         | 7.91                |
|                      | extracellular matrix                                                                          | 100                     | 14                         | 7.79                |
|                      | extracellular matrix part                                                                     | 57                      | 11                         | 7.72                |
|                      | extracellular region part                                                                     | 339                     | 20                         | 4.62                |
| <b>hsa-miR-206</b>   |                                                                                               |                         |                            |                     |
|                      | sarcomere                                                                                     | 14                      | 3                          | 6.08                |
|                      | myofibril                                                                                     | 19                      | 3                          | 5.66                |
|                      | contractile fiber part                                                                        | 23                      | 3                          | 5.40                |
|                      | contractile fiber                                                                             | 25                      | 3                          | 5.28                |
|                      | intracellular non membrane bound organelle                                                    | 632                     | 7                          | 5.09                |
|                      | non membrane bound organelle                                                                  | 632                     | 7                          | 5.09                |
|                      | skeletal muscle development                                                                   | 31                      | 3                          | 4.99                |
|                      | striated muscle development                                                                   | 40                      | 3                          | 4.66                |
|                      | actin cytoskeleton                                                                            | 129                     | 4                          | 4.60                |
|                      | cytoskeleton protein binding                                                                  | 159                     | 4                          | 4.24                |

| <b>TABLE S5D</b>   | <b>(continue 2/2) - Gene Ontology analysis of target genes<br/>based on both correlation and miRNA seed occurrence</b> |                                    |                                       |                                         |
|--------------------|------------------------------------------------------------------------------------------------------------------------|------------------------------------|---------------------------------------|-----------------------------------------|
|                    | <b>GO term description</b>                                                                                             | <b># Total<br/>annotated genes</b> | <b># Correlation<br/>linked genes</b> | <b>PV<br/>(<math>-\log_{10}</math>)</b> |
| <b>hsa-miR-30d</b> |                                                                                                                        |                                    |                                       |                                         |
|                    | collagen                                                                                                               | 23                                 | 8                                     | 9.30                                    |
|                    | extracellular matrix part                                                                                              | 57                                 | 9                                     | 7.08                                    |
|                    | proteinaceous extracellular matrix                                                                                     | 98                                 | 11                                    | 6.96                                    |
|                    | extracellular matrix                                                                                                   | 100                                | 11                                    | 6.87                                    |
|                    | extracellular region part                                                                                              | 339                                | 19                                    | 6.66                                    |
|                    | extracellular region                                                                                                   | 448                                | 20                                    | 5.43                                    |
| <b>hsa-miR-374</b> |                                                                                                                        |                                    |                                       |                                         |
|                    | extracellular matrix structural constituent                                                                            | 27                                 | 3                                     | 5.59                                    |
| <b>hsa-miR-378</b> |                                                                                                                        |                                    |                                       |                                         |
|                    | structural constituent of muscle                                                                                       | 33                                 | 5                                     | 7.74                                    |
|                    | myofibril                                                                                                              | 19                                 | 4                                     | 6.85                                    |
|                    | contractile fiber part                                                                                                 | 23                                 | 4                                     | 6.50                                    |
|                    | contractile fiber                                                                                                      | 25                                 | 4                                     | 6.35                                    |
|                    | sarcomere                                                                                                              | 14                                 | 3                                     | 5.24                                    |
|                    | striated muscle contraction                                                                                            | 14                                 | 3                                     | 5.24                                    |
|                    | regulation of muscle contraction                                                                                       | 19                                 | 3                                     | 4.82                                    |
| <b>hsa-miR-484</b> |                                                                                                                        |                                    |                                       |                                         |
|                    | cell cycle process                                                                                                     | 193                                | 9                                     | 7.96                                    |
|                    | mitotic cell cycle                                                                                                     | 153                                | 8                                     | 7.46                                    |
|                    | cell cycle                                                                                                             | 315                                | 10                                    | 7.25                                    |
|                    | cell cycle phase                                                                                                       | 170                                | 8                                     | 7.11                                    |
|                    | mitosis                                                                                                                | 82                                 | 6                                     | 6.51                                    |
|                    | M phase of mitotic cell cycle                                                                                          | 85                                 | 6                                     | 6.42                                    |
|                    | M phase                                                                                                                | 114                                | 6                                     | 5.67                                    |
| <b>hsa-miR-499</b> |                                                                                                                        |                                    |                                       |                                         |
|                    | sarcomere                                                                                                              | 14                                 | 3                                     | 5.59                                    |
|                    | striated muscle contraction                                                                                            | 14                                 | 3                                     | 5.59                                    |
|                    | myofibril                                                                                                              | 19                                 | 3                                     | 5.17                                    |
|                    | contractile fiber part                                                                                                 | 23                                 | 3                                     | 4.91                                    |
|                    | contractile fiber                                                                                                      | 25                                 | 3                                     | 4.80                                    |
| <b>hsa-miR-9</b>   |                                                                                                                        |                                    |                                       |                                         |
|                    | cell cycle process                                                                                                     | 193                                | 7                                     | 4.65                                    |
| <b>hsa-miR-93</b>  |                                                                                                                        |                                    |                                       |                                         |
|                    | cell cycle phase                                                                                                       | 170                                | 7                                     | 6.20                                    |
|                    | cell cycle process                                                                                                     | 193                                | 7                                     | 5.83                                    |
|                    | mitotic cell cycle                                                                                                     | 153                                | 6                                     | 5.22                                    |
|                    | M phase                                                                                                                | 114                                | 5                                     | 4.63                                    |
|                    | cell cycle                                                                                                             | 315                                | 7                                     | 4.43                                    |
