# Supplementary material for: Antagonism Pattern Detection between MicroRNA and Target Expression in Ewing’s Sarcoma
Source: PubMed Central journal article supplement (PMC3404966; doi:10.1371/journal.pone.0041770), 2012-07-25
Supplement: pone.0041770.s009.pdf [file pone.0041770.s009.pdf]

| <b>TABLE S7</b> | <b>List of common miRNA hubs between</b>                      |                                 |
|-----------------|---------------------------------------------------------------|---------------------------------|
|                 | <b>antagonism-based network and correlation-based network</b> |                                 |
|                 | <b>Antagonism connectivity</b>                                | <b>Correlation connectivity</b> |
| hsa-miR-324-3p  | 160                                                           | 271                             |
| hsa-miR-328     | 127                                                           | 208                             |
| hsa-miR-146b    | 121                                                           | 82                              |
| hsa-miR-125a    | 116                                                           | 145                             |
| hsa-miR-574     | 108                                                           | 73                              |
| hsa-miR-342     | 104                                                           | 71                              |
| hsa-miR-594     | 93                                                            | 169                             |
| hsa-miR-221     | 80                                                            | 102                             |
| hsa-miR-486     | 75                                                            | 69                              |
| hsa-miR-143     | 73                                                            | 54                              |
| hsa-miR-92      | 72                                                            | 126                             |
| hsa-miR-145     | 69                                                            | 95                              |
| hsa-miR-423     | 66                                                            | 76                              |
| hsa-miR-30d     | 65                                                            | 236                             |
| hsa-miR-130b    | 62                                                            | 70                              |
| hsa-miR-191     | 60                                                            | 88                              |
| hsa-miR-222     | 59                                                            | 101                             |
| hsa-miR-30b     | 55                                                            | 55                              |
| hsa-miR-148b    | 55                                                            | 78                              |
| hsa-miR-193a    | 54                                                            | 95                              |
| hsa-miR-210     | 51                                                            | 130                             |
